# Supplementary material for: Use of isomeric, aromatic dialdehydes in the synthesis of photoactive, positional isomers of higher analogs of o-bromo(hetero)acenaldehydes
Source: Royal Society of Chemistry journal article supplement (doi:10.1039/c4ra14071k), 2015-01-01
Supplement: c4ra14071k1.pdf [file c4ra14071k1.pdf]

## Use of Isomeric, Aromatic Dialdehydes in Synthesis of Photoactive, Positional Isomers of Higher Analogs of *o*-Bromo(hetero)acetaldehydes

Piotr Balczewski, Joanna Skalik, Paweł Uznański, Dariusz Guziejewski, Witold Ciesielski,

### Experimental Section

**General:** The  $^1\text{H}$  NMR (200 MHz) and  $^{13}\text{C}$  NMR (50 MHz) spectra were recorded using a Bruker AV 200 spectrometer. The mass spectra of pure compounds were obtained using a Finigan Mat 95 spectrometer. Melting points were determined using Boetius apparatus. UV-visible absorption spectra were obtained with a Specord S600 diode array spectrophotometer in 5-cm cuvettes. Room-temperature emission spectra were acquired with a Perkin Elmer LS50 luminescence spectrometer. Quantum yields were calculated using quinine sulfate dihydrate in 0.1 *N*  $\text{HClO}_4$  as the standard reference material ( $\Phi=0.59$ ). Column chromatography was done using Merck silica gel (F<sub>254</sub> 60, 270-400 mesh). Organic solvents were purified by standard procedures. Aldehydes: 2,5-dibromobenzene-1,4-dicarbaldehyde and 2,4-dibromobenzene-1,5-dicarbaldehyde have been prepared according to the following procedure: M. C. Bonifacio, C. R. Robertson, J. Y. Jung, B. T. King, *J. Org. Chem.*, 2005, **70** 8522.

The stability of **6a** towards photooxidation was investigated by monitoring the absorbance as a function of time (0-100 minute range) decay of  $10^{-6}$  M chlorobenzene solution in a quartz cuvette at room temperature, under ambient atmosphere and exposed under 9W UV/Vis lamp with broad band light with maximum at 370 nm (Fig.1.).

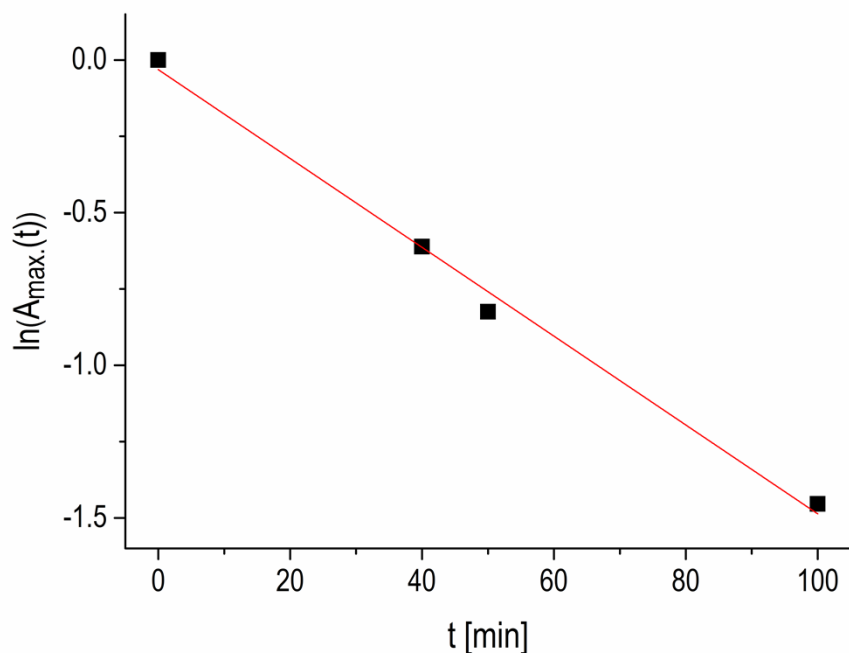

Fig. 1. Intensity decrease of the absorption band of 6a in chlorobenzene under UV/vis light exposure at room temperature under ambient atmosphere.

**General procedure for synthesis of protected dibromo dialdehydes 2 and 8:** To a solution of 2,5-dibromobenzene-1,4-dicarbaldehyde (**1**) or 2,4-dibromobenzene-1,5-dicarbaldehyde (**7**) (10 g, 34 mmol) in toluene (50 mL) were added *Amberlite IR 120* (as a catalyst) and 1,3-propanediol (4.9 mL, 68 mmol). The resulting mixture was refluxed for 6 h using a Dean-Stark trap for the azeotropic removal of water. After evaporation of the solvent, the residue was diluted with chloroform (100 mL), filtered off and organic layer was washed with water (50 mL), brine (50 mL) and again with water (3x50 mL). The organic layer was dried (MgSO<sub>4</sub>) and then evaporated under vacuum to give corresponding diacetals (**2**) or (**8**) as crystals. All new compounds prepared by the above procedure were characterized spectroscopically as shown below.

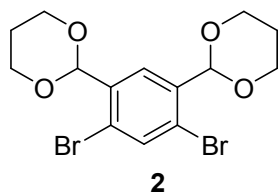

Yield: 58 %; white crystals, mp 166-167°C; <sup>1</sup>H NMR (200MHz, C<sub>6</sub>D<sub>6</sub>, 25°C, TMS, δ): 0.57 (d, H<sub>eq</sub><sup>2,2'</sup>, 2H), 1.65-1.82 (m, H<sub>ax</sub><sup>2,2'</sup>, 2H), 3.37-3.49 (m, H<sub>eq</sub><sup>4,4',6,6'</sup>, 4H), 3.75-3.83 (m, H<sub>ax</sub><sup>4,4',6,6'</sup>, 4H), 5.61 (s, OCHO, 2H), 7.59 (s, Ar-H, 1H), 8.60 (s, Ar-H, 1H); <sup>13</sup>C NMR (50MHz, C<sub>6</sub>D<sub>6</sub>, 25°C, TMS, δ): 26.31 (s, OCH<sub>2</sub>CH<sub>2</sub>CH<sub>2</sub>O), 67.88 (s, OCH<sub>2</sub>CH<sub>2</sub>CH<sub>2</sub>O), 101.22 (s, OCHO), 124.01 (s, C<sub>Ar</sub>-H), 129.57 (s, C<sub>Ar</sub>-H), 136.49 (s, C<sub>Ar</sub>-Br), 138.71 (s, C<sub>Ar</sub>-CHOC<sub>3</sub>H<sub>6</sub>O); MS (EI, 70eV): m/z (%): 408.9 (17.2) [M], 87.1 (100) [-C<sub>4</sub>H<sub>7</sub>O<sub>2</sub>]; HR MS (EI, 70 eV): m/z calcd for C<sub>14</sub>H<sub>16</sub>Br<sub>2</sub>O<sub>4</sub>: 405.94155; found: 405.94202.

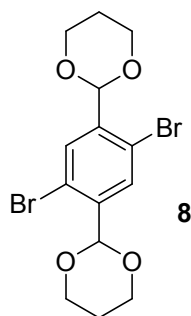

Yield: 78 %; white crystals, mp 230°C;  $^1\text{H}$  NMR (200MHz,  $\text{C}_6\text{D}_6$ , 25 °C, TMS,  $\delta$ ): 0.57 (d,  $\text{H}_{\text{eq}}^{2,2'}$ , 2H), 1.67-1.82 (m,  $\text{H}_{\text{ax}}^{2,2'}$ , 2H), 3.35-3.47 (m,  $\text{H}_{\text{eq}}^{4,4',6,6'}$ , 4H), 3.74-3.82 (m,  $\text{H}_{\text{ax}}^{4,4',6,6'}$ , 4H), 5.56 (s, OCHO, 2H), 8.24 (s, Ar-H, 1H);  $^{13}\text{C}$  NMR (50MHz,  $\text{C}_6\text{D}_6$ , 25 °C, TMS,  $\delta$ ): 26.33 (s,  $\text{OCH}_2\text{CH}_2\text{CH}_2\text{O}$ ), 67.88 (s,  $\text{OCH}_2\text{CH}_2\text{CH}_2\text{O}$ ), 100.91 (s, OCHO), 122.40 (s,  $\text{C}_{\text{Ar-H}}$ ), 133.62 (s,  $\text{C}_{\text{Ar-Br}}$ ), 140.95 (s,  $\text{C}_{\text{Ar-CHOC}_3\text{H}_6\text{O}}$ ); MS (EI, 70eV):  $m/z$  (%) 408.9 (100) [M], 87.1 (12) [ $-\text{C}_4\text{H}_7\text{O}_2$ ]; HR MS (EI, 70 eV):  $m/z$  calcd for  $\text{C}_{14}\text{H}_{16}\text{Br}_2\text{O}_4$ : 405.94155; found: 405.94488.

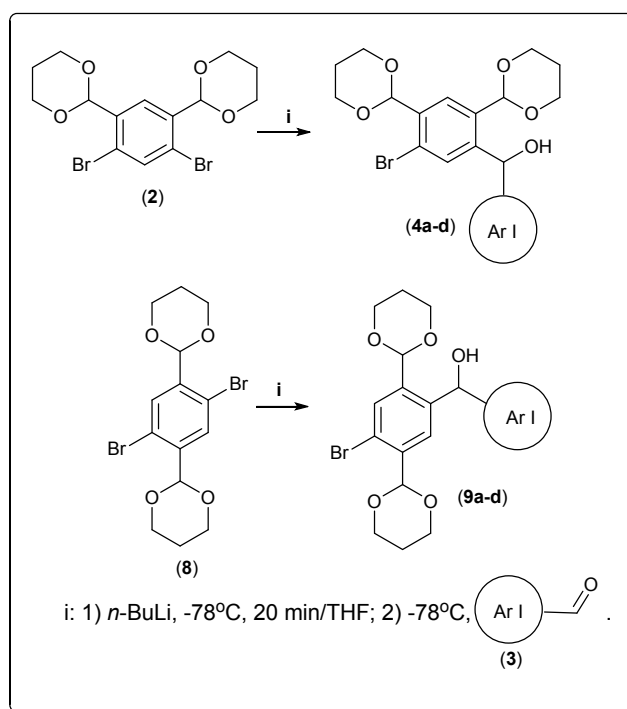

**General procedure for synthesis of diarylmethanols 4a-d and 9a-d:** The 1,5-dibromo-2,4-bis(1,3-dioxan-2-yl)-benzene (**2**) or 1,4-dibromo-2,5-bis(1,3-dioxan-2-yl)-benzene (**8**) (1 mmol) was dissolved in dry THF (50 mL), cooled to  $-78$  °C and then *n*-BuLi in heptane (2.6 M, 1.2 mmol) was added. The resulting mixture was stirred for 40 min under argon atmosphere. The corresponding (hetero)aromatic aldehydes (**3**) (1.1 mmol) in dry THF (3 mL), was added at  $-78$  °C and stirring was continued for 1.5 h from  $-78$ °C to room temperature. Then saturated aqueous solution of  $\text{NH}_4\text{Cl}$  was added and the organic layer was evaporated. The residue was diluted with ethyl acetate (50 mL) and washed with water (3 x 20 mL). The organic layer was dried ( $\text{MgSO}_4$ ) and then filtrated. The solvent was removed in vacuum and the residue purified by column chromatography (mixtures *n*-hexane/acetone) to give the corresponding

diarylmethanols (**4a-d**) and (**9a-d**) as solids. All new compounds prepared by the above procedure were characterized spectroscopically as shown below.

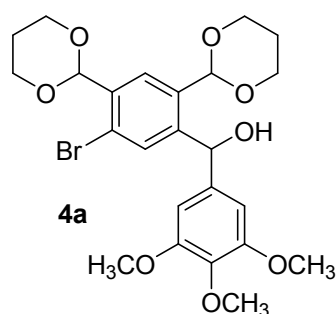

Yield: 31 %; yellow foam, mp 80-82°C; <sup>1</sup>H NMR (200MHz, C<sub>6</sub>D<sub>6</sub>, 25 °C, TMS, δ): 0.58 (d, H<sub>eq</sub><sup>5,5'</sup>, 2H), 1.65-1.83 (m, H<sub>ax</sub><sup>5,5'</sup>, 2H), 3.26-3.49 (m, H<sub>ax</sub><sup>4,4',6,6'</sup>, 4H), 3.38 (s, *m*-ArOCH<sub>3</sub>, 6H), 3.69-3.86 (m, H<sub>eq</sub><sup>4,4',6,6'</sup>, 4H), 3.85 (s, *p*-ArOCH<sub>3</sub>, 3H), 5.21 (s, OCHO, 1H), 5.52 (s, OCHO, 1H), 6.53 (s, CHO, 1H), 6.97 (s, *o*-Ar(OCH<sub>3</sub>)<sub>3</sub>, 2H), 7.82 (s, Ar-H, 1H), 7.84 (s, Ar-H, 1H); <sup>13</sup>C NMR (50MHz, C<sub>6</sub>D<sub>6</sub>, 25 °C, TMS, δ): 26.30 (s, 2x OCH<sub>2</sub>CH<sub>2</sub>CH<sub>2</sub>O), 56.40 (s, 2x *m*-Ar(OCH<sub>3</sub>)<sub>2</sub>), 61.18 (s, *p*-ArOCH<sub>3</sub>), 67.98 (s, 2x OCH<sub>2</sub>CH<sub>2</sub>CH<sub>2</sub>O), 73.00 (s, CHO), 101.95 (s, 2x OCHO), 105.16 (s, 2x *o*-C<sub>Ar</sub>-H), 126.40 (s, C<sub>Ar</sub>-H), 132.36 (s, C<sub>Ar</sub>-H), 137.65 (s, C<sub>Ar</sub>-CHOCH<sub>2</sub>CH<sub>2</sub>CH<sub>2</sub>O), 138.12 (s, C<sub>Ar</sub>-CHOCH<sub>2</sub>CH<sub>2</sub>CH<sub>2</sub>O), 138.96 (s, 2x C<sub>Ar</sub>-CHOH), 139.61 (s, *p*-C<sub>Ar</sub>-OCH<sub>3</sub>), 141.49 (s, C<sub>Ar</sub>-Br), 143.06 (s, *ipso*-C<sub>Ar</sub>Ar(OCH<sub>3</sub>)<sub>3</sub>), 154.65 (s, 2x *m*-C<sub>Ar</sub>-OCH<sub>3</sub>); MS (EI, 70eV): *m/z* (%) 524 (6.75) [M], 450 (57.49) [M, (-OC<sub>3</sub>H<sub>6</sub>O)], 370 (100) [M, (-HOC<sub>3</sub>H<sub>6</sub>OH, -OC<sub>3</sub>H<sub>6</sub>O)]; HR MS (EI, 70 eV): *m/z* calcd for C<sub>24</sub>H<sub>29</sub>BrO<sub>8</sub>: 524.10253 ; found: 524.10186.

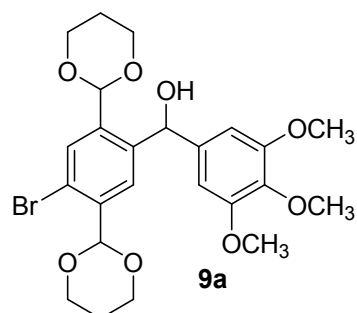

Yield: 60 %; yellow oil, <sup>1</sup>H NMR (200MHz, C<sub>6</sub>D<sub>6</sub>, 25 °C, TMS, δ): 0.55 (d, H<sub>eq</sub><sup>5,5'</sup>, 2H), 1.66-1.85 (m, H<sub>ax</sub><sup>5,5'</sup>, 2H), 3.24-3.66 (m, H<sub>ax</sub><sup>4,4',6,6'</sup>, 4H), 3.34 (s, *m*-ArOCH<sub>3</sub>, 6H), 3.72-3.88 (m, H<sub>eq</sub><sup>4,4',6,6'</sup>, 4H), 3.84 (s, *p*-ArOCH<sub>3</sub>, 3H), 5.39 (s, OCHO, 1H), 5.76 (s, OCHO, 1H), 6.35 (s, CHO, 1H), 6.86 (s, *o*-Ar(OCH<sub>3</sub>)<sub>3</sub>, 2H), 7.79 (s, Ar-H, 1H), 8.51 (s, Ar-H, 1H); <sup>13</sup>C NMR (50MHz, C<sub>6</sub>D<sub>6</sub>, 25 °C, TMS, δ): 26.19 (s, OCH<sub>2</sub>CH<sub>2</sub>CH<sub>2</sub>O), 26.49 (s, OCH<sub>2</sub>CH<sub>2</sub>CH<sub>2</sub>O), 54.06 (s, 2x *m*-Ar(OCH<sub>3</sub>)<sub>2</sub>), 58.87 (s, *p*-ArOCH<sub>3</sub>), 67.96 (s, 2x OCH<sub>2</sub>CH<sub>2</sub>CH<sub>2</sub>O), 72.40 (s, CHO), 101.69 (s, 2x OCHO), 105.25 (s, 2x *o*-C<sub>Ar</sub>-H), 124.46 (s, C<sub>Ar</sub>-H), 133.98 (s, C<sub>Ar</sub>-H), 136.86 (s, C<sub>Ar</sub>-CHOCH<sub>2</sub>CH<sub>2</sub>CH<sub>2</sub>O), 138.94 (s, 2x C<sub>Ar</sub>-CHOH), 139.22 (s, *p*-C<sub>Ar</sub>-OCH<sub>3</sub>), 138.94 (s, C<sub>Ar</sub>-Br), 146.22 (s, *ipso*-C<sub>Ar</sub>Ar(OCH<sub>3</sub>)<sub>3</sub>), 154.85 (s, 2x *m*-C<sub>Ar</sub>-OCH<sub>3</sub>); MS (CI, isobutane): *m/z* (%) 525 (30) [M+1], 451 (100) [M+1 (-OC<sub>3</sub>H<sub>6</sub>O)]; HR MS (EI, 70 eV): *m/z* calcd for C<sub>24</sub>H<sub>29</sub>BrO<sub>8</sub>: 524.10253; found: 524.10296.



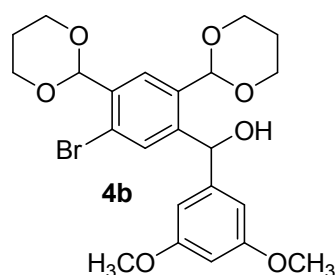

Yield: 76 %; yellow foam, mp 68-70 °C; <sup>1</sup>H NMR (200MHz, CDCl<sub>3</sub>, 25 °C, TMS, δ): 1.42 (d, H<sub>eq</sub><sup>5,5'</sup>, 2H), 2.10-2.23 (m, H<sub>ax</sub><sup>5,5'</sup>, 2H), 3.71 (s, OH, 1H), 3.73 (s, *m*-ArOCH<sub>3</sub>, 6H), 3.81-4.02 (m, H<sub>ax</sub><sup>4,4',6,6'</sup>, 4H), 4.18-4.23 (m, H<sub>eq</sub><sup>4,4',6,6'</sup>, 4H), 5.46 (s, OCHO, 1H), 5.68 (s, OCHO, 1H), 6.17 (s, CHOH, 1H), 6.35 (s, *p*-Ar-H, 1H), 6.51 (s, *o*-Ar-H, 2H), 7.33 (s, Ar-H, 1H), 7.83 (s, Ar-H, 1H); <sup>13</sup>C NMR (50MHz, CDCl<sub>3</sub>, 25 °C, TMS, δ): 25.58 (s, 2x OCH<sub>2</sub>CH<sub>2</sub>CH<sub>2</sub>O), 34.02 (s, 2x OCH<sub>2</sub>CH<sub>2</sub>CH<sub>2</sub>O), 55.56 [s, 2x *m*-Ar(OCH<sub>3</sub>)<sub>2</sub>], 62.07 (s, 2x OCH<sub>2</sub>CH<sub>2</sub>CH<sub>2</sub>O), 67.51 (s, 2x OCH<sub>2</sub>CH<sub>2</sub>CH<sub>2</sub>O), 84.44 (s, CHOH), 100.47 (s, OCHO), 100.54 (s, OCHO), 104.87 (s, C<sub>Ar</sub>-H), 106.04 (s, C<sub>Ar</sub>-H), 122.86 (s, C<sub>Ar</sub>-H), 126.34 (s, C<sub>Ar</sub>-H), 136.84 (s, C<sub>Ar</sub>), 137.18 (s, C<sub>Ar</sub>), 137.57 (s, C<sub>Ar</sub>), 142.03 (s, C<sub>Ar</sub>-H), 143.27 (s, C<sub>Ar</sub>), 144.88 (s, C<sub>Ar</sub>), 145.38 (s, C<sub>Ar</sub>); MS (EI, 70eV): *m/z* (%) 494.9 (10) [M]; 420.0 (100) [M, (-(-O(CH<sub>2</sub>)<sub>3</sub>O-)]], 87.0 (31) [M, ((-CHO<sub>2</sub>(CH<sub>2</sub>)<sub>3</sub>)]]; HR MS (EI, 70 eV): *m/z* calcd for C<sub>23</sub>H<sub>27</sub>BrO<sub>7</sub>: 494.09235; found: 494.09299.

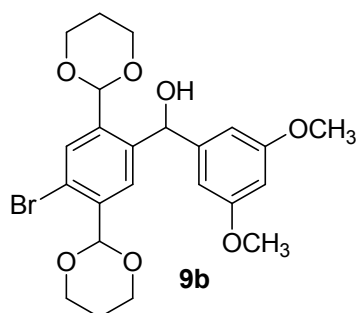

Yield: 63 %; yellow foam, mp 61-63 °C; <sup>1</sup>H NMR (200MHz, CDCl<sub>3</sub>, 25 °C, TMS, δ): 1.34 (d, H<sub>eq</sub><sup>5,5'</sup>, 2H), 2.01-2.13 (m, H<sub>ax</sub><sup>5,5'</sup>, 2H), 3.66 (s, *m*-ArOCH<sub>3</sub>, 6H), 3.80-4.00 (m, H<sub>ax</sub><sup>4,4',6,6'</sup>, 4H), 4.06-4.15 (m, H<sub>eq</sub><sup>4,4',6,6'</sup>, 4H), 5.31 (s, OCHO, 1H), 5.61 (s, OCHO, 1H), 9.92 (s, CHOH, 1H), 6.35 (s, *p*-Ar-H, 1H), 6.29 (s, *o*-Ar-H, 2H), 7.66 (s, Ar-H, 1H), 7.75 (s, Ar-H, 1H); <sup>13</sup>C NMR (50MHz, CDCl<sub>3</sub>, 25 °C, TMS, δ): 25.36 (s, 2x OCH<sub>2</sub>CH<sub>2</sub>CH<sub>2</sub>O), 25.54 (s, 2x OCH<sub>2</sub>CH<sub>2</sub>CH<sub>2</sub>O), 55.35 [s, 2x *m*-Ar(OCH<sub>3</sub>)<sub>2</sub>], 61.61 (s, 2x OCH<sub>2</sub>CH<sub>2</sub>CH<sub>2</sub>O), 67.31 (s, 2x OCH<sub>2</sub>CH<sub>2</sub>CH<sub>2</sub>O), 67.44 (s, 2x OCH<sub>2</sub>CH<sub>2</sub>CH<sub>2</sub>O), 72.91 (s, CHOH), 98.66 (s, OCHO), 99.32 (s, OCHO), 100.54 (s, C<sub>Ar</sub>-H), 104.38 (s, C<sub>Ar</sub>-H), 121.65 (s, C<sub>Ar</sub>-H), 128.97 (s, C<sub>Ar</sub>-H), 131.07 (s, C<sub>Ar</sub>), 137.79 (s, C<sub>Ar</sub>), 138.00 (s, C<sub>Ar</sub>), 140.93 (s, C<sub>Ar</sub>-H), 143.63 (s, C<sub>Ar</sub>), 145.17 (s, C<sub>Ar</sub>), 150.98 (s, C<sub>Ar</sub>); MS (EI, 70eV): *m/z* (%) 494,9 (2.76) [M]; 420,0 (43.60) [M, (-(-O(CH<sub>2</sub>)<sub>3</sub>O-)]], 87 (100) [M, (-CHO<sub>2</sub>(CH<sub>2</sub>)<sub>3</sub>)]]; HR MS (EI, 70 eV): *m/z* calcd for C<sub>23</sub>H<sub>27</sub>BrO<sub>7</sub>: 494.09235; found: 490.09260.

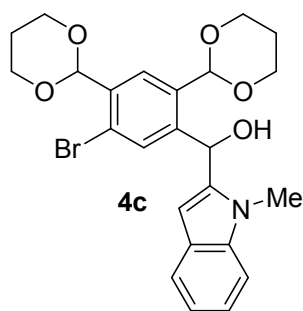

Yield: 71 %; yellow foam, mp 125 °C;  $^1\text{H}$  NMR (200MHz,  $\text{CDCl}_3$ , 25 °C, TMS,  $\delta$ ): 1.25-1.44 (m,  $\text{H}_{\text{eq}}^{5,5'}$ , 2H), 2.14-2.27 (m,  $\text{H}_{\text{ax}}^{5,5'}$ , 2H), 3.49 (s,  $\text{CH}_3$ , 1H), 3.84-4.19 (m,  $\text{H}_{\text{ax}}^{4,4',6,6'}$ , 4H), 4.22-4.24 (m,  $\text{H}_{\text{eq}}^{4,4',6,6'}$ , 4H), 5.56 (s, OCHO, 1H), 5.75 (s, OCHO, 1H), 6.46 (s, CHOH, 1H), 6.52 (s, Ar-H, 1H), 7.22 (d, Ar-H, 1H), 7.29 (t, Ar-H, 2H), 7.46 (s, Ar-H, 1H), 7.61 (d, Ar-H, 1H), 7.92 (s, Ar-H, 1H);  $^{13}\text{C}$  NMR (50MHz,  $\text{C}_6\text{D}_6$ , 25 °C, TMS,  $\delta$ ): 25.31 (s,  $\text{OCH}_2\text{CH}_2\text{CH}_2\text{O}$ ), 26.41 (s,  $\text{OCH}_2\text{CH}_2\text{CH}_2\text{O}$ ), 29.87 (s,  $\text{CH}_3$ ), 65.48 (s, CHOH), 67.11 (s,  $\text{OCH}_2\text{CH}_2\text{CH}_2\text{O}$ ), 67.15 (s,  $\text{OCH}_2\text{CH}_2\text{CH}_2\text{O}$ ), 67.30 (s,  $\text{OCH}_2\text{CH}_2\text{CH}_2\text{O}$ ), 100.33 (s, OCHO), 100.79 (s, OCHO), 101.24 (s,  $\text{C}_{\text{Ar-H}}$ ), 108.79 (s,  $\text{C}_{\text{Ar-H}}$ ), 119.13 (s,  $\text{C}_{\text{Ar-H}}$ ), 120.99 (s,  $\text{C}_{\text{Ar-H}}$ ), 121.21 (s,  $\text{C}_{\text{Ar-H}}$ ), 127.23 (s,  $\text{C}_{\text{Ar-H}}$ ), 131.91 (s,  $\text{C}_{\text{Ar-H}}$ ), 121.66 (s,  $\text{C}_{\text{Ar}}$ ), 135.08 (s,  $\text{C}_{\text{Ar}}$ ), 136.92 (s,  $\text{C}_{\text{Ar}}$ ), 137.75 (s,  $\text{C}_{\text{Ar}}$ ), 139.88 (s,  $\text{C}_{\text{Ar}}$ ), 142.38 (s,  $\text{C}_{\text{Ar}}$ ), 155.86 (s,  $\text{C}_{\text{Ar}}$ ); MS (EI, 70eV):  $m/z$  (%) 489 (24) [ $\text{M}+1$ ], 412 (20) [ $\text{M}+1$  ( $\text{HOC}_3\text{H}_6\text{OH}$ )]; HR MS (EI, 70 eV):  $m/z$  calcd for  $\text{C}_{24}\text{H}_{26}\text{BrNO}_5$ : 487.10253; found: 487.09829.

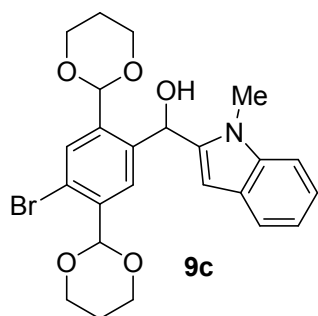

Yield: 60 %; yellow oil,  $^1\text{H}$  NMR (200MHz,  $\text{C}_6\text{D}_6$ , 25 °C, TMS,  $\delta$ ): 1.24-1.44 (m,  $\text{H}_{\text{eq}}^{5,5'}$ , 2H), 2.16-2.29 (m,  $\text{H}_{\text{ax}}^{5,5'}$ , 2H), 3.49 (s,  $\text{CH}_3$ , 1H), 3.85-4.20 (m,  $\text{H}_{\text{ax}}^{4,4',6,6'}$ , 4H), 4.20-4.23 (m,  $\text{H}_{\text{eq}}^{4,4',6,6'}$ , 4H), 5.57 (s, OCHO, 1H), 5.70 (s, OCHO, 1H), 6.47 (s, CHOH, 1H), 6.55 (s, Ar-H, 1H), 7.26 (d, Ar-H, 1H), 7.28 (t, Ar-H, 2H), 7.48 (s, Ar-H, 1H), 7.92 (d, Ar-H, 1H), 7.97 (s, Ar-H, 1H);  $^{13}\text{C}$  NMR (50MHz,  $\text{C}_6\text{D}_6$ , 25 °C, TMS,  $\delta$ ): 25.33 (s,  $\text{OCH}_2\text{CH}_2\text{CH}_2\text{O}$ ), 26.43 (s,  $\text{OCH}_2\text{CH}_2\text{CH}_2\text{O}$ ), 29.88 (s,  $\text{CH}_3$ ), 65.40 (s, CHOH), 67.10 (s,  $\text{OCH}_2\text{CH}_2\text{CH}_2\text{O}$ ), 67.22 (s,  $\text{OCH}_2\text{CH}_2\text{CH}_2\text{O}$ ), 67.29 (s,  $\text{OCH}_2\text{CH}_2\text{CH}_2\text{O}$ ), 100.35 (s, OCHO), 100.80 (s, OCHO), 101.26 (s,  $\text{C}_{\text{Ar-H}}$ ), 108.81 (s,  $\text{C}_{\text{Ar-H}}$ ), 119.10 (s,  $\text{C}_{\text{Ar-H}}$ ), 120.99 (s,  $\text{C}_{\text{Ar-H}}$ ), 122.20 (s,  $\text{C}_{\text{Ar-H}}$ ), 127.20 (s,  $\text{C}_{\text{Ar-H}}$ ), 131.90 (s,  $\text{C}_{\text{Ar-H}}$ ), 121.60 (s,  $\text{C}_{\text{Ar}}$ ), 134.04 (s,  $\text{C}_{\text{Ar}}$ ), 137.92 (s,  $\text{C}_{\text{Ar}}$ ), 135.75 (s,  $\text{C}_{\text{Ar}}$ ), 138.81 (s,  $\text{C}_{\text{Ar-Br}}$ ), 143.37 (s,  $\text{C}_{\text{Ar}}$ ), 156.86 (s,  $\text{C}_{\text{Ar}}$ ); MS (EI, 70 eV):  $m/z$  (%) 489 (30) [ $\text{M}+1$ ], 412 (15) [ $\text{M}+1$  ( $\text{HOC}_3\text{H}_6\text{OH}$ )]; HR MS (EI, 70 eV):  $m/z$  calcd for  $\text{C}_{24}\text{H}_{26}\text{BrNO}_5$ : 487.46780.10253; found: 487.100085.

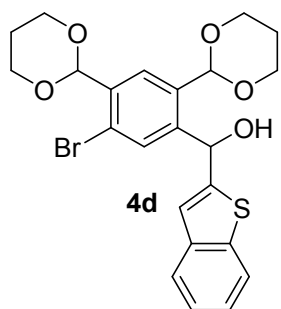

Yield: 63 %; white solid, mp 195-197 °C; <sup>1</sup>H NMR (200MHz, CDCl<sub>3</sub>, 25 °C, TMS, δ): 1.37-1.49 (m, H<sub>eq</sub><sup>5,5'</sup>, 2H), 2.13-2.37 (m, H<sub>ax</sub><sup>5,5'</sup>, 2H), 3.81-4.01 (m, H<sub>ax</sub><sup>4,4',6,6'</sup>, 4H), 4.21-4.32 (m, H<sub>eq</sub><sup>4,4',6,6'</sup>, 4H), 5.55 (s, OCHO, 1H), 5.79 (s, OCHO, 1H), 6.51 (s, CHOH, 1H), 7.08 (s, Ar-H, 1H), 7.28-7.39 (m, Ar-H, 2H), 7.65 (s, Ar-H, 1H), 7.68-7.73 (m, Ar-H, 1H), 7.81-7.86 (m, Ar-H, 1H), 7.93 (s, Ar-H, 1H); <sup>13</sup>C NMR (50MHz, CDCl<sub>3</sub>, 25 °C, TMS, δ): 25.36 (s, OCH<sub>2</sub>CH<sub>2</sub>CH<sub>2</sub>O), 25.59 (s, OCH<sub>2</sub>CH<sub>2</sub>CH<sub>2</sub>O), 67.49 (s, 2x OCH<sub>2</sub>CH<sub>2</sub>CH<sub>2</sub>O), 69.37 (s, CHOH), 100.49 (s, OCHO), 100.72 (s, OCHO), 121.06 (s, C<sub>Ar</sub>-H), 122.27 (s, C<sub>Ar</sub>-H), 123.15 (s, C<sub>Ar</sub>-H), 123.46 (s, C<sub>Ar</sub>-H), 123.92 (s, C<sub>Ar</sub>-H), 124.14 (s, C<sub>Ar</sub>-H), 127.28 (s, C<sub>Ar</sub>-H), 132.82 (s, C<sub>Ar</sub>), 135.24 (s, C<sub>Ar</sub>), 137.23 (s, C<sub>Ar</sub>), 139.64 (s, C<sub>Ar</sub>), 139.68 (s, C<sub>Ar</sub>), 143.17 (s, C<sub>Ar</sub>), 147.31 (s, C<sub>Ar</sub>); MS (EI, 70eV): m/z (%) 490 (15) [M]; 416 (100) [M, (-OC<sub>3</sub>H<sub>6</sub>O)], 414 (88) [M, (-HOC<sub>3</sub>H<sub>6</sub>OH)]; HR MS (EI, 70 eV): m/z calcd for C<sub>23</sub>H<sub>23</sub>BrO<sub>5</sub>S: 490.04318, found: 490.04278.

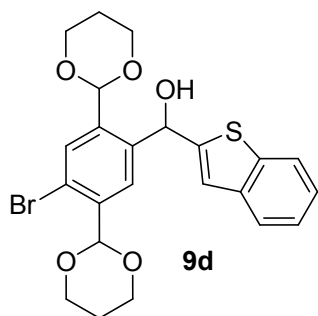

Yield: 62 %; colorless oil, <sup>1</sup>H NMR (200MHz, CDCl<sub>3</sub>, 25 °C, TMS, δ): 1.39-1.50 (m, H<sub>eq</sub><sup>5,5'</sup>, 2H), 2.12-2.35 (m, H<sub>ax</sub><sup>5,5'</sup>, 2H), 3.80-4.00 (m, H<sub>ax</sub><sup>4,4',6,6'</sup>, 4H), 4.20-4.30 (m, H<sub>eq</sub><sup>4,4',6,6'</sup>, 4H), 5.58 (s, OCHO, 1H), 5.70 (s, OCHO, 1H), 6.53 (s, CHOH, 1H), 7.01 (s, Ar-H, 1H), 7.29-7.49 (m, Ar-H, 2H), 7.60 (s, Ar-H, 1H), 7.68-7.77 (m, Ar-H, 1H), 7.87-7.89 (m, Ar-H, 1H), 7.92 (s, Ar-H, 1H); <sup>13</sup>C NMR (50MHz, CDCl<sub>3</sub>, 25 °C, TMS, δ): 24.37 (s, OCH<sub>2</sub>CH<sub>2</sub>CH<sub>2</sub>O), 26.50 (s, OCH<sub>2</sub>CH<sub>2</sub>CH<sub>2</sub>O), 66.50 (s, 2x OCH<sub>2</sub>CH<sub>2</sub>CH<sub>2</sub>O), 69.40 (s, CHOH), 100.50 (s, OCHO), 100.79 (s, OCHO), 121.16 (s, C<sub>Ar</sub>-H), 122.17 (s, C<sub>Ar</sub>-H), 123.25 (s, C<sub>Ar</sub>-H), 123.46 (s, C<sub>Ar</sub>-H), 123.99 (s, C<sub>Ar</sub>-H), 124.14 (s, C<sub>Ar</sub>-H), 128.29 (s, C<sub>Ar</sub>-H), 132.91 (s, C<sub>Ar</sub>), 135.34 (s, C<sub>Ar</sub>), 137.42 (s, C<sub>Ar</sub>), 139.68 (s, C<sub>Ar</sub>), 140.08 (s, C<sub>Ar</sub>), 144.07 (s, C<sub>Ar</sub>), 146.33 (s, C<sub>Ar</sub>); MS (EI, 70eV): m/z (%) 490 (20) [M]; 416 (100) [M, (-OC<sub>3</sub>H<sub>6</sub>O)], 414 (60) [M, (-HOC<sub>3</sub>H<sub>6</sub>OH)]; HR MS (EI, 70 eV): m/z calcd for C<sub>23</sub>H<sub>23</sub>BrO<sub>5</sub>S: 490.05318; found: 490.04393.



C<sub>Ar</sub>-H), 127.42 (s, *m*-Ph), 129.18 (s, *p*-Ph), 129.82 (s, *o*-Ph), 132.51 (s, C<sub>Ar</sub>-H), 138.24 (s, 2x C<sub>Ar</sub>-CHOCH<sub>2</sub>CH<sub>2</sub>CH<sub>2</sub>O), 139.36 (s, C<sub>Ar</sub>-CHOBn), 139.93 (s, *p*-C<sub>Ar</sub>-OCH<sub>3</sub>), 140.15 (s, C<sub>Ar</sub>-Br), 140.42 (s, *ipso*-C<sub>Ar</sub>Ar(OCH<sub>3</sub>)<sub>3</sub>), 154.73 (s, 2x *m*-C<sub>Ar</sub>-OCH<sub>3</sub>); MS (EI, 70eV): *m/z* (%) 614 (9.88) [M], 525 (100) [M, (-OC<sub>3</sub>H<sub>6</sub>O, -CH<sub>3</sub>)], 91 (78.78) [M, (PhCH<sub>2</sub>O)]; HR MS (EI, 70 eV): *m/z* calcd for C<sub>31</sub>H<sub>35</sub>BrO<sub>8</sub>: 614.15074; found: 614.15014.

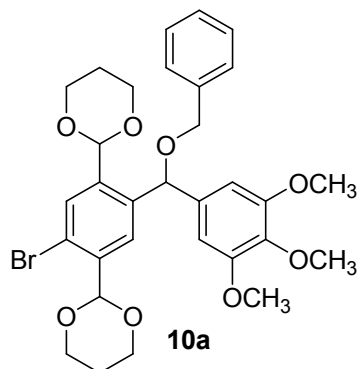

Yield: 30 %; yellow oil, <sup>1</sup>H NMR (200MHz, C<sub>6</sub>D<sub>6</sub>, 25°C, TMS, δ): 0.55 (d, H<sub>eq</sub><sup>5,5'</sup>, 2H), 1.52-1.85 (m, H<sub>ax</sub><sup>5,5'</sup>, 2H), 3.27-3.63 (m, H<sub>ax</sub><sup>4,4',6,6'</sup>, 4H), 3.37 (s, *m*-ArOCH<sub>3</sub>, 6H), 3.69-3.92 (m, H<sub>eq</sub><sup>4,4',6,6'</sup>, 4H), 3.83 (s, *p*-ArOCH<sub>3</sub>, 3H), 4.47 (d, CH<sub>A</sub>H<sub>B</sub>Ph, 1H<sub>A</sub>, <sup>2</sup>J<sub>HH</sub> = 0.06 Hz), 4.54 (d, CH<sub>A</sub>H<sub>B</sub>Ph, 1H<sub>B</sub>, <sup>2</sup>J<sub>HH</sub> = 0.06 Hz), 5.49 (s, OCHO, 1H), 5.78 (s, OCHO, 1H), 6.12 (s, CHOBn, 1H), 6.91 (s, *o*-Ar(OCH<sub>3</sub>)<sub>3</sub>, 2H), 6.98-7.02 (m, Ph, 5H), 7.12 (s, Ar-H, 1H), 7.30 (s, Ar-H, 1H); <sup>13</sup>C NMR (50MHz, C<sub>6</sub>D<sub>6</sub>, 25°C, TMS, δ): 26.35 (s, OCH<sub>2</sub>CH<sub>2</sub>CH<sub>2</sub>O), 26.35 (s, OCH<sub>2</sub>CH<sub>2</sub>CH<sub>2</sub>O), 56.42 (s, 2x *m*-Ar(OCH<sub>3</sub>)<sub>2</sub>), 61.12 (s, *p*-ArOCH<sub>3</sub>), 67.84 (s, 2x OCH<sub>2</sub>CH<sub>2</sub>CH<sub>2</sub>O), 71.44 (s, OCH<sub>2</sub>Ph), 78.06 (s, CHOBn), 100.88 (s, OCHO), 101.72 (s, OCHO), 105.88 (s, 2x *o*-C<sub>Ar</sub>-H), 124.45 (s, C<sub>Ar</sub>-H), 127.86 (s, *m*-Ph), 128.32 (s, *p*-Ph), 129.89 (s, *o*-Ph), 133.38 (s, C<sub>Ar</sub>-H), 137.74 (s, 2x C<sub>Ar</sub>-CHOCH<sub>2</sub>CH<sub>2</sub>CH<sub>2</sub>O), 138.21 (s, C<sub>Ar</sub>-CHOBn), 138.67 (s, *p*-C<sub>Ar</sub>-OCH<sub>3</sub>), 139.86 (s, C<sub>Ar</sub>-Br), 143.58 (s, *ipso*-C<sub>Ar</sub>Ar(OCH<sub>3</sub>)<sub>3</sub>), 154.84 (s, 2x *m*-C<sub>Ar</sub>-OCH<sub>3</sub>); MS (EI, 70eV): *m/z* (%) 614 (5.89) [M], 449 (73.93) [M, (-OC<sub>3</sub>H<sub>6</sub>O, PhCH<sub>2</sub>O)], 91 (100) [M, (PhCH<sub>2</sub>O)]; HR MS (EI, 70 eV): *m/z* calcd for C<sub>31</sub>H<sub>35</sub>BrO<sub>8</sub>: 614.15074; found: 614.15001.

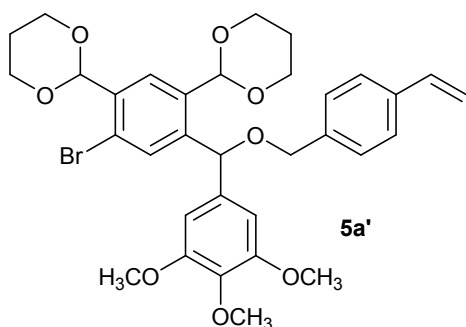

Yield: 96 %; yellow foam, mp 48-50 °C; <sup>1</sup>H NMR (200MHz, CDCl<sub>3</sub>, 25 °C, TMS, δ): 0.83 (d, H<sub>eq</sub><sup>5,5'</sup>, 2H), 1.71-2.50 (m, H<sub>ax</sub><sup>5,5'</sup>, 2H), 3.75 (s, *m*-ArOCH<sub>3</sub>, 6H), 3.80 (s, *p*-ArOCH<sub>3</sub>, 3H), 3.91-4.14 (m, H<sub>ax</sub><sup>4,4',6,6'</sup>, 4H), 4.49-3.52 (m, H<sub>eq</sub><sup>4,4',6,6'</sup>, 4H), 4.25-4.72 (dd, CH<sub>A</sub>H<sub>B</sub>Ph, 2H<sub>A</sub>, <sup>2</sup>J<sub>HH</sub>=0.06 Hz), 5.17 (d-CH=CH<sub>2</sub>, 1H); 5.40 (s, OCHO, 1H), 5.70 (d, -CH=CH<sub>2</sub>, 1H); 5.94 (s, OCHO, 1H), 6.20 (s, CHOPh, 1H), 6.53-6.67 (q, -

CH=CH<sub>2</sub>, 1H); 6.68 [s, *o*-Ar(OCH<sub>3</sub>)<sub>3</sub>, 2H], 7.29-7.34 (dd, Ph, 4H), 7.45 (s, Ar-H, 1H), 7.90 (s, Ar-H, 1H); <sup>13</sup>C NMR (50MHz, CDCl<sub>3</sub>, 25 °C, TMS, δ): 25.49 (s, 2x OCH<sub>2</sub>CH<sub>2</sub>CH<sub>2</sub>O), 25.67 (s, 2x OCH<sub>2</sub>CH<sub>2</sub>CH<sub>2</sub>O), 55.86 (s, 2x *m*-Ar(OCH<sub>3</sub>)<sub>2</sub>), 60.65 (s, *p*-ArOCH<sub>3</sub>), 67.11 (s, 2x OCH<sub>2</sub>CH<sub>2</sub>CH<sub>2</sub>O), 67.17 (s, 2x OCH<sub>2</sub>CH<sub>2</sub>CH<sub>2</sub>O), 70.12 (s, OCH<sub>2</sub>Ph), 75.93 (s, CHOBn), 99.76 (s, OCHO), 99.96 (s, OCHO), 103.53 (s, 2x *o*-C<sub>Ar</sub>-H), 113.69 (s, -CH=CH<sub>2</sub>), 122.96 (s, C<sub>Ar</sub>-H), 126.03 (s, *m*-Ph), 126.37 (s, C<sub>Ar</sub>-H), 126.68 (s, *o*-Ph), 132.23 (s, C<sub>Ar</sub>-H), 135.90 (s, C<sub>Ar</sub>-CHOBn), 136.45 (s, *p*-C<sub>Ar</sub>-OCH<sub>3</sub>), 136.53 (s, 2x C<sub>Ar</sub>-CHOCH<sub>2</sub>CH<sub>2</sub>CH<sub>2</sub>O), 136.72 (CHOCH<sub>2</sub>-C<sub>Ar</sub>), 136.82 (s, 2x C<sub>Ar</sub>-CHOCH<sub>2</sub>CH<sub>2</sub>CH<sub>2</sub>O), 136.82 (s, CH=CH<sub>2</sub>), 137.08 (s, C-CH=CH<sub>2</sub>), 137.84 (s, C<sub>Ar</sub>-Br), 142.08 (s, *ipso*-C<sub>Ar</sub>-Ar(OCH<sub>3</sub>)<sub>3</sub>), 154.90 (s, 2x *m*-C<sub>Ar</sub>-OCH<sub>3</sub>); MS (EI, 70eV): *m/z* (%) 642.2 (2) [M]; 445.2 (100) [M, (-CH<sub>2</sub>C<sub>6</sub>H<sub>4</sub>CH=CH<sub>2</sub>, -Br)], 117.2 (70) [CH<sub>2</sub>C<sub>6</sub>H<sub>4</sub>CH=CH<sub>2</sub>]; HR MS (EI, 70 eV): *m/z* calcd for C<sub>33</sub>H<sub>37</sub>BrO<sub>8</sub>: 640.16698; found: 640.16714.

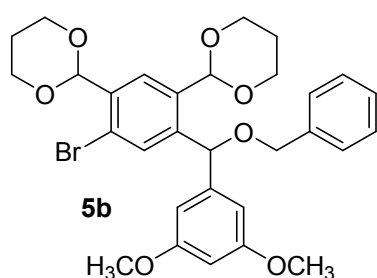

Yield: 46 %; yellow foam, mp 60-62 °C; <sup>1</sup>H NMR (200MHz, CDCl<sub>3</sub>, 25 °C, TMS, δ): 1.26-1.49 (d, H<sub>eq</sub><sup>5,5'</sup>, 2H), 2.03-2.26 (m, H<sub>ax</sub><sup>5,5'</sup>, 2H), 3.71 (s, 2 x *m*-ArOCH<sub>3</sub>, 6H), 3.93-4.05 (m, H<sub>ax</sub><sup>4,4',6,6'</sup>, 4H), 4.09-4.22 (m, H<sub>eq</sub><sup>4,4',6,6'</sup>, 4H), 4.49 (d, CH<sub>A</sub>H<sub>B</sub>Ph, 1H<sub>A</sub>, <sup>2</sup>J<sub>HH</sub> = 0,06 Hz), 4.51 (d, CH<sub>A</sub>H<sub>B</sub>Ph, 1H<sub>B</sub>, <sup>2</sup>J<sub>HH</sub> = 0,06 Hz), 5,39 (s, OCHO, 1H), 5.76 (s, OCHO, 1H), 5.90 (s, CHOBn, 1H), 6.32 (s, *o*-Ar(OCH<sub>3</sub>)<sub>3</sub>, 1H), 6.55 [s, *o*-Ar(OCH<sub>3</sub>)<sub>3</sub>, 2H], 7.30-7.33 (m, Ph, 5H), 7.64 (s, Ar-H, 1H), 7.86 (s, Ar-H, 1H); <sup>13</sup>C NMR (50MHz, CDCl<sub>3</sub>, 25 °C, TMS, δ): 25.63 (s, 2x OCH<sub>2</sub>CH<sub>2</sub>CH<sub>2</sub>O), 55.26 [s, 2x *m*-Ar(OCH<sub>3</sub>)<sub>2</sub>], 67.17 (s, 2x OCH<sub>2</sub>CH<sub>2</sub>CH<sub>2</sub>O), 67.24 (s, 2x OCH<sub>2</sub>CH<sub>2</sub>CH<sub>2</sub>O), 67.51 (s, 2x OCH<sub>2</sub>CH<sub>2</sub>CH<sub>2</sub>O), 70.43 (s, OCH<sub>2</sub>Ph), 76.16 (s, CHOBn), 99.16 (s, OCHO), 99.90 (s, OCHO), 100.64 (s, C<sub>Ar</sub>-H), 105.09 (s, C<sub>Ar</sub>-H), 123.05 (s, C<sub>Ar</sub>), 126.56 (s, C<sub>Ar</sub>-H), 126.90 (s, C<sub>Ar</sub>), 127.46 (s, C<sub>Ar</sub>-H), 127.83 (s, C<sub>Ar</sub>-H), 128.28 (s, C<sub>Ar</sub>-H), 132.31 (s, C<sub>Ar</sub>-H), 132.31 (s, C<sub>Ar</sub>), 136.02 (s, C<sub>Ar</sub>), 136.41 (s, C<sub>Ar</sub>), 142.12 (s, C<sub>Ar</sub>), 143.90 (s, C<sub>Ar</sub>); MS (EI, 70eV): *m/z* (%) 585,1 (1) [M]; 487,1 (56) [M, (-OCH<sub>2</sub>Ph)], 419 (100) [M, (-OCH<sub>2</sub>Ph, 2 x -OCH<sub>3</sub>)], 91 (86) [CH<sub>2</sub>Ph]; HR MS (EI, 70 eV): *m/z* calcd for C<sub>30</sub>H<sub>33</sub>BrO<sub>7</sub>: 585.13980; found: 585.13987.

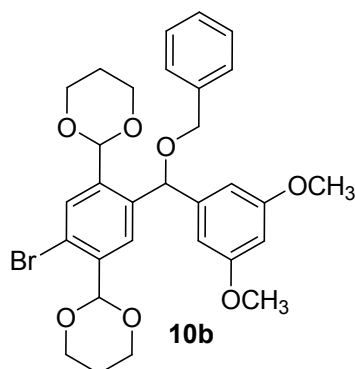



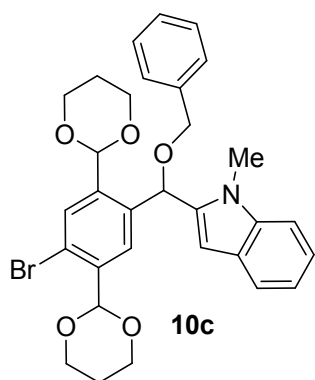

Yield: 30 %; yellow oil,  $^1\text{H}$  NMR (200MHz,  $\text{CDCl}_3$ , 25 °C, TMS,  $\delta$ ): 1.25-1.43 (m,  $\text{H}_{\text{eq}}^{5,5'}$ , 2H), 1.91-2.44 (m,  $\text{H}_{\text{ax}}^{5,5'}$ , 2H), 3.45 (s,  $\text{CH}_3$ , 1H), 3.64-3.83 (m,  $\text{H}_{\text{ax}}^{4,4',6,6'}$ , 2H), 3.99-4.23 (m,  $\text{H}_{\text{eq}}^{4,4',6,6'}$ , 4H), 4.26-4.51 (m,  $\text{H}_{\text{ax}}^{4, 4', 6, 6'}$ , 2H), 4.54-4.76 (d,  $\text{CH}_\text{A}\text{H}_\text{B}\text{Ph}$ , 1 $\text{H}_\text{A}$ ,  $^2\text{J}_{\text{HH}}=0.06$  Hz), 4.62-4.70 (d,  $\text{CH}_\text{A}\text{H}_\text{B}\text{Ph}$ , 1 $\text{H}_\text{B}$ ,  $^2\text{J}_{\text{HH}}=0.06$  Hz), 5.55 (s, OCHO, 1H), 5.83 (s, OCHO, 1H), 6.35 (s, CHOBn, 1H), 7.00 (s, Ar-H, 1H), 7.30-7.40 (m, Ph, Ar-H, 7H), 7.71 (t, Ar-H, 1H), 7.81 (t, Ar-H, 1H), 7.99 (s, Ar-H, 1H), 8.01 (s, Ar-H, 1H);  $^{13}\text{C}$  NMR (50MHz,  $\text{CDCl}_3$ , 25 °C, TMS,  $\delta$ ): 26.83 (s,  $\text{OCH}_2\text{CH}_2\text{CH}_2\text{O}$ ), 27.16 (s,  $\text{OCH}_2\text{CH}_2\text{CH}_2\text{O}$ ), 30.08 (s,  $\text{CH}_3$ ), 66.00 (s, CHOBn), 67.02 (s,  $\text{OCH}_2\text{CH}_2\text{CH}_2\text{O}$ ), 67.34 (s,  $\text{OCH}_2\text{CH}_2\text{CH}_2\text{O}$ ), 67.51 (s,  $\text{OCH}_2\text{CH}_2\text{CH}_2\text{O}$ ), 72.40 (s,  $\text{OCH}_2\text{Ph}$ ), 100.25 (s, OCHO), 100.65 (s, OCHO), 101.13 (s,  $\text{C}_{\text{Ar-H}}$ ), 106.54 (s,  $\text{C}_{\text{Ar-H}}$ ), 118.19 (s,  $\text{C}_{\text{Ar-H}}$ ), 121.34 (s,  $\text{C}_{\text{Ar-H}}$ ), 123.24 (s,  $\text{C}_{\text{Ar-H}}$ ), 126.21 (s,  $\text{C}_{\text{Ar-H}}$ ), 128.16 (s, *m*-Ph), 128.42 (s, *p*-Ph), 130.90 (s, *o*-Ph), 132.91 (s,  $\text{C}_{\text{Ar-H}}$ ), 134.60 (s,  $\text{C}_{\text{Ar}}$ ), 134.71 (s,  $\text{C}_{\text{Ar}}$ ), 135.22 (s,  $\text{C}_{\text{Ar}}$ ), 135.75 (s,  $\text{C}_{\text{Ar}}$ ), 138.91 (s,  $\text{C}_{\text{Ar}}$ ), 139.09 (s,  $\text{C}_{\text{Ar}}$ ), 142.69 (s,  $\text{C}_{\text{Ar}}$ ), 157.16 (s,  $\text{C}_{\text{Ar}}$ ); MS (EI, 70eV): *m/z* (%) 578 (10) [ $\text{M}+1$ ], 413 (70) [ $\text{M}$ , (- $\text{OC}_3\text{H}_6\text{O}$ ,  $\text{PhCH}_2\text{O}$ )], 61 (100) [ $\text{M}$ , ( $\text{PhCH}_2$ )].

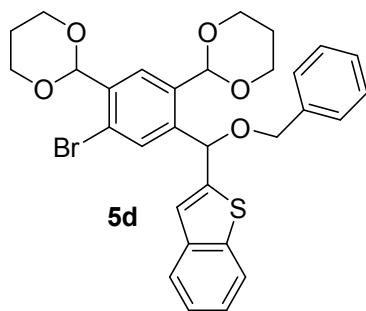

Yield: 40 %; yellow foam, mp 62-64 °C;  $^1\text{H}$  NMR (200MHz,  $\text{CDCl}_3$ , 25 °C, TMS,  $\delta$ ): 1.25-1.47 (m,  $\text{H}_{\text{eq}}^{5,5'}$ , 2H), 1.96-2.39 (m,  $\text{H}_{\text{ax}}^{5,5'}$ , 2H), 3.68-3.81 (m,  $\text{H}_{\text{ax}}^{4,4',6,6'}$ , 2H), 3.98-4.20 (m,  $\text{H}_{\text{eq}}^{4,4',6,6'}$ , 4H), 4.26-4.52 (m,  $\text{H}_{\text{ax}}^{4,4',6,6'}$ , 2H), 4.56-4.76 (d,  $\text{CH}_\text{A}\text{H}_\text{B}\text{Ph}$ , 1 $\text{H}_\text{A}$ ,  $^2\text{J}_{\text{HH}}=0.05$  Hz), 4.62-4.70 (d,  $\text{CH}_\text{A}\text{H}_\text{B}\text{Ph}$ , 1 $\text{H}_\text{B}$ ,  $^2\text{J}_{\text{HH}}=0.05$  Hz), 5.52 (s, OCHO, 1H), 5.81 (s, OCHO, 1H), 6.36 (s, CHOBn, 1H), 7.01 (s, Ar-H, 1H), 7.30-7.44 (m, Ph, Ar-H, 7H), 7.69 (t, Ar-H, 1H), 7.82 (t, Ar-H, 1H), 7.98 (s, Ar-H, 1H), 8.00 (s, Ar-H, 1H);  $^{13}\text{C}$  NMR (50MHz,  $\text{CDCl}_3$ , 25 °C, TMS,  $\delta$ ): 25.28 (s,  $\text{OCH}_2\text{CH}_2\text{CH}_2\text{O}$ ), 25.47 (s,  $\text{OCH}_2\text{CH}_2\text{CH}_2\text{O}$ ), 67.00 (s,  $\text{OCH}_2\text{CH}_2\text{CH}_2\text{O}$ ), 67.05 (s,  $\text{OCH}_2\text{CH}_2\text{CH}_2\text{O}$ ), 67.32 (s,  $\text{OCH}_2\text{CH}_2\text{CH}_2\text{O}$ ), 70.43 (s,  $\text{OCH}_2\text{Ph}$ ), 73.40 (s, CHOBn), 100.07 (s, OCHO), 100.40 (s, OCHO), 121.75 (s,  $\text{C}_{\text{Ar-H}}$ ), 122.01 (s,  $\text{C}_{\text{Ar-H}}$ ), 123.04 (s,  $\text{C}_{\text{Ar-H}}$ ), 123.39 (s,  $\text{C}_{\text{Ar-H}}$ ), 123.87 (s,  $\text{C}_{\text{Ar-H}}$ ), 126.76 (s,  $\text{C}_{\text{Ar-H}}$ ), 127.45 (s, *m*-Ph), 127.61 (s, *p*-Ph), 128.16 (s,



*o*-Ph), 128.57 (s, C<sub>Ar</sub>-H), 132.06 (s, C<sub>Ar</sub>), 136.00 (s, C<sub>Ar</sub>), 137.04(s, C<sub>Ar</sub>), 137.91 (s, C<sub>Ar</sub>), 139.32 (s, C<sub>Ar</sub>), 139,70 (s, C<sub>Ar</sub>), 141,23 (s, C<sub>Ar</sub>), 146.51(s, C<sub>Ar</sub>); MS (EI, 70eV): *m/z* (%) 614 (8) [M+2], 431 (100) [M, (-OC<sub>3</sub>H<sub>6</sub>O-)], 91 (76) [(PhCH<sub>2</sub>O)]; HR MS (EI, 70 eV): *m/z* calcd for C<sub>30</sub>H<sub>29</sub>BrO<sub>5</sub>S: 580.09244, found: 580.09218.

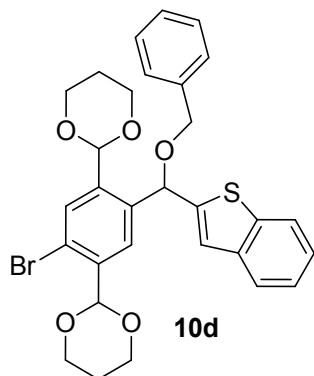

Yield: 38 %; yellow oil, <sup>1</sup>H NMR (200MHz, CDCl<sub>3</sub>, 25 °C, TMS, δ): 1.22-1.52 (m, H<sub>eq</sub><sup>5,5'</sup>, 2H), 1.93-2.39 (m, H<sub>ax</sub><sup>5,5'</sup>, 2H), 3.67-3.86 (m, H<sub>ax</sub><sup>4,4',6,6'</sup>, 2H), 3.99-4.22 (m, H<sub>eq</sub><sup>4,4',6,6'</sup>, 4H), 4.27-4.52 (m, H<sub>ax</sub><sup>4,4',6,6'</sup>, 2H), 4.55-4,75 (d, CH<sub>A</sub>H<sub>B</sub>Ph, 1H<sub>A</sub>, <sup>2</sup>J<sub>HH</sub>=0.05 Hz), 4.64-4.72 (d, CH<sub>A</sub>H<sub>B</sub>Ph, 1H<sub>B</sub>, <sup>2</sup>J<sub>HH</sub>= 0.05 Hz), 5.53 (s, OCHO, 1H), 5.86 (s, OCHO, 1H), 6.37 (s, CHOBn, 1H), 7.09 (s, Ar-H, 1H), 7.31-7.45 (m, Ph, Ar-H, 7H), 7.70 (t, Ar-H, 1H), 7.84 (t, Ar-H, 1H), 7.99 (s, Ar-H, 1H), 8.02 (s, Ar-H, 1H); <sup>13</sup>C NMR (50MHz, CDCl<sub>3</sub>, 25 °C, TMS, δ): 25.31 (s, OCH<sub>2</sub>CH<sub>2</sub>CH<sub>2</sub>O), 25.51 (s, OCH<sub>2</sub>CH<sub>2</sub>CH<sub>2</sub>O), 67.07 (s, OCH<sub>2</sub>CH<sub>2</sub>CH<sub>2</sub>O), 67.09 (s, OCH<sub>2</sub>CH<sub>2</sub>CH<sub>2</sub>O), 67.41 (s, OCH<sub>2</sub>CH<sub>2</sub>CH<sub>2</sub>O), 70.53 (s, OCH<sub>2</sub>Ph), 73.40 (s, CHOBn), 100.11(s, OCHO), 100.45 (s, OCHO), 121.78 (s, C<sub>Ar</sub>-H), 122.58 (s, C<sub>Ar</sub>-H), 123.34 (s, C<sub>Ar</sub>-H), 123.43 (s, C<sub>Ar</sub>-H), 123.99 (s, C<sub>Ar</sub>-H), 126.70 (s, C<sub>Ar</sub>-H), 127.60 (s, *m*-Ph), 127.69 (s, *p*-Ph), 128.21(s, *o*-Ph), 128.69 (s, C<sub>Ar</sub>-H), 132.13 (s, C<sub>Ar</sub>), 136.59 (s, C<sub>Ar</sub>), 136.89 (s, C<sub>Ar</sub>), 137.97 (s, C<sub>Ar</sub>), 139.34 (s, C<sub>Ar</sub>), 139,79 (s, C<sub>Ar</sub>), 142,22 (s, C<sub>Ar</sub>), 146.58(s, C<sub>Ar</sub>); MS (EI, 70eV): *m/z* (%) 614 (5) [M+2], 431 (100) [M, (-OC<sub>3</sub>H<sub>6</sub>O-)], 91 (66) [(PhCH<sub>2</sub>O)]; HR MS (EI, 70 eV): *m/z* calcd for C<sub>30</sub>H<sub>29</sub>BrO<sub>5</sub>S: 580.09244; found: 580.09249.

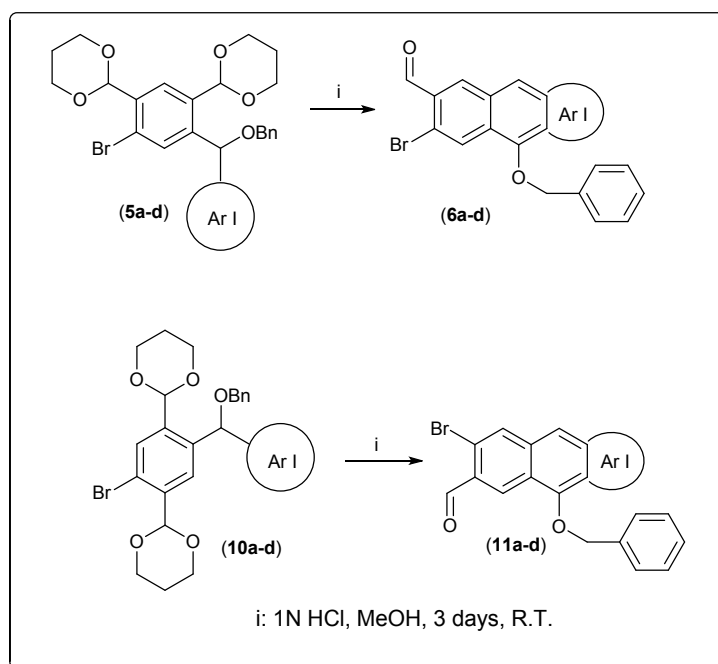

**General procedure for synthesis of *o*-bromoacetaldehydes **6a-d** and **11a-d**:** The *O*-protected diarylmethanol (**5a-d**) and (**10a-d**) (0.244 g, 0563 mmol) was dissolved in methanol (30 mL) and then an aqueous solution of 1 N HCl (17 mL) was added. The mixture was stirred at ambient temperature for 3 days. The reaction mixture was extracted with ethyl acetate (50 mL) and the organic layer was washed with water (20 mL), NaHCO<sub>3</sub> aq. (20 mL) and again with water (20 mL) and then dried (MgSO<sub>4</sub>). The solvent was removed and the products (**6a-d**, **11a-d**) were purified with column chromatography (petroleum ether/acetone 10:1). All new compounds prepared by the above procedure were characterized spectroscopically as shown below.

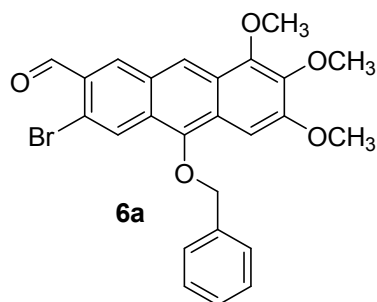

Yield: 99 %; orange solid, mp 155 °C; <sup>1</sup>H NMR (200MHz, C<sub>6</sub>D<sub>6</sub>, 25 °C, TMS, δ): 3.31 (s, OCH<sub>3</sub>, 3H); 3.80 (s, OCH<sub>3</sub>, 3H); 3.89 (s, OCH<sub>3</sub>, 3H), 4.93 (s, OCH<sub>2</sub>Ph, 2H); 7.06-7.30 (m, C<sub>6</sub>H<sub>5</sub>, 5H); 7.91 (s, Ar, 1H); 8.32 (s, Ar, 1H); 9.09 (s, Ar, 1H) 10.50 (s, CHO, 1H); <sup>13</sup>C NMR (50MHz, C<sub>6</sub>D<sub>6</sub>, 25 °C, TMS, δ): 55.86 (s, OCH<sub>3</sub>), 61.58 (s, OCH<sub>3</sub>), 61.81 (s, OCH<sub>3</sub>); 79.10 (s, OCH<sub>2</sub>Ph), 97.18 (s, C<sub>Ar</sub>H); 107.47 (s, C<sub>Ar</sub>H); 116.55 (s, C<sub>Ar</sub>H); 119.25 (s, C<sub>Ar</sub>H), 123.70 (s, C<sub>Ar</sub>-OMe), 124.51 (s, C<sub>Ar</sub>-OMe), 125.83 (s, C<sub>Ar</sub>-OMe), 128.21 (s, 2x *o*-Ph), 129.57 (s, *p*-Ph), 129.96 (s, 2x *m*-Ph), 130.76 (s, *ipso*-C<sub>6</sub>H<sub>5</sub>), 133.71 (s), 134.02 (s), 135.32 (s), 139.06 (s), 143.67 (s), 153.88 (s), 155.09 (s, C-OCH<sub>2</sub>Ph), 191.32 (s, CHO), MS (EI,

70eV):  $m/z$  (%) 480 (46) (M), 390 (100) (M(-Ph)); HR MS (EI, 70 eV):  $m/z$  calcd for  $C_{25}H_{21}BrO_5$  calculated: 480.05636; found: 480.05838.

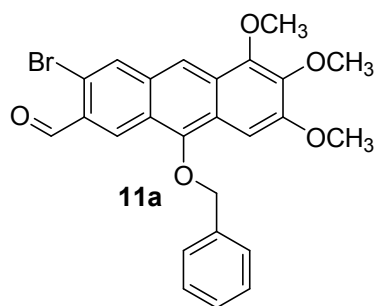

Yield: 79 %; orange solid mp 165 °C,  $^1H$  NMR (200MHz,  $C_6D_6$ , 25 °C, TMS,  $\delta$ ): 3.31 (s,  $OCH_3$ , 3H), 3.77 (s,  $OCH_3$ , 3H), 3.88 (s,  $OCH_3$ , 3H), 4.85 (s,  $OCH_2Ph$ , 2H), 7.06-7.34 (m,  $C_6H_5$ , 5H), 8.50 (s, Ar, 1H), 8.55 (s, Ar, 1H), 8.59 (s, Ar), 10.50 (s, CHO, 1H);  $^{13}C$  NMR (50MHz,  $C_6D_6$ , 25 °C, TMS,  $\delta$ ): 55.81 (s,  $OCH_3$ ), 61.55 (s,  $OCH_3$ ), 61.88 (s,  $OCH_3$ ), 78.10 (s,  $OCH_2Ph$ ), 96.76 (s,  $C_{Ar-H}$ ), 105.63 (s,  $C_{Ar-H}$ ), 120.12 (s,  $C_{Ar-H}$ ), 121.24 (s,  $C_{Ar-H}$ ), 125.15 (s,  $C_{Ar-OMe}$ ), 125.63 (s,  $C_{Ar-OMe}$ ), 125.93 (s,  $C_{Ar-OMe}$ ), 127.62 (s,  $p-Ph$ ), 127.75 (s, 2x  $o-Ph$ ), 129.57 (s, 2x  $m-Ph$ ), 130.61 (s,  $ipso-Ph$ ), 124.71 (s), 138.44 (s), 142.53 (s), 149.02 (s), 149.53 (s), 155.15 (s), 156.28 (s, C- $OCH_2Ph$ ), 191.22 (s, CHO), MS (EI, 70eV):  $m/z$  (%) 480 (2.58) [M]; 391 (100) [M(-Ph)]; HR MS (EI, 70 eV):  $m/z$  calcd for  $C_{25}H_{21}BrO_5$ : 480.05707; found: 480.05792.

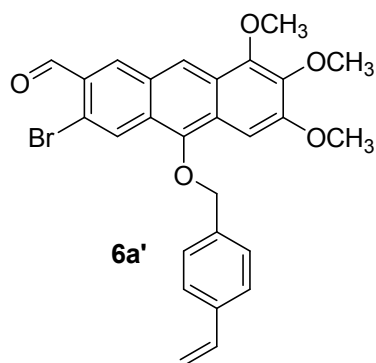

Yield: 99 %; orange solid, mp 142-145 °C;  $^1H$  NMR (200MHz,  $CDCl_3$ , 25 °C, TMS,  $\delta$ ): 3.86 (s,  $OCH_3$ , 3H), 3.99 (s,  $OCH_3$ , 3H), 4.11 (s,  $OCH_3$ , 3H), 5.10 (s,  $OCH_2Ph$ , 2H), 5.30 (d,  $-CH=CH_2$ , 1H), 5.77 (d,  $-CH=CH_2$ , 1H), 6.66-6.68 (q,  $-CH=CH_2$ , 1H), 7.09 (s, Ar, 1H), 7.45 (s, Ar, 4H), 8.31 (s, Ar, 1H), 8.47 (s, Ar, 1H), 8.51 (s, Ar, 1H), 10.39 (s, CHO, 1H);  $^{13}C$  NMR (50MHz,  $CDCl_3$ , 25 °C, TMS,  $\delta$ ): 55.57 (s,  $OCH_3$ ), 61.27 (s,  $OCH_3$ ), 61.53 (s,  $OCH_3$ ), 95.55 (s,  $OCH_2Ph$ ), 114.58 (s,  $-CH=CH_2$ ), 118.88 (s,  $C_{ArH}$ ), 120.17 (s,  $C_{ArH}$ ), 125.29 (s,  $C_{ArH}$ ), 126.29 (s, C), 126.58 (s,  $C_{ArH}$ ), 126.65 (s, 2x  $o-Ph$ ); 128.18 (s, C); 128.43 (s, 2x  $m-Ph$ ); 129.17 (s,  $C_{Ar-OMe}$ ); 134.28 (s,  $C_{Ar-OMe}$ ); 136.26 (s,  $C_{Ar-OMe}$ ), 136.45 (s,  $-CH=CH_2$ ), 137.74 (s, C- $CH=CH_2$ ), 137.92 (s,  $ipso-Ph$ ), 141.22 (s, C), 145.59 (s, C), 147.56 (s, C-CHO), 148.59 (s, C-Br), 154.95 (s, C- $OCH_2Ph$ ), 191.91 (s, CHO); MS (EI, 70eV):  $m/z$  (%) 508.0 (1.88) [M], 391.0 (100) [M, ( $-CH_2C_6H_4CH=CH_2$ )]; HR MS (EI, 70 eV):  $m/z$  calcd for  $C_{27}H_{23}BrO_5$ : 506.07167; found: 506.07350.

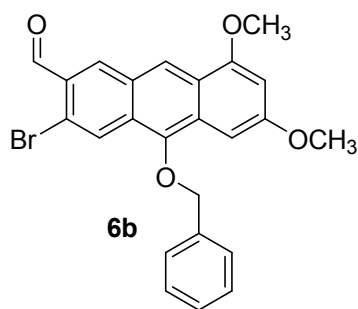

Yield: 89 %; orange solid, mp 130-132 °C;  $^1\text{H}$  NMR (200MHz,  $\text{CDCl}_3$ , 25 °C, TMS,  $\delta$ ): 3.82 (s,  $\text{OCH}_3$ , 3H), 4.01 (s,  $\text{OCH}_3$ , 3H), 5.16 (s,  $\text{OCH}_2\text{Ph}$ , 2H), 6.44 (s, Ar, 1H), 6.93 (s, Ar, 1H), 7.30-7.41 (m,  $\text{C}_6\text{H}_5$ , 5H), 8.62 (s, Ar, 1H), 8.57 (s, Ar, 1H), 8.37 (s, Ar, 1H), 10.44 (s, CHO, 1H);  $^{13}\text{C}$  NMR (50MHz,  $\text{CDCl}_3$ , 25 °C, TMS,  $\delta$ ): 53.81 (s,  $\text{OCH}_3$ ), 55.23 (s,  $\text{OCH}_3$ ), 90.99 (s,  $\text{OCH}_2\text{Ph}$ ), 97.87 (s,  $\text{C}_{\text{Ar}}\text{-H}$ ), 98.33 (s,  $\text{C}_{\text{Ar}}\text{-H}$ ), 102.77 (s,  $\text{C}_{\text{Ar}}\text{-H}$ ), 118.33 (s,  $\text{C}_{\text{Ar}}\text{-H}$ ), 119.56 (s,  $\text{C}_{\text{Ar}}\text{-H}$ ), 123.89 (s,  $\text{C}_{\text{Ar}}$ ), 125.84 (s,  $\text{C}_{\text{Ar}}$ ), 127.57 (s,  $\text{C}_{\text{Ar}}\text{-H}$ ), 128.14 (s,  $\text{C}_{\text{Ar}}\text{-H}$ ), 128.33 (s,  $\text{C}_{\text{Ar}}\text{-H}$ ), 131.58 (s,  $\text{C}_{\text{Ar}}$ ), 134.57 (s,  $\text{C}_{\text{Ar}}$ ), 137.07 (s,  $\text{C}_{\text{Ar}}$ ), 148.08 (s,  $\text{C}_{\text{Ar}}$ ), 156.99 (s,  $\text{C}_{\text{Ar}}$ ), 157.26 (s,  $\text{C}_{\text{Ar}}$ ), 158.41 (s,  $\text{C}_{\text{Ar}}$ ), 159.83 (s,  $\text{C}_{\text{Ar}}$ ), 191.80 (s, CHO); MS (EI, 70eV):  $m/z$  (%) 452,1 (5) [M]; 361 (100) [M, (- $\text{CH}_2\text{Ph}$ )]; HR MS (EI, 70 eV):  $m/z$  calcd for  $\text{C}_{24}\text{H}_{19}\text{BrO}_4$ : 450.04780; found: 450.04778.

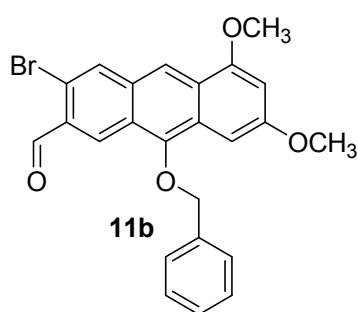

Yield: 90 %; orange solid, mp 136-138 °C;  $^1\text{H}$  NMR (200MHz,  $\text{CDCl}_3$ , 25 °C, TMS,  $\delta$ ): 3.84 (s,  $\text{OCH}_3$ , 3H), 4.09 (s,  $\text{OCH}_3$ , 3H), 5.14 (s,  $\text{OCH}_2\text{Ph}$ , 2H), 6.55 (s, Ar, 1H), 6.99 (s, Ar, 1H), 7.31-7.48 (m,  $\text{C}_6\text{H}_5$ , 5H), 8.68 (s, Ar, 1H), 8.60 (s, Ar, 1H), 8.40 (s, Ar, 1H), 10.49 (s, CHO, 1H);  $^{13}\text{C}$  NMR (50MHz,  $\text{CDCl}_3$ , 25 °C, TMS,  $\delta$ ): 53.90 (s,  $\text{OCH}_3$ ), 56.29 (s,  $\text{OCH}_3$ ), 91.90 (s,  $\text{OCH}_2\text{Ph}$ ), 98.80 (s,  $\text{C}_{\text{Ar}}\text{-H}$ ), 98.20 (s,  $\text{C}_{\text{Ar}}\text{-H}$ ), 103.70 (s,  $\text{C}_{\text{Ar}}\text{-H}$ ), 119.20 (s,  $\text{C}_{\text{Ar}}\text{-H}$ ), 120.55 (s,  $\text{C}_{\text{Ar}}\text{-H}$ ), 124.90 (s,  $\text{C}_{\text{Ar}}$ ), 126.87 (s,  $\text{C}_{\text{Ar}}$ ), 127.17 (s,  $\text{C}_{\text{Ar}}\text{-H}$ ), 129.70 (s,  $\text{C}_{\text{Ar}}\text{-H}$ ), 129.38 (s,  $\text{C}_{\text{Ar}}\text{-H}$ ), 132.58 (s,  $\text{C}_{\text{Ar}}$ ), 135.55 (s,  $\text{C}_{\text{Ar}}$ ), 137.15 (s,  $\text{C}_{\text{Ar}}$ ), 149.99 (s,  $\text{C}_{\text{Ar}}$ ), 157.99 (s,  $\text{C}_{\text{Ar}}$ ), 158.26 (s,  $\text{C}_{\text{Ar}}$ ), 159.49 (s,  $\text{C}_{\text{Ar}}$ ), 160.10 (s,  $\text{C}_{\text{Ar}}$ ), 192.12 (s, CHO); MS (EI, 70eV):  $m/z$  (%) 452,1 (3) [M]; 361 (100) [M, (- $\text{CH}_2\text{Ph}$ )]; HR MS (EI, 70 eV):  $m/z$  calcd for  $\text{C}_{24}\text{H}_{19}\text{BrO}_4$ : 450.04778; found: 450.047802.

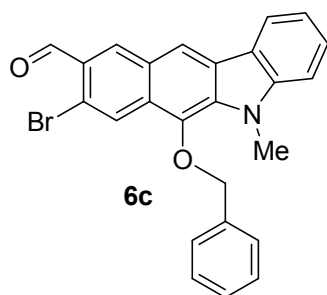

Yield: 89 %; yellow solid, mp 169-170 °C; <sup>1</sup>H NMR (200MHz, CDCl<sub>3</sub>, 25 °C, TMS, δ): 4.11 (s, CH<sub>3</sub>, 3H), 5.17 (s, OCH<sub>2</sub>Ph, 2H), 7.06-7.30 (m, C<sub>6</sub>H<sub>5</sub>, Ar-H, 8H), 8.42 (d, Ar-H, 1H), 8.46 (d, Ar-H, 2H), 8.65 (s, Ar, 1H), 10.48 (s, CHO, 1H); <sup>13</sup>C NMR (50MHz, CDCl<sub>3</sub>, 25 °C, TMS, δ): 31.47 (s, CH<sub>3</sub>), 79.10 (s, OCH<sub>2</sub>Ph), 108.75 (s, C<sub>Ar</sub>H), 117.71 (s, C<sub>Ar</sub>H), 119.50 (s, C<sub>Ar</sub>H), 120.23 (s, C<sub>Ar</sub>H), 121.11 (s, C<sub>Ar</sub>H), 122.52 (s, C<sub>Ar</sub>H), 125.35 (s, C<sub>Ar</sub>H), 126.35 (s, C<sub>Ar</sub>), 127.67 (s, C<sub>Ar</sub>), 127.94 (s, C<sub>Ar</sub>), 128.32 (s, C<sub>Ar</sub>), 128.36 (s, C<sub>Ar</sub>), 128.61 (s, 2x *o*-Ph), 128.70 (s, *p*-Ph), 128.84 (s, 2x *m*-Ph), 129.88 (s, C<sub>Ar</sub>-Br), 133.23 (s, *ipso*-C<sub>6</sub>H<sub>5</sub>), 136.09 (s, C<sub>Ar</sub>), 136.35 (s, C<sub>Ar</sub>), 144.30 (s, C-OCH<sub>2</sub>Ph), 191.91 (s, CHO); MS (EI, 70eV): *m/z* (%) 443 (20) [M]; 353 (100) [M(-CH<sub>2</sub>Ph)]. HR MS (EI, 70 eV): *m/z* calcd for C<sub>25</sub>H<sub>18</sub>BrNO<sub>2</sub>: 444.34689; found: 444.34805.

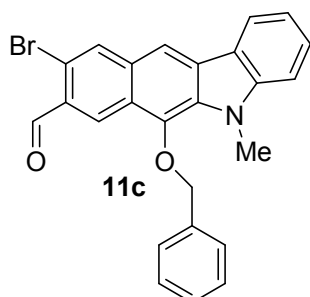

Yield: 79 %; light yellow solid, mp 172-174 °C; <sup>1</sup>H NMR (200MHz, CDCl<sub>3</sub>, 25 °C, TMS, δ): 4.10 (s, CH<sub>3</sub>, 3H), 5.20 (s, OCH<sub>2</sub>Ph, 2H), 7.04-7.30 (m, C<sub>6</sub>H<sub>5</sub>, Ar-H, 8H), 8.44 (d, Ar, 1H), 8.46 (d, Ar, 2H), 8.67 (s, Ar, 1H), 10.50 (s, CHO, 1H); <sup>13</sup>C NMR (50MHz, CDCl<sub>3</sub>, 25 °C, TMS, δ): 31.45 (s, CH<sub>3</sub>), 80.10 (s, OCH<sub>2</sub>Ph), 109.15 (s, C<sub>Ar</sub>H), 116.81 (s, C<sub>Ar</sub>H), 118.90 (s, C<sub>Ar</sub>H), 120.23 (s, C<sub>Ar</sub>H), 121.15 (s, C<sub>Ar</sub>H), 123.02 (s, C<sub>Ar</sub>H), 126.35 (s, C<sub>Ar</sub>H), 127.30 (s, C<sub>Ar</sub>), 127.68 (s, C<sub>Ar</sub>), 127.96 (s, C<sub>Ar</sub>), 127.28 (s, C<sub>Ar</sub>), 127.33 (s, C<sub>Ar</sub>), 128.61 (s, 2x *o*-Ph), 128.70 (s, *p*-Ph), 129.84 (s, 2x *m*-Ph), 129.81 (s, C<sub>Ar</sub>-Br), 137.28 (s, *ipso*-C<sub>6</sub>H<sub>5</sub>), 136.07 (s, C<sub>Ar</sub>), 138.38 (s, C<sub>Ar</sub>), 145.31 (s, C-OCH<sub>2</sub>Ph), 192.92 (s, CHO); MS (EI, 70eV): *m/z* (%) 443 (25) [M]; 353 (100) [M(PhCH<sub>2</sub>)]. HR MS (EI, 70 eV): *m/z* calcd for C<sub>25</sub>H<sub>18</sub>BrNO<sub>2</sub>: 444.34689; found: 444.34834.

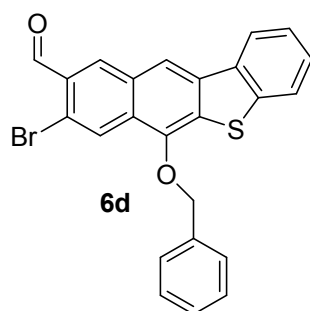

Yield: 15 %; yellow solid, mp 182-184 °C, <sup>1</sup>H NMR (200MHz, CDCl<sub>3</sub>, 25 °C, TMS, δ): 5.37 (s, OCH<sub>2</sub>Ph, 2H), 7.49 (d, Ar, 2H), 7.49-7.70 (m, C<sub>6</sub>H<sub>5</sub>, 5H), 7.89 (m, Ar, 1H), 8.23 (m, Ar, 1H), 8.45 (s, Ar, 1H), 8.49 (s, Ar, 1H), 8.70 (s, Ar, 1H), 10.60 (s, CHO, 1H); <sup>13</sup>C NMR (50MHz, CDCl<sub>3</sub>, 25 °C, TMS, δ): 75.34 (s, OCH<sub>2</sub>Ph), 118.11 (s, C<sub>Ar</sub>H), 120.21 (s, C<sub>Ar</sub>H), 122.44 (s, C<sub>Ar</sub>H), 123.04 (s, C<sub>Ar</sub>H), 125.20 (s, C<sub>Ar</sub>H), 126.26 (s, C<sub>Ar</sub>H), 128.50 (s, 2x *o*-Ph), 128.74 (s, *p*-Ph), 129.88 (s, 2x *m*-Ph), 130.76 (s, C<sub>Ar</sub>), 133.71 (s, C<sub>Ar</sub>), 134.02 (s, C<sub>Ar</sub>), 135.32 (s, C<sub>Ar</sub>), 139.06 (s, C<sub>Ar</sub>), 143.67 (s, C<sub>Ar</sub>), 146.45 (s, C<sub>Ar</sub>), 149.55 (s, C<sub>Ar</sub>), 153.88 (s, C<sub>Ar</sub>), 155.09 (s, C<sub>Ar</sub>), 191.89 (s, CHO), MS (EI, 70eV): *m/z* (%) 382 (33) [M]; 305.9 (100) [M(-Ph)]; HR MS (EI, 70 eV): *m/z* calcd for C<sub>24</sub>H<sub>15</sub>BrO<sub>2</sub>S: 445.99720; found: 445.99805.

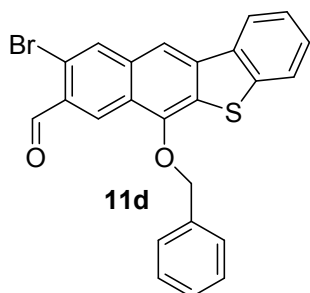

Yield: 18 %; yellow solid, mp 193-195 °C; <sup>1</sup>H NMR (200MHz, CDCl<sub>3</sub>, 25 °C, TMS, δ): 5.35 (s, OCH<sub>2</sub>Ph, 2H), 7.44 (d, Ar, 2H), 7.50-7.78 (m, C<sub>6</sub>H<sub>5</sub>, 5H), 7.88 (m, Ar, 1H), 8.25 (m, Ar, 1H), 8.42 (s, Ar, 1H), 8.51 (s, Ar, 1H), 8.65 (s, Ar, 1H), 10.52 (s, CHO, 1H); <sup>13</sup>C NMR (50MHz, CDCl<sub>3</sub>, 25 °C, TMS, δ): 75.34 (s, OCH<sub>2</sub>Ph), 118.11 (s, C<sub>Ar</sub>H), 120.21 (s, C<sub>Ar</sub>H), 122.44 (s, C<sub>Ar</sub>H), 123.04 (s, C<sub>Ar</sub>H), 125.20 (s, C<sub>Ar</sub>H), 126.26 (s, C<sub>Ar</sub>H), 128.50 (s, 2x *o*-Ph), 128.74 (s, *p*-Ph), 129.88 (s, 2x *m*-Ph), 130.76 (s, C<sub>Ar</sub>), 133.71 (s, C<sub>Ar</sub>), 134.02 (s, C<sub>Ar</sub>), 135.32 (s, C<sub>Ar</sub>), 139.06 (s, C<sub>Ar</sub>), 140.33 (s, C<sub>Ar</sub>), 142.11 (s, C<sub>Ar</sub>), 143.67 (s, C<sub>Ar</sub>), 153.88 (s, C<sub>Ar</sub>), 155.09 (s, C<sub>Ar</sub>), 191.89 (s, CHO); MS (EI, 70eV): *m/z* (%) 382 (26) [M]; 305.9 (100) [M, (-Ph)] HR MS (EI, 70 eV): *m/z* calcd for C<sub>24</sub>H<sub>15</sub>BrO<sub>2</sub>S: 445.99720; found: 445.99650.

\*\*\* NMR LAB \*\*\*  
 \*\*AVANCE DRX500\*\*  
 Tel: 042 6803 307

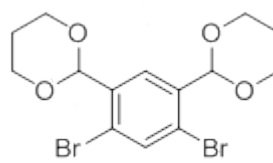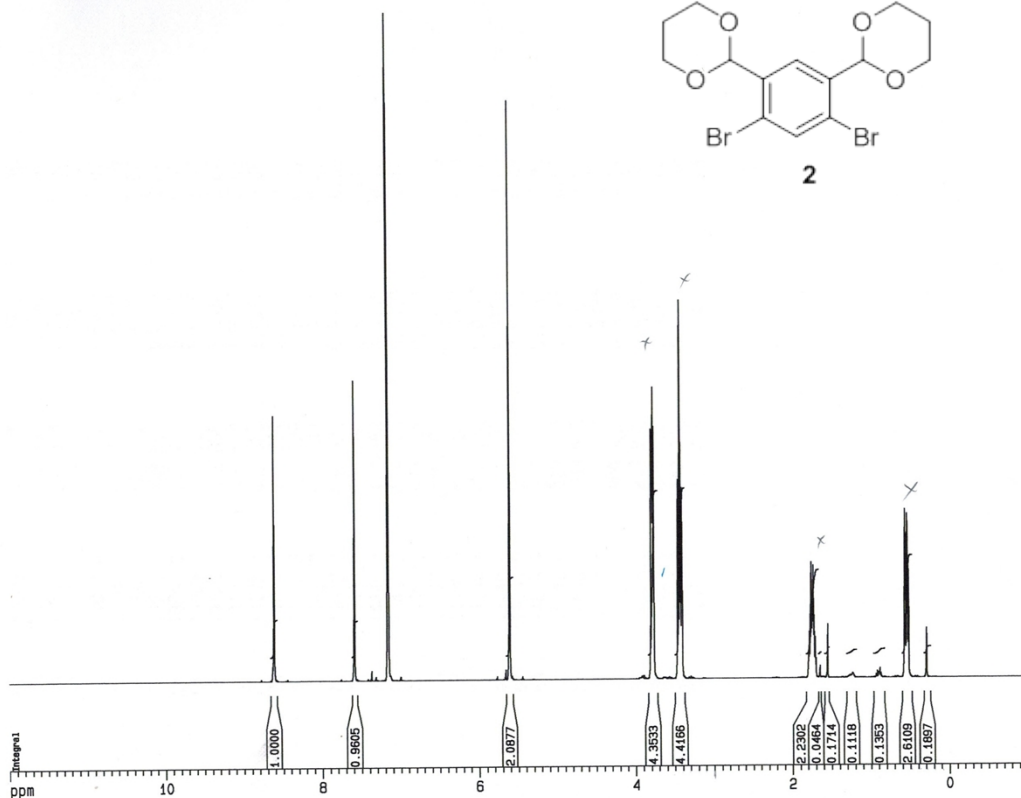

Current Data Parameters  
 NAME skal10806  
 EXPNO 1  
 PROCNO 1  
 DU /z  
 USER service

F2 - Acquisition Parameters  
 Date\_ 20090608  
 Time 16.33  
 INSTRUM drx500  
 PROBHD 5 mm Multinu  
 PULPROG zg30.sk  
 TD 32768  
 SOLVENT C6D6  
 NS 24  
 DS 0  
 RG 128  
 SMH 11261.262 Hz  
 FIDRES 0.343666 Hz  
 AQ 1.4549491 sec  
 DW 44.400 usec  
 DE 15.00 usec  
 TE 295.0 K  
 D1 1.00000000 sec

===== CHANNEL f1 =====  
 NUC1 1H  
 P1 8.38 usec  
 PL1 0.00 dB  
 SFO1 500.1347512 MHz

F2 - Processing parameters  
 SI 16384  
 SF 500.1299977 MHz  
 WDW EM  
 SSB 0  
 LB 0.20 Hz  
 GB 0  
 PC 1.00

1D NMR plot parameters  
 CX 21.50 cm  
 F1P 12.000 ppp  
 F1 6001.56 Hz  
 F2P -1.000 ppp  
 F2 -500.13 Hz  
 PPMCM 0.60465 ppp  
 HZCM 302.40417 Hz/

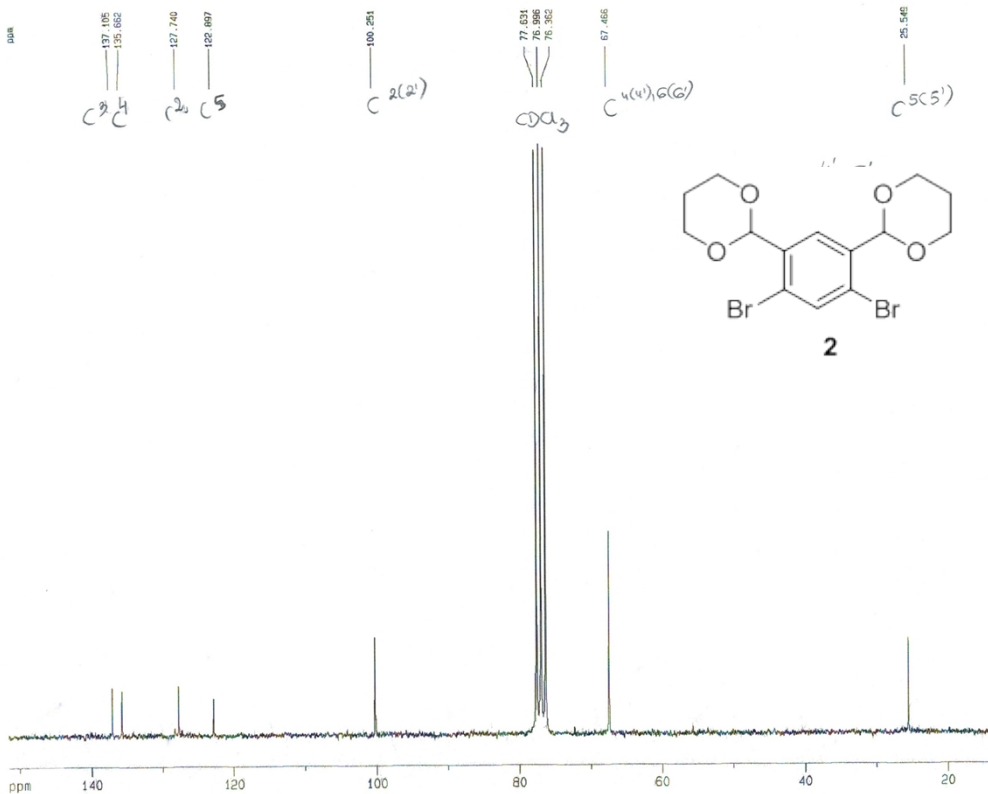

\*\*\* NMR LAB \*\*\*  
 \*\* AVANCE AV 200 \*\*  
 Tel: 0426803 226

Current Data Parameters  
 NAME skal1205  
 EXPNO 1  
 PROCNO 1  
 DU C/u  
 USER service Gwnt

F2 - Acquisition Parameters  
 Date\_ 20090512  
 Time 20.57  
 INSTRUM AV\_200  
 PROBHD 5 mm QNP 1H/1  
 PULPROG zgpg30  
 TD 32768  
 SOLVENT CDCl3  
 NS 12695  
 DS 2  
 SWH 12345.679 Hz  
 FIDRES 0.376790 Hz  
 AQ 1.3271540 sec  
 RG 8192  
 DW 40.500 usec  
 DE 7.00 usec  
 TE 297.2 K  
 D1 2.00000000 sec  
 D11 0.03000000 sec  
 DELTA 1.88888888 sec  
 NDCREST 0.00000000 sec  
 NDCRRC 0.01500000 sec

===== CHANNEL f1 =====  
 NUC1 13C  
 P1 4.75 usec  
 PL1 1.00 dB  
 SFO1 50.3358983 MHz

===== CHANNEL f2 =====  
 CPDPRG2 waltz16  
 NUC2 1H  
 P1P2 100.00 usec  
 PL2 -1.00 dB  
 PL12 22.10 dB  
 PL13 26.00 dB  
 SFO2 200.1610008 MHz

F2 - Processing parameters  
 SI 32768  
 SF 50.3302736 MHz  
 WDW EN  
 SSB 0  
 LB 2.00 Hz  
 GB 0  
 PC 1.40

1D NMR plot parameters  
 CX 22.50 cm  
 CY 13.50 cm  
 F1P 161.582 ppp  
 F1 7629.15 Hz  
 F2P 13.680 ppp  
 F2 688.54 Hz  
 PPMCM 6.12894 ppp/cm  
 HZCM 308.47137 Hz/cm

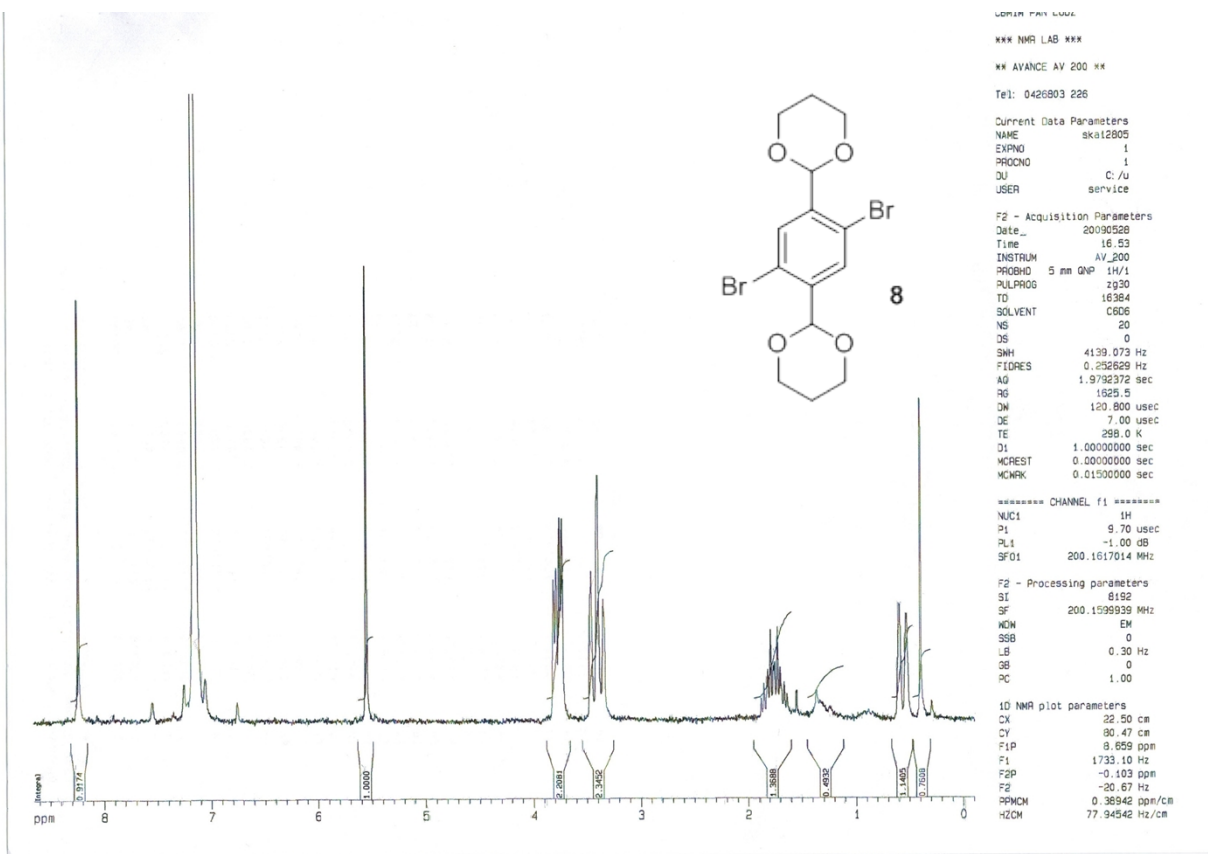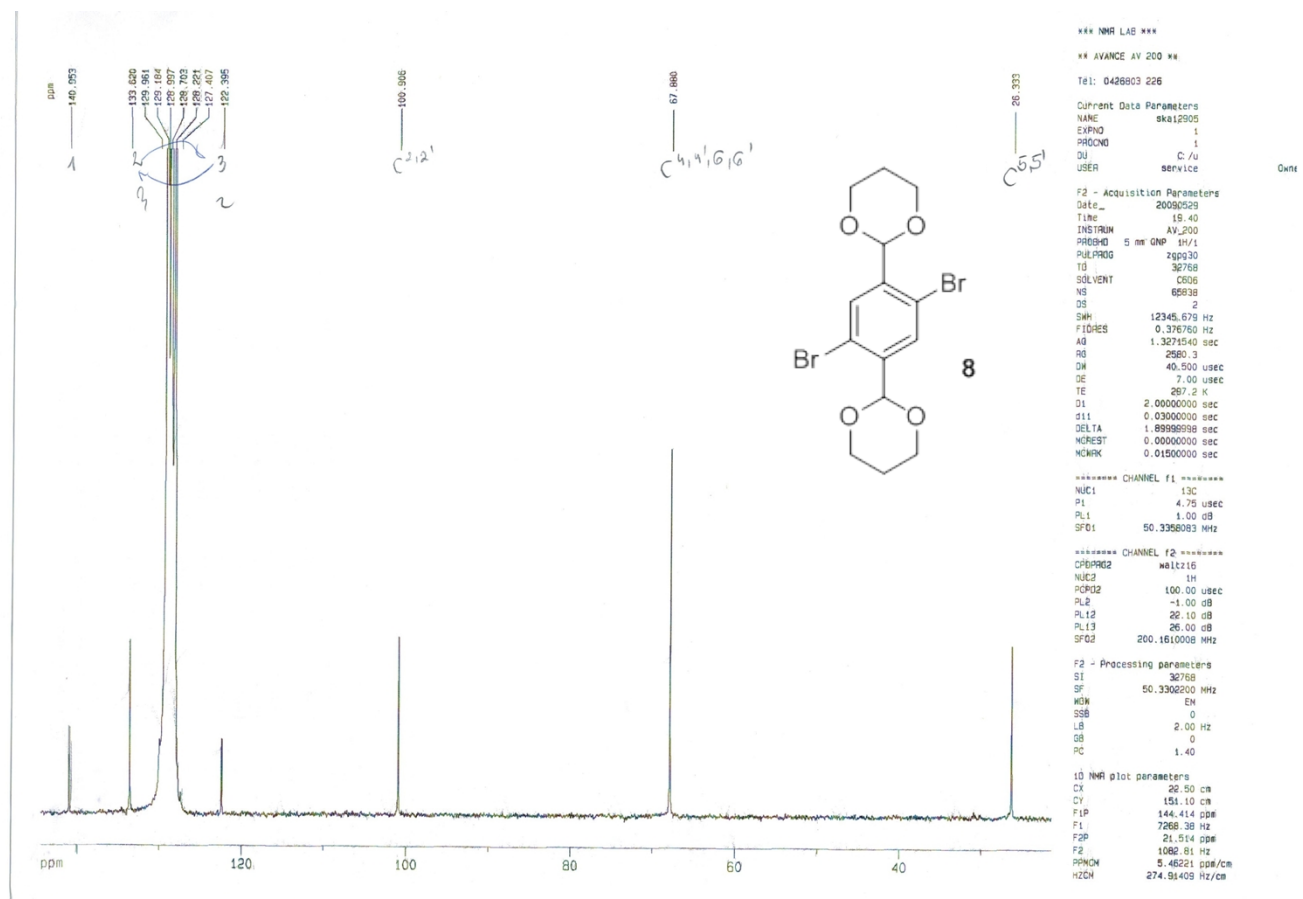



CBMIM PAN L002

\*\*\* NMR LAB \*\*\*

\*\* AVANCE AV 200 \*\*

Tel: 0426803 226

Current Data Parameters

NAME sk10411  
 EXPNO 2  
 PROCNO 1  
 DU C:/u  
 USER service

F2 - Acquisition Parameters

Date\_ 20101104  
 Time 17.26  
 INSTRUM AV\_200  
 PROBHD 5 mm GNP 1H/1  
 PULPROG zg30  
 TD 16384  
 SOLVENT DMS-D6  
 NS 18  
 DS 0  
 SWH 4139.073 Hz  
 FIDRES 0.252629 Hz  
 AQ 1.9732372 sec  
 RG 456.1  
 DN 120.800 usec  
 DE 7.00 usec  
 TE 295.3 K  
 D1 1.0000000 sec  
 MCREST 0.0000000 sec  
 MCNRK 0.0150000 sec

\*\*\*\*\* CHANNEL f1 \*\*\*\*\*

NUC1 1H  
 P1 9.70 usec  
 PL1 -1.00 dB  
 SF01 200.1617014 MHz

F2 - Processing parameters

SI 8192  
 SF 200.1600052 MHz  
 MDW EM  
 SSB 0  
 LB 0.30 Hz  
 GB 0  
 PC 1.00

1D NMR plot parameters

CX 22.50 cm  
 CY 13.50 cm  
 F1P 9.265 ppm  
 F1 1655.07 Hz  
 F2P -0.245 ppm  
 F2 -48.98 Hz  
 PPMCM 0.37838 ppm/cm

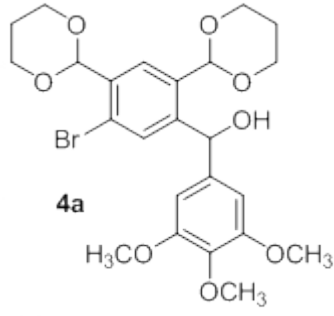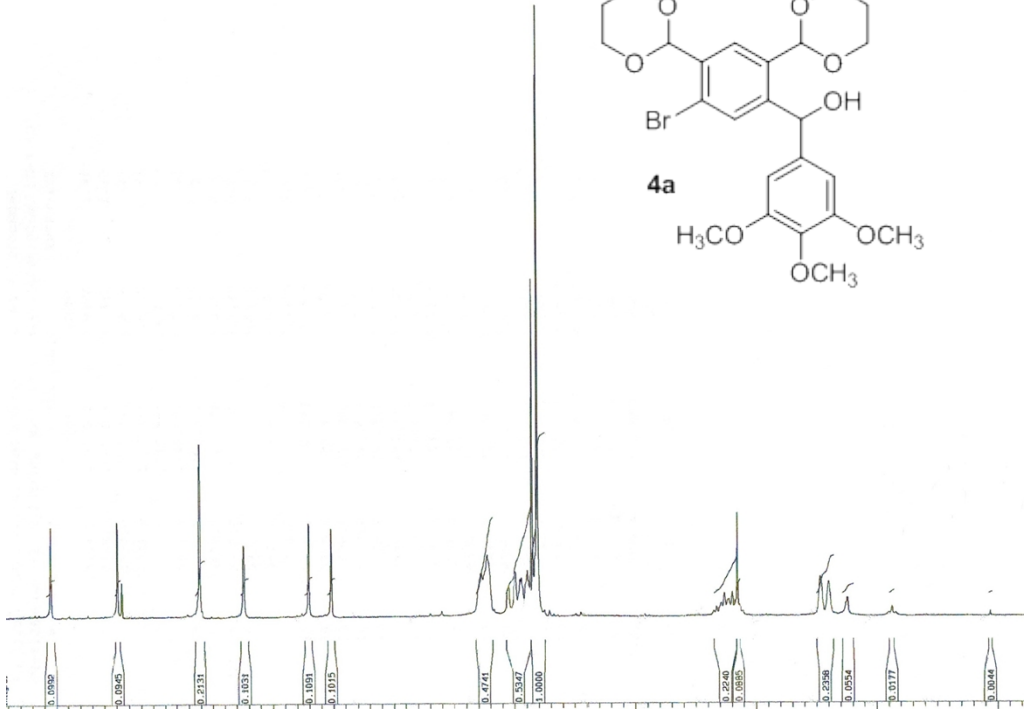

CBMIM PAN L002

\*\*\* NMR LAB \*\*\*

\*\* AVANCE AV 200 \*\*

Tel: 0426803 226

Current Data Parameters

NAME sk11008  
 EXPNO 6  
 PROCNO 1  
 DU C:/u  
 USER service

F2 - Acquisition Parameters

Date\_ 20090818  
 Time 20.06  
 INSTRUM AV\_200  
 PROBHD 5 mm GNP 1H/1  
 PULPROG zgpg30  
 TD 32768  
 SOLVENT DMS-D6  
 NS 14142  
 DS 2  
 SWH 12345.678 Hz  
 FIDRES 0.376760 Hz  
 AQ 1.3271540 sec  
 RG 9195.2  
 DN 40.500 usec  
 DE 7.00 usec  
 TE 295.3 K  
 D1 2.0000000 sec  
 MCREST 0.0300000 sec  
 MCNRK 1.8999998 sec  
 D2 0.0000000 sec  
 D3 0.0150000 sec

\*\*\*\*\* CHANNEL f1 \*\*\*\*\*

NUC1 13C  
 P1 4.75 usec  
 PL1 -1.00 dB  
 SF02 50.3358083 MHz

\*\*\*\*\* CHANNEL f2 \*\*\*\*\*

CPDPRG2 waltz16  
 NUC2 1H  
 PCPD2 100.00 usec  
 PL2 -1.00 dB  
 PL12 22.10 dB  
 PL13 26.00 dB  
 SF02 200.1610008 MHz

F2 - Processing parameters

SI 32768  
 SF 50.3302900 MHz  
 MDW EM  
 SSB 0  
 LB 2.00 Hz  
 GB 0  
 PC 1.40

1D NMR plot parameters

CX 22.50 cm  
 CY 597.61 cm  
 F1P 161.759 ppm  
 F1 8141.36 Hz  
 F2P 13.382 ppm  
 F2 273.44 Hz

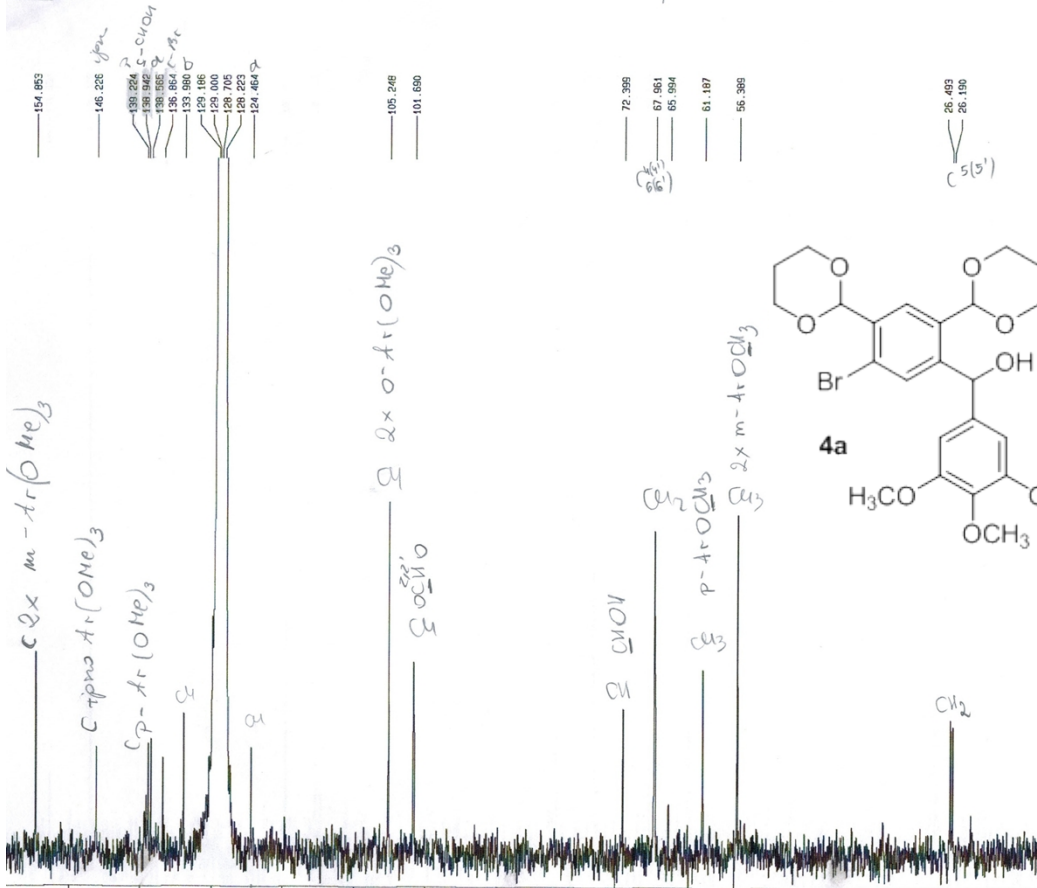

xmje na afunije

CBMIM PAN LOZ

\*\*\* NMR LAB \*\*\*

\*\* AVANCE AV 200 \*\*

Tel: 0426803 226

Current Data Parameters

NAME skai0406  
EXPNO 1  
PROCNO 1  
DU C:/u  
USER service

F2 - Acquisition Parameters

Date\_ 20090604  
Time 17.06  
INSTRUM AV\_200  
PROBHD 5 mm QNP 1H/1  
PULPROG zgpg30  
TD 16384  
SOLVENT CDCl3  
NS 20  
DS 0  
SWH 4139.073 Hz  
FIDRES 0.252629 Hz  
AQ 1.9792372 sec  
RG 574.7  
DM 120.800 usec  
DE 7.00 usec  
TE 297.5 K  
D1 1.0000000 sec  
MCREST 0.0000000 sec  
MCWRR 0.0150000 sec

===== CHANNEL f1 =====

NUC1 1H  
P1 9.70 usec  
PL1 -1.00 dB  
SFO1 200.1617014 MHz

F2 - Processing parameters

SI 8192  
SF 200.1599936 MHz  
WDW EM  
SSB 0  
LB 0.30 Hz  
GB 0  
PC 1.00

ID NMR plot parameters

CX 22.50 cm  
CY 13.50 cm  
F1P 0.380 ppm  
F1 1673.36 Hz  
F2P -0.336 ppm  
F2 -67.61 Hz  
PPMCH 0.36657 ppm/cm

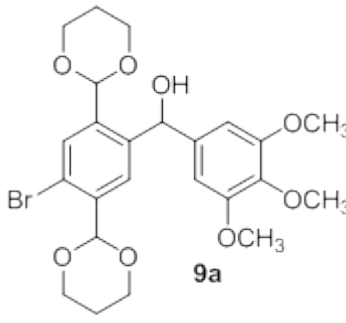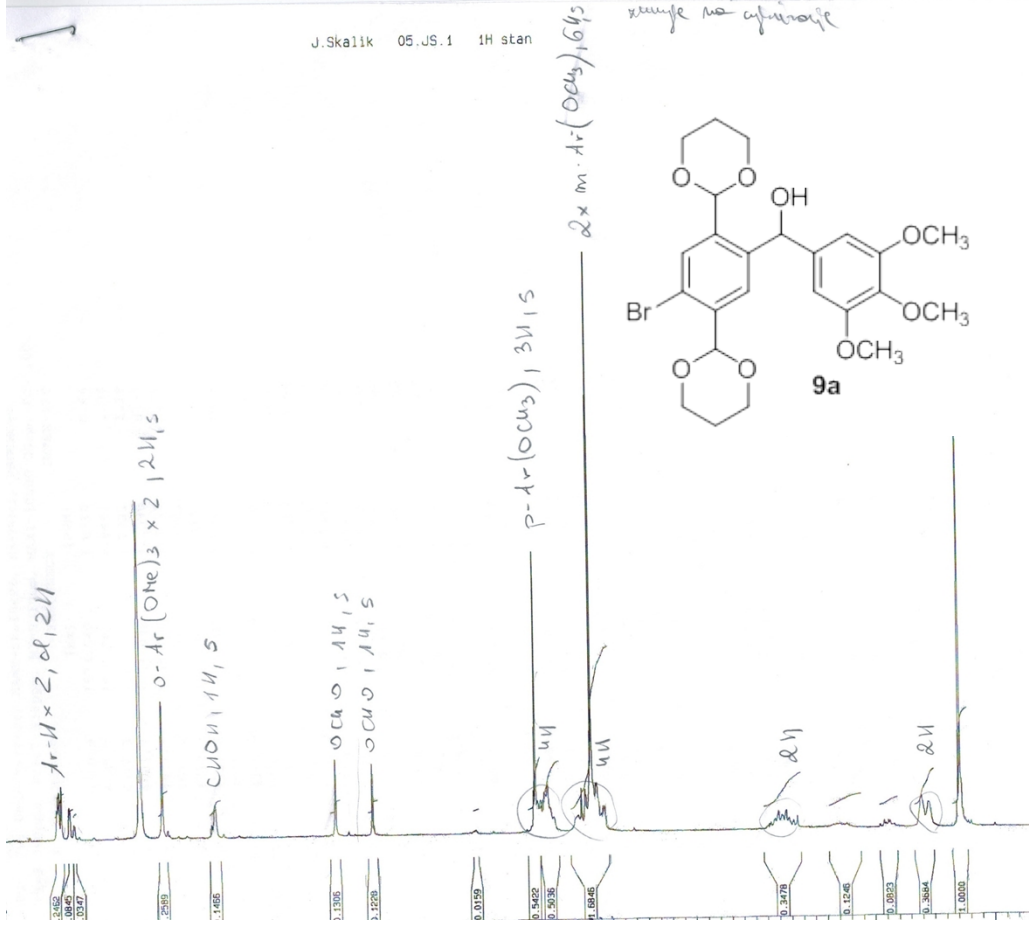

\*\*\* NMR LAB \*\*\*

\*\* AVANCE AV 200 \*\*

Tel: 0426803 226

Current Data Parameters

NAME skai0506  
EXPNO 1  
PROCNO 1  
DU C:/u  
USER service

F2 - Acquisition Parameters

Date\_ 20090616  
Time 15.31  
INSTRUM AV\_200  
PROBHD 5 mm QNP 1H/1  
169630  
32768  
C506  
1246  
2  
15.679 Hz  
176760 Hz  
174540 sec  
1896.3  
10.550 usec  
7.00 usec  
297.0 K  
100000 sec  
100000 sec  
100000 sec  
100000 sec

F2 - Processing parameters

SI 32768  
SF 50.3302034 MHz  
WDW EM  
SSB 0  
LB 2.00 Hz  
GB 0  
PC 1.40

ID NMR plot parameters

CX 22.50 cm  
CY 110.04 cm  
F1P 171.588 ppm  
F1 8656.18 Hz  
F2P -2.989 ppm  
F2 -149.42 Hz  
PPMCH 7.77584 ppm/cm  
HZCM 391.35689 Hz/cm

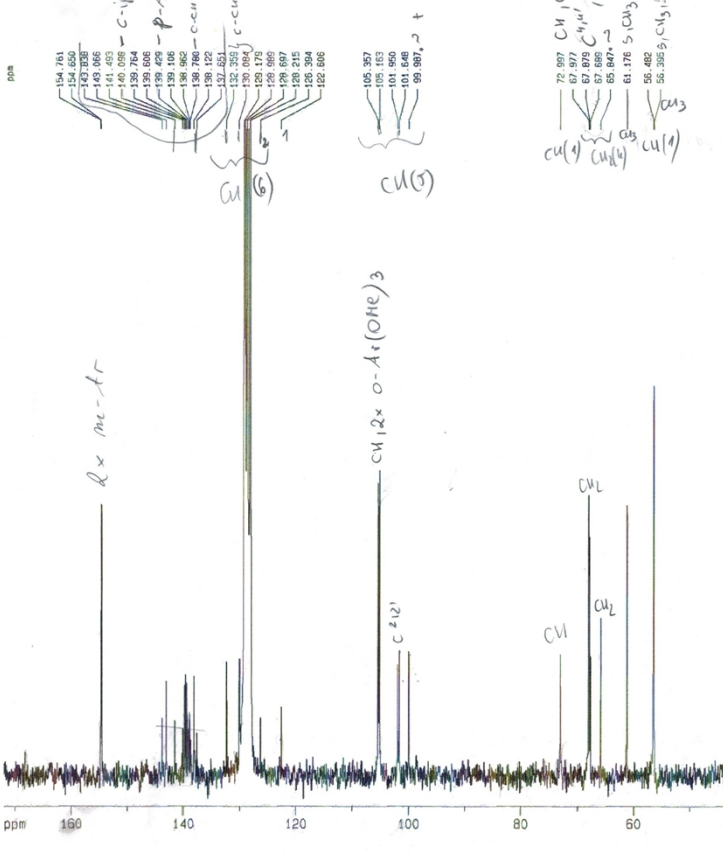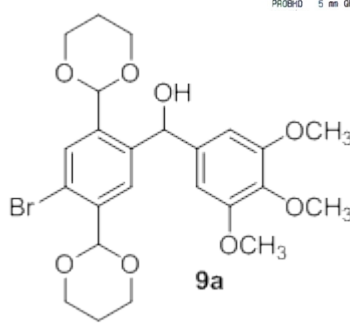

7/11/2012 2:20:37 PM

|                        |                      |                      |                                     |                       |                        |              |
|------------------------|----------------------|----------------------|-------------------------------------|-----------------------|------------------------|--------------|
| Acquisition Time (sec) | 1.9792               | Comment              | Skalik Joanna 2 z kolumny dimetoksy | Date                  | 11 Jul 2012 13:58:56   |              |
| Date Stamp             | 11 Jul 2012 13:58:56 | File Name            | C:\Users\User\Desktop\186.JS        | Frequency (MHz)       | 200.16                 |              |
| Nucleus                | <sup>1</sup> H       | Number of Transients | 16                                  | Original Points Count | 8192                   |              |
| Points Count           | 8192                 | Pulse Sequence       | zg30                                | Receiver Gain         | 228.10                 |              |
| Spectrum Offset (Hz)   | 1696.7002            | Spectrum Type        | STANDARD                            | SW(cyclical) (Hz)     | 4139.07                |              |
|                        |                      |                      | Sweep Width (Hz)                    | 4138.57               | Temperature (degree C) | 21.100       |
|                        |                      |                      |                                     |                       | Owner                  | root         |
|                        |                      |                      |                                     |                       | Solvent                | CHLOROFORM-d |

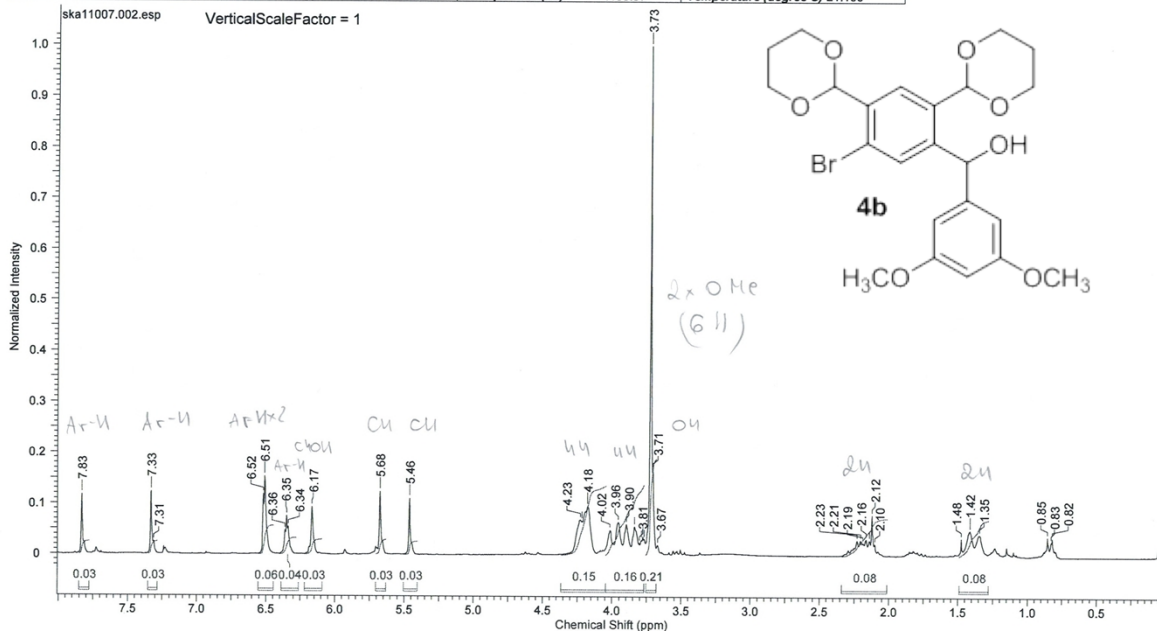

j. skalik = 186.JS =  
A-13C.stan CDCl3

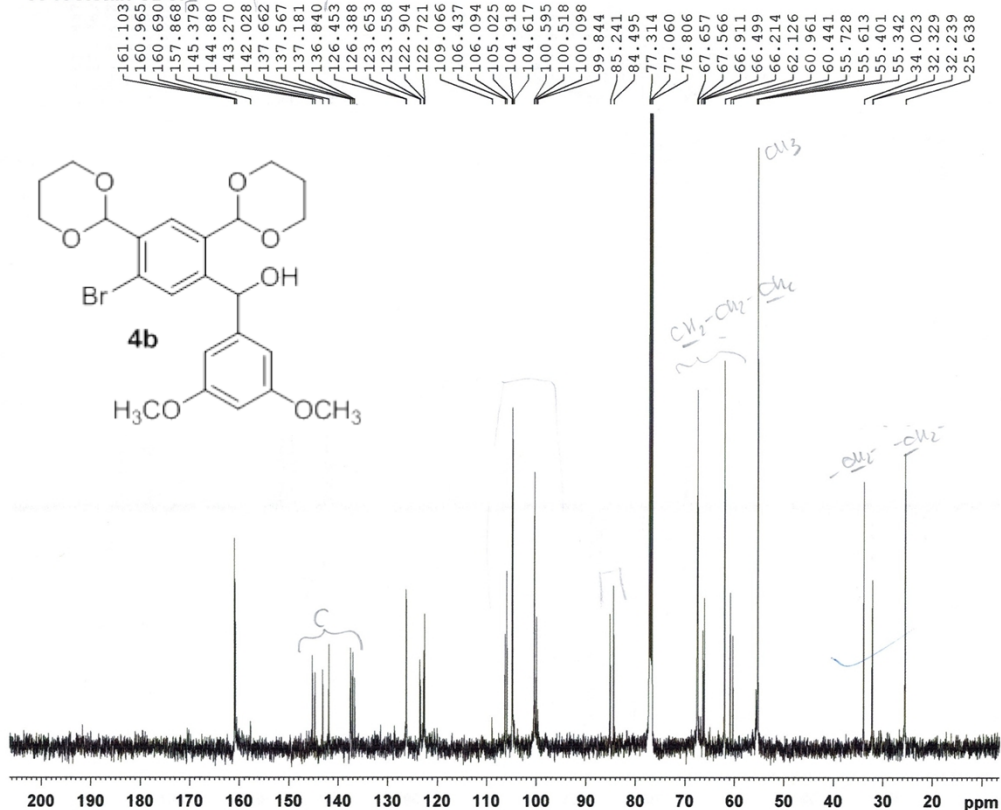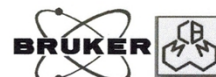

\*\*\*CBMIM PAN LODZ\*\*  
\*\*\*\* NMR LAB \*\*\*\*  
\*\*AV III 500 MHz\*\*  
Tel:042 6803 307

Current Data Parameters  
DATEPATH C:\NMR\_Data\Service\CBM\_2012  
NAME skal1607  
EXENO 2  
PROCNO 1

F2 - Acquisition Parameters  
Date\_ 20120716  
Time 15.27  
INSTRUM AV III 500  
PROBHD 5 mm Multinucl  
PULPROG zgpg30  
TD 65536  
SOLVENT CDCl3  
NS 2560  
DS 4  
SWH 36057.691 Hz  
FIDRES 0.550197 Hz  
AQ 0.9088159 sec  
RG 1620  
DW 13.867 usec  
DE 6.50 usec  
TE 295.0 K  
D1 2.00000000 sec  
D11 0.03000000 sec  
TDO 10

==== CHANNEL f1 =====  
NUC1 <sup>13</sup>C  
P1 11.00 usec  
PLW1 160.0000000 W  
SFO1 125.7728788 MHz

==== CHANNEL f2 =====  
CPDPRG2 waltz16  
NUC2 <sup>1</sup>H  
PCPD2 100.00 usec  
PLW2 10.00000000 W  
PLW12 0.08556300 W  
PLW13 0.08556300 W  
SFO2 500.1324005 MHz

F2 - Processing parameters  
SI 32768  
SF 125.7577911 MHz  
WDW EM  
SSB 0  
LB 2.00 Hz  
GB 0  
PC 1.40  
SR 2.14 Hz

This report was created by ACD/NMR Processor Academic Edition. For more information go to [www.acdlabs.com/nmrproc/](http://www.acdlabs.com/nmrproc/)  
**alkohol p- z dimetoksybenzaldehydem**

2/18/2013 3:15:02 PM

| Acquisition Time (sec) | 1.9792               | Comment              | JS litowanie p- z dimetoksy          | Date                   | 18 Feb 2013 11:01:36 |
|------------------------|----------------------|----------------------|--------------------------------------|------------------------|----------------------|
| Date Stamp             | 18 Feb 2013 11:01:36 | File Name            | C:\Users\User\Desktop\lka11802\1\fid | Frequency (MHz)        | 200.16               |
| Nucleus                | 1H                   | Number of Transients | 64                                   | Origin                 | spect                |
| Points Count           | 8192                 | Pulse Sequence       | zgpg30                               | Receiver Gain          | 181.00               |
| Spectrum Offset (Hz)   | 1696.7002            | Spectrum Type        | STANDARD                             | SW(cyclical) (Hz)      | 4139.07              |
|                        |                      |                      |                                      | Temperature (degree C) | 18.100               |

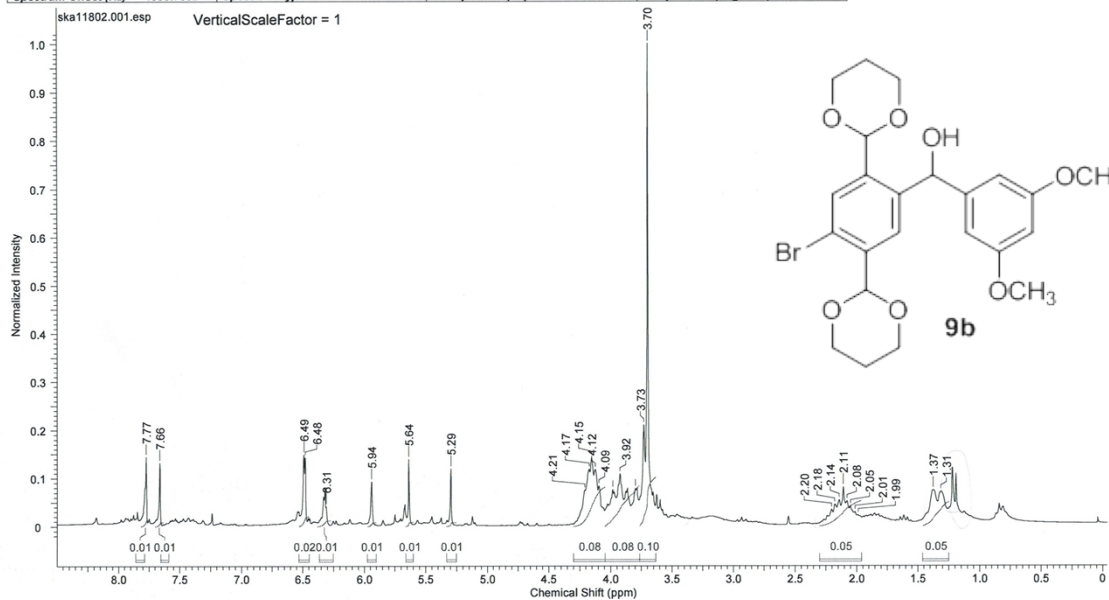

This report was created by ACD/NMR Processor Academic Edition. For more information go to [www.acdlabs.com/nmrproc/](http://www.acdlabs.com/nmrproc/)  
**alkohol p- z dimetoksybenzaldehydem 13C**

2/19/2013 12:13:20 PM

| Acquisition Time (sec) | 1.3271               | Comment              | 5 mm QNP 1H/13C/31P/19F Z3183/005 | Date                   | 19 Feb 2013 11:33:36 |
|------------------------|----------------------|----------------------|-----------------------------------|------------------------|----------------------|
| Date Stamp             | 19 Feb 2013 11:33:36 | File Name            | C:\Users\User\Desktop\1\fid       | Frequency (MHz)        | 50.34                |
| Nucleus                | 13C                  | Number of Transients | 512                               | Origin                 | spect                |
| Points Count           | 16384                | Pulse Sequence       | zgpg30                            | Receiver Gain          | 4096.00              |
| Spectrum Offset (Hz)   | 5536.0000            | Spectrum Type        | STANDARD                          | SW(cyclical) (Hz)      | 12245.00             |
|                        |                      |                      |                                   | Temperature (degree C) | 19                   |

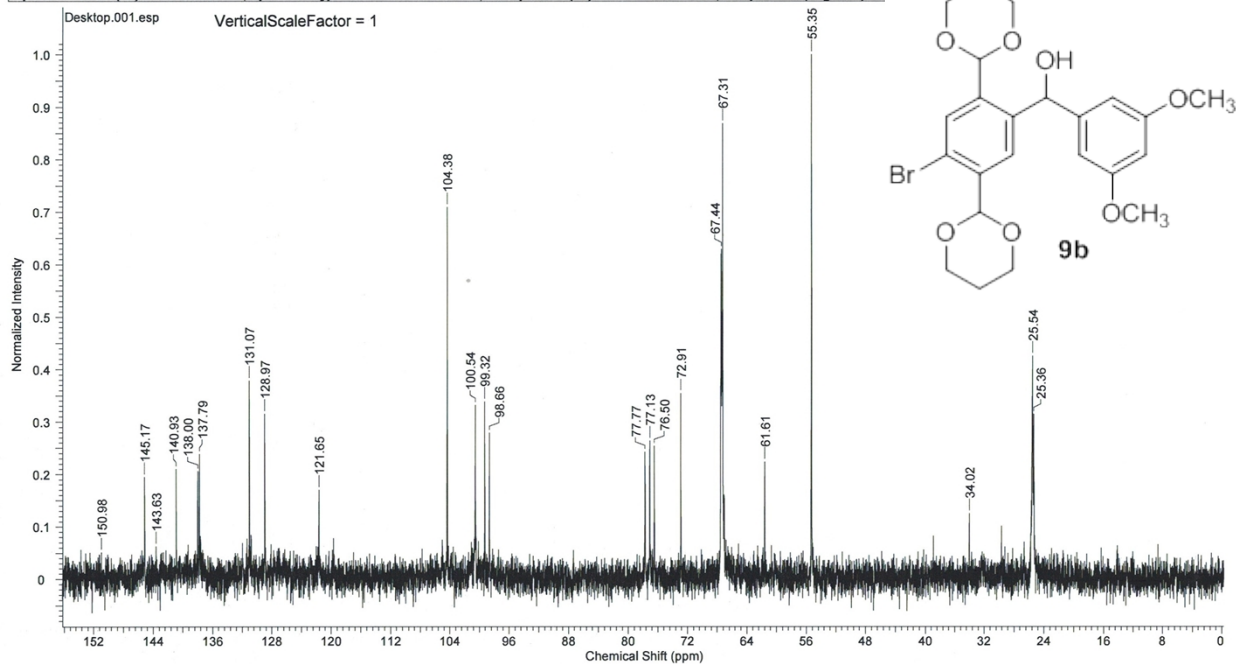



10/1/2013 9:07:51 AM  
 Skalik J. m-Indoh

| Acquisition Time (sec) | 1.9792               | Comment              | Skalik J. m-Indoh                 | Date                   | 30 Sep 2013 15:52:00 |
|------------------------|----------------------|----------------------|-----------------------------------|------------------------|----------------------|
| Date Stamp             | 30 Sep 2013 15:52:00 | File Name            | C:\Users\User\Desktop\m-IndOH\fid | Frequency (MHz)        | 200.16               |
| Nucleus                | <sup>1</sup> H       | Number of Transients | 32                                | Origin                 | spect                |
| Points Count           | 8192                 | Pulse Sequence       | zg30                              | Receiver Gain          | 406.40               |
| Spectrum Offset (Hz)   | 1696.7002            | Spectrum Type        | STANDARD                          | SW(cyclical) (Hz)      | 4139.07              |
|                        |                      |                      |                                   | Solvent                | CHLOROFORM-d         |
|                        |                      |                      |                                   | Sweep Width (Hz)       | 4138.57              |
|                        |                      |                      |                                   | Temperature (degree C) | 19.400               |

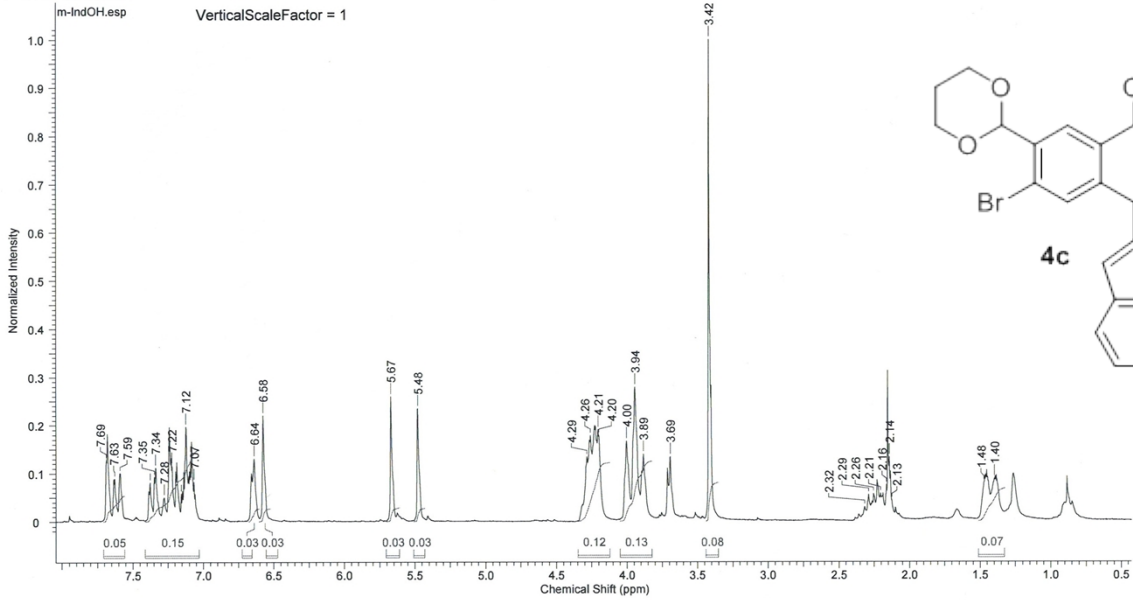

J.Skalik 55.5S <sup>13</sup>C stan

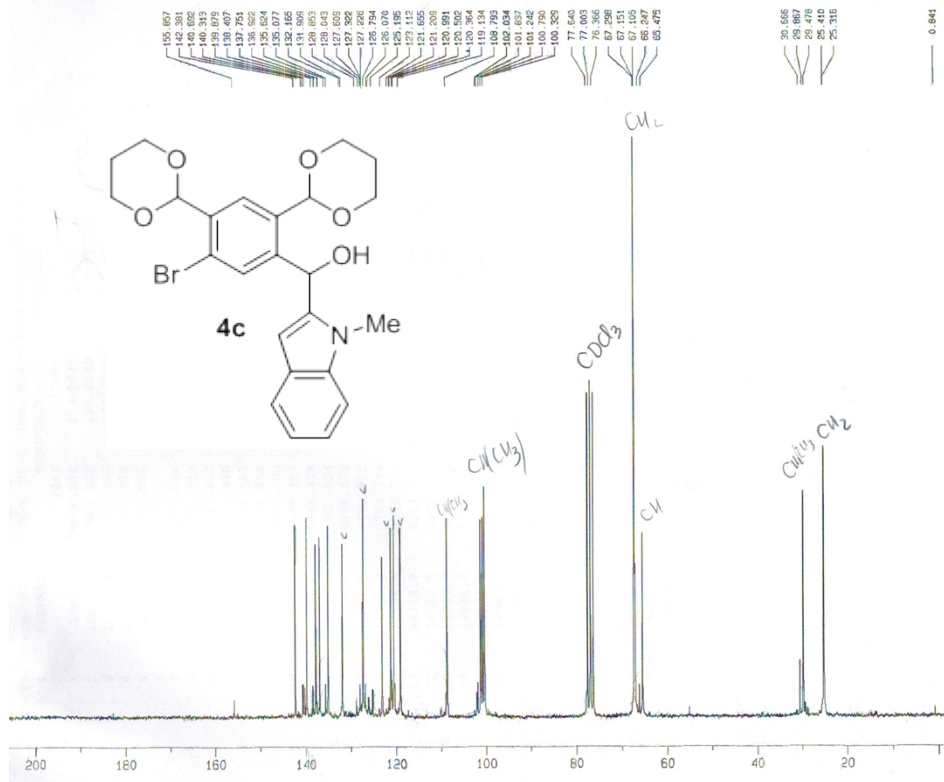

CSHIN PAN LOOZ

\*\*\* NMR LAB \*\*\*

\*\* AVANCE AV 200 \*\*

Tel: 0426603 226

Current Data Parameters

NAME sk21003

EXPNO 1

PROBHD 1H/1

PULPROG zgpg30

TD 32768

SOLVENT CDCl3

NS 11801

DS 2

SWH 12345.678 Hz

FIDRES 0.376760 Hz

AQ 1.3271540 sec

RG 13004

DA 40.500 usec

DE 7.00 usec

TE 297.7 K

D1 2.0000000 sec

d11 0.0300000 sec

DELTA 1.8999998 sec

WCHEST 0.0000000 sec

NCMR 0.0150000 sec

\*\*\*\*\* CHANNEL f1 \*\*\*\*\*

NUC1 <sup>13</sup>C

P1 4.75 usec

PL1 1.00 dB

SFO1 50.3308083 MHz

\*\*\*\*\* CHANNEL f2 \*\*\*\*\*

CPDPRG2 waltz16

NUC2 <sup>1</sup>H

PCPD2 100.00 usec

PL2 -1.00 dB

PL12 22.10 dB

PL13 26.00 dB

SFO2 200.1610008 MHz

F2 - Processing parameters

SF 32768

SF 50.3308072 MHz

MCW EN

SSB 0

LB 2.00 Hz

GB 0

PC 1.40

LD NMR plot parameters

CX 22.50 cm

CY 13.50 cm

F1P 210.830 ppm

F1 10601.06 Hz

F2P -2.226 ppm

F2 -112.02 Hz

PCWD 8.48225 ppm/cm

HZCM 476.13998 Hz/cm

Current Data Parameters  
 NAME skai0803  
 EXPNO 1  
 PROCNO 1  
 DU C:/u  
 USER service

F2 - Acquisition Parameters  
 Date\_ 20100308  
 Time 16.33  
 INSTRUM AV\_200  
 PROBHD 5 mm QNP 1H/1  
 PULPROG zgpg30  
 TD 16384  
 SOLVENT CDCl3  
 NS 20  
 DS 0  
 SWH 4139.073 Hz  
 FIDRES 0.252629 Hz  
 AQ 1.9792372 sec  
 RG 80.6  
 DM 120.600 usec  
 DE 7.00 usec  
 TE 295.7 K  
 D1 1.00000000 sec  
 MCREST 0.00000000 sec  
 MCMRK 0.01500000 sec

===== CHANNEL f1 =====  
 NUC1 13C  
 P1 9.70 usec  
 PL1 -1.00 dB  
 SFO1 200.1617014 MHz

F2 - Processing parameters  
 SI 8192  
 SF 200.1600047 MHz  
 WMW EM  
 SSB 0  
 LB 0.30 Hz  
 GB 0  
 PC 1.00

ID NMR plot parameters  
 CX 22.50 cm  
 CY 13.50 cm  
 FIP 8.549 ppm  
 F1 1711.11 Hz  
 F2 -43.36 Hz  
 PPMCM 0.38957 ppm/cm  
 HZCM 77.97657 Hz/cm

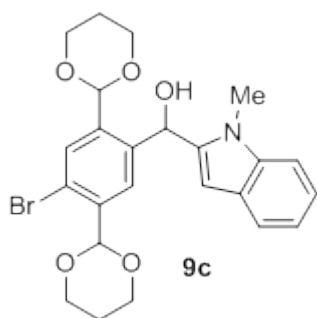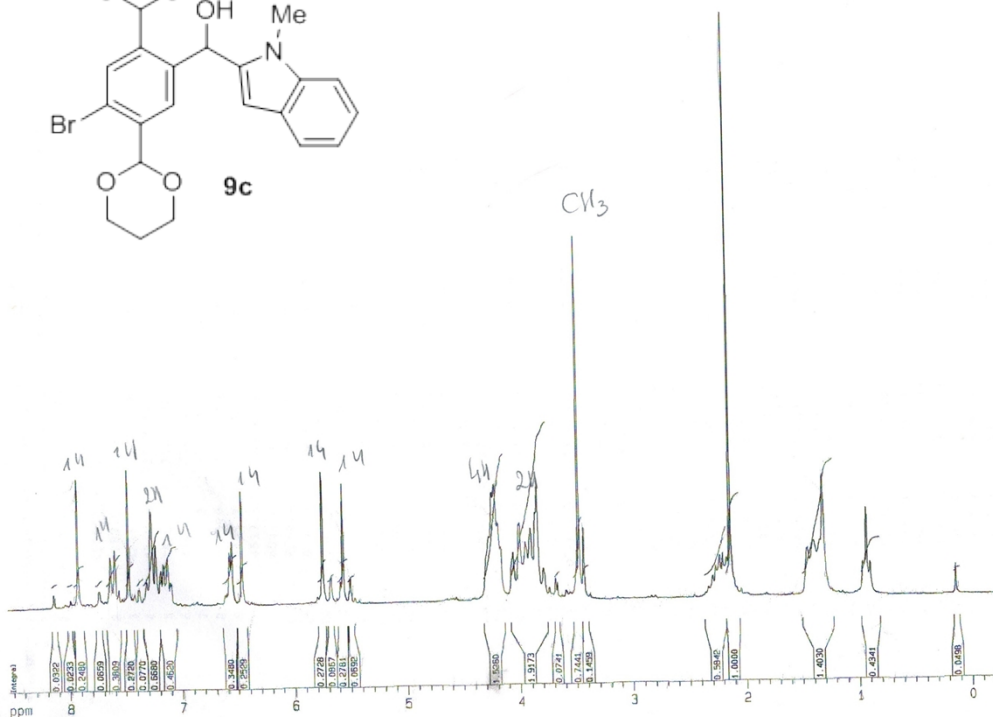

skai2309 2 1 C:\NMR\_Data\Service\CBMM

j. skali =p-indoh= A-13C.stan CDCl3

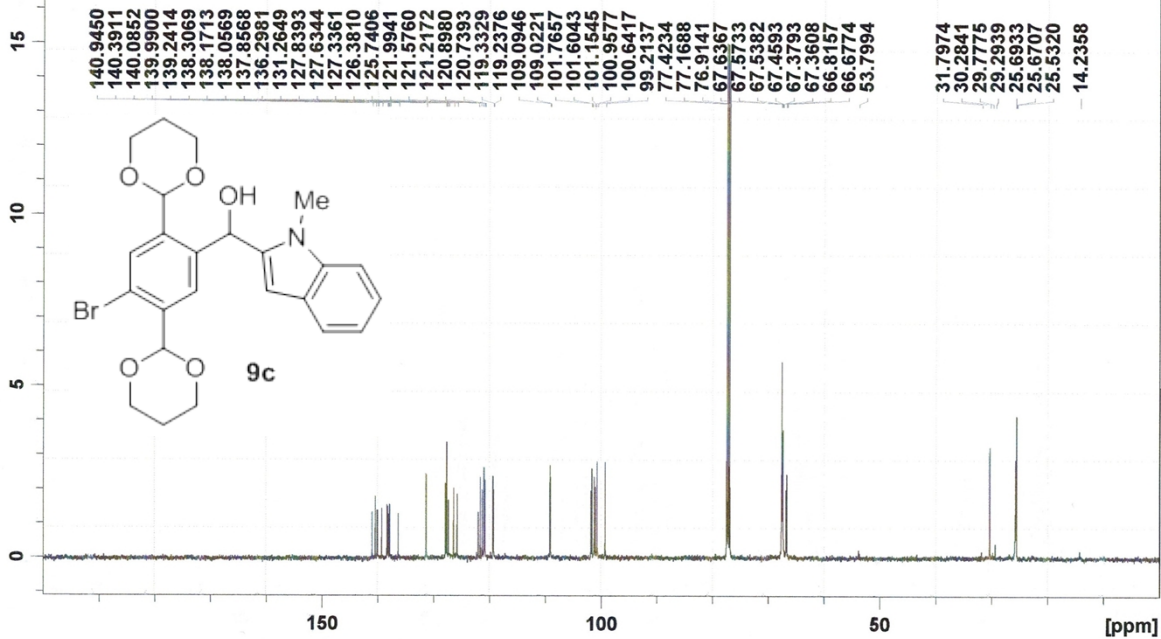

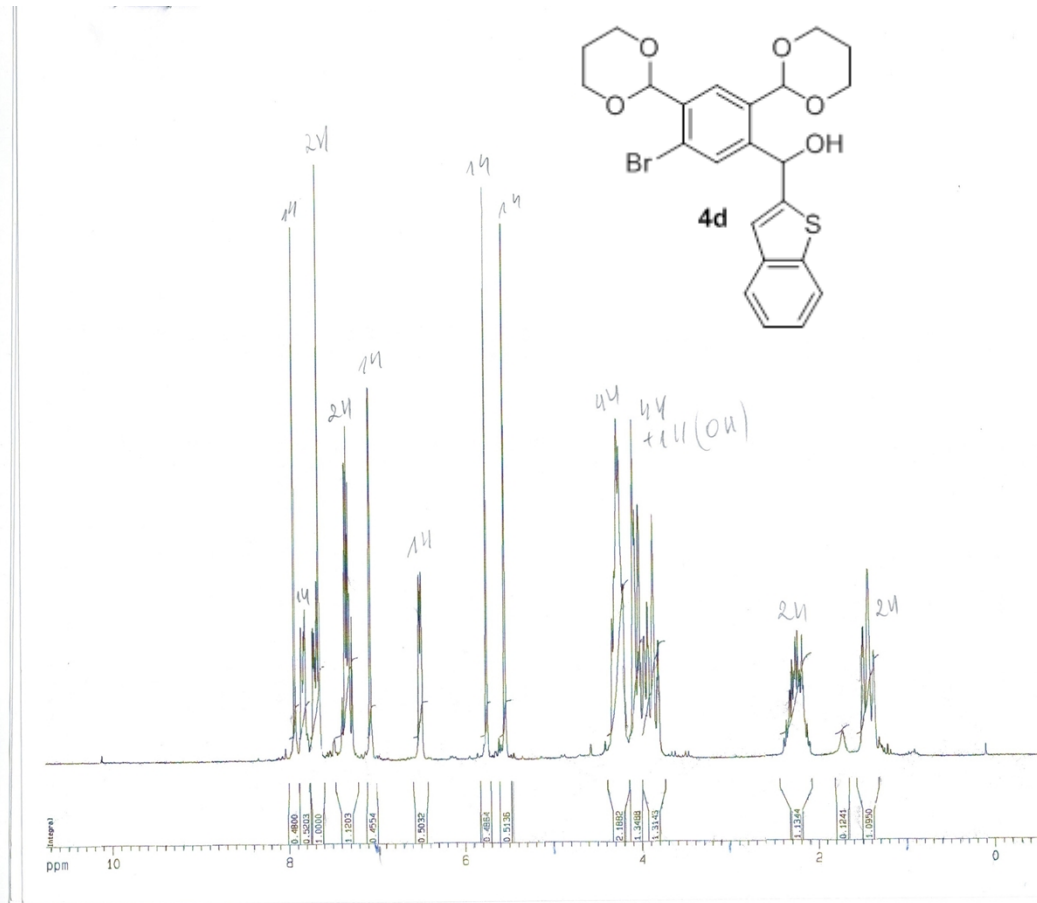

CBM1N PAN L002  
 \*\*\* NMR LAB \*\*\*  
 \*\* AVANCE AV 200 \*\*  
 Tel: 0426803 226

Current Data Parameters  
 NAME skat1204  
 EXPNO 3  
 PROCNO 1  
 DU C:/u  
 USER service

F2 - Acquisition Parameters  
 Date\_ 20100412  
 Time 17.12  
 INSTRUM AV\_200  
 PROBHD 5 mm QNP 1H/1  
 PULPROG zg30  
 TD 16384  
 SOLVENT CDCl3  
 NS 16  
 DS 0  
 SWH 4139.073 Hz  
 FIDRES 0.252629 Hz  
 AQ 1.9792372 sec  
 RG 362  
 DW 120.800 usec  
 DE 7.00 usec  
 TE 296.0 K  
 D1 1.0000000 sec  
 MCREST 0.0000000 sec  
 MCWRR 0.0150000 sec

===== CHANNEL f1 =====  
 NUC1 1H  
 P1 9.70 usec  
 PL1 -1.00 dB  
 SFO1 200.1617014 MHz

F2 - Processing parameters  
 SI 8192  
 SF 200.1600000 MHz  
 NDM EM  
 SSB 0  
 LB 0.30 Hz  
 GB 0  
 PC 1.00

1D NMR plot parameters  
 CX 22.50 cm  
 CY 13.50 cm  
 F1P 10.760 ppm  
 F1 2153.67 Hz  
 F2P -0.516 ppm  
 F2 -103.62 Hz  
 PPHCM 0.50122 ppm/cm  
 HZCM 100.32391 Hz/cm

j.skalik 62 JS k 13C stan

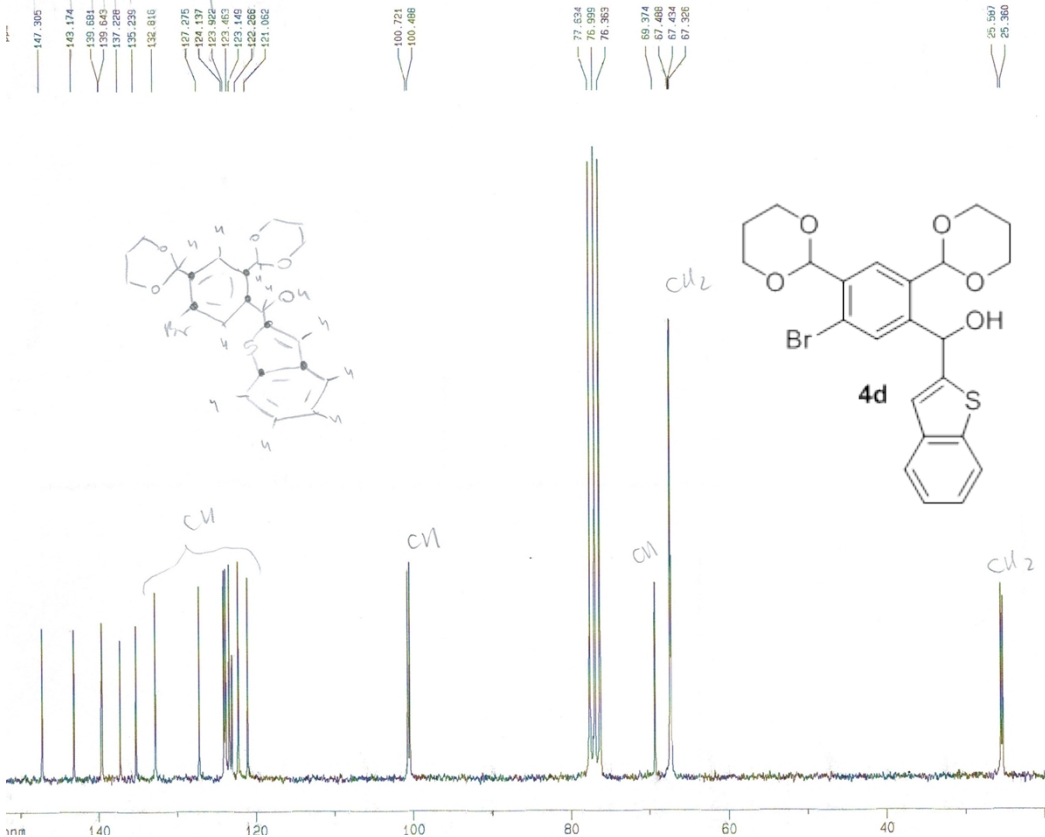

CBM1N PAN L002  
 \*\*\* NMR LAB \*\*\*  
 \*\* AVANCE AV 200 \*\*  
 Tel: 0426803 226

Current Data Parameters  
 NAME skat1304  
 EXPNO 4  
 PROCNO 1  
 DU C:/u  
 USER service

F2 - Acquisition Parameters  
 Date\_ 20100414  
 Time 1.12  
 INSTRUM AV\_200  
 PROBHD 5 mm QNP 1H/1  
 PULPROG zgpg30  
 TD 32768  
 SOLVENT CDCl3  
 NS 8725  
 DS 2  
 SWH 12345.679 Hz  
 FIDRES 0.376760 Hz  
 AQ 1.3271540 sec  
 RG 8192  
 DW 40.500 usec  
 DE 7.00 usec  
 TE 297.1 K  
 D1 2.0000000 sec  
 d11 0.0300000 sec  
 DELTA 1.8999999 sec  
 MCREST 0.0000000 sec  
 MCWRR 0.0150000 sec

===== CHANNEL f1 =====  
 NUC1 13C  
 P1 4.75 usec  
 PL1 1.00 dB  
 SFO1 50.3358693 MHz

===== CHANNEL f2 =====  
 CPDPRG2 waltz16  
 NUC2 1H  
 PCPD2 100.00 usec  
 PL2 -1.00 dB  
 PL12 22.10 dB  
 PL13 26.00 dB  
 SFO2 200.1610008 MHz

F2 - Processing parameters  
 SI 32768  
 SF 50.3302767 MHz  
 NDM EM  
 SSB 0  
 LB 2.00 Hz  
 GB 0  
 PC 1.40

1D NMR plot parameters  
 CX 22.50 cm  
 CY 13.50 cm  
 F1P 152.931 ppm  
 F1 7669.89 Hz  
 F2P 19.376 ppm  
 F2 975.22 Hz  
 PPHCM 5.91177 ppm/cm  
 HZCM 287.54077 Hz/cm

This report was created by ACD/NMR Processor Academic Edition. For more information go to [www.acdlabs.com/nmrproc/](http://www.acdlabs.com/nmrproc/)  
**p-BTFOH**

9/24/2013 12:54:41 PM  
p-BTFOH

|                        |                                      |                       |         |                        |                      |                      |                      |
|------------------------|--------------------------------------|-----------------------|---------|------------------------|----------------------|----------------------|----------------------|
| Acquisition Time (sec) | 1.9792                               | Comment               | p-BTFOH | Date                   | 24 Sep 2013 12:44:16 | Date Stamp           | 24 Sep 2013 12:44:16 |
| File Name              | C:\Users\User\Desktop\ska22409\11fid | Frequency (MHz)       | 200.16  | Nucleus                | 1H                   | Number of Transients | 64                   |
| Origin                 | spect                                | Original Points Count | 8192    | Owner                  | root                 | Points Count         | 8192                 |
| Receiver Gain          | 2298.80                              | SW(cyclical) (Hz)     | 4139.07 | Solvent                | CHLOROFORM-d         | Pulse Sequence       | zg30                 |
| Spectrum Type          | STANDARD                             | Sweep Width (Hz)      | 4138.57 | Temperature (degree C) | 19.200               | Spectrum Offset (Hz) | 1696.7002            |

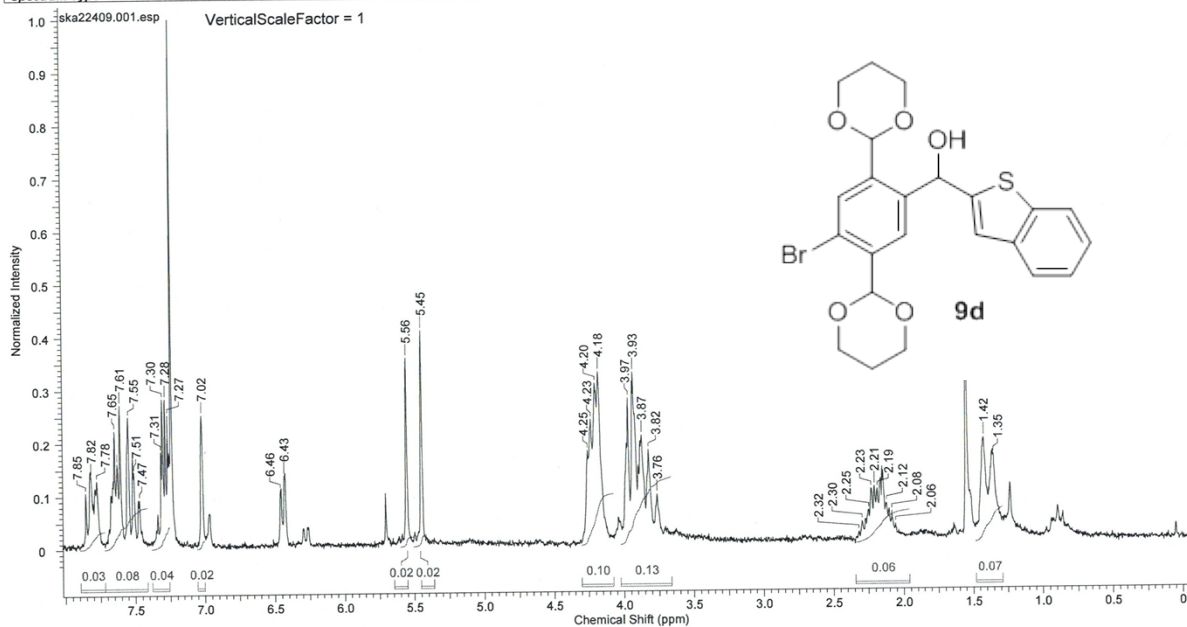

This report was created by ACD/NMR Processor Academic Edition. For more information go to [www.acdlabs.com/nmrproc/](http://www.acdlabs.com/nmrproc/)  
**1**

9/20/2013 11:16:56 AM  
j. skalik =p-btfoh= 13C(1H)

|                        |                      |                      |                                     |                        |                      |
|------------------------|----------------------|----------------------|-------------------------------------|------------------------|----------------------|
| Acquisition Time (sec) | 0.9088               | Comment              | j. skalik =p-btfoh= 13C(1H)         | Date                   | 19 Sep 2013 10:44:48 |
| Date Stamp             | 19 Sep 2013 10:44:48 | File Name            | C:\Users\User\Desktop\ska11909\2fid | Frequency (MHz)        | 125.76               |
| Nucleus                | 13C                  | Number of Transients | 128                                 | Origin                 | AV_III_500           |
| Points Count           | 32768                | Pulse Sequence       | zgpg30                              | Receiver Gain          | 2050.00              |
| Spectrum Offset (Hz)   | 15052.7930           | Spectrum Type        | STANDARD                            | SW(cyclical) (Hz)      | 36057.69             |
|                        |                      | Sweep Width (Hz)     | 36056.59                            | Temperature (degree C) | 21.979               |

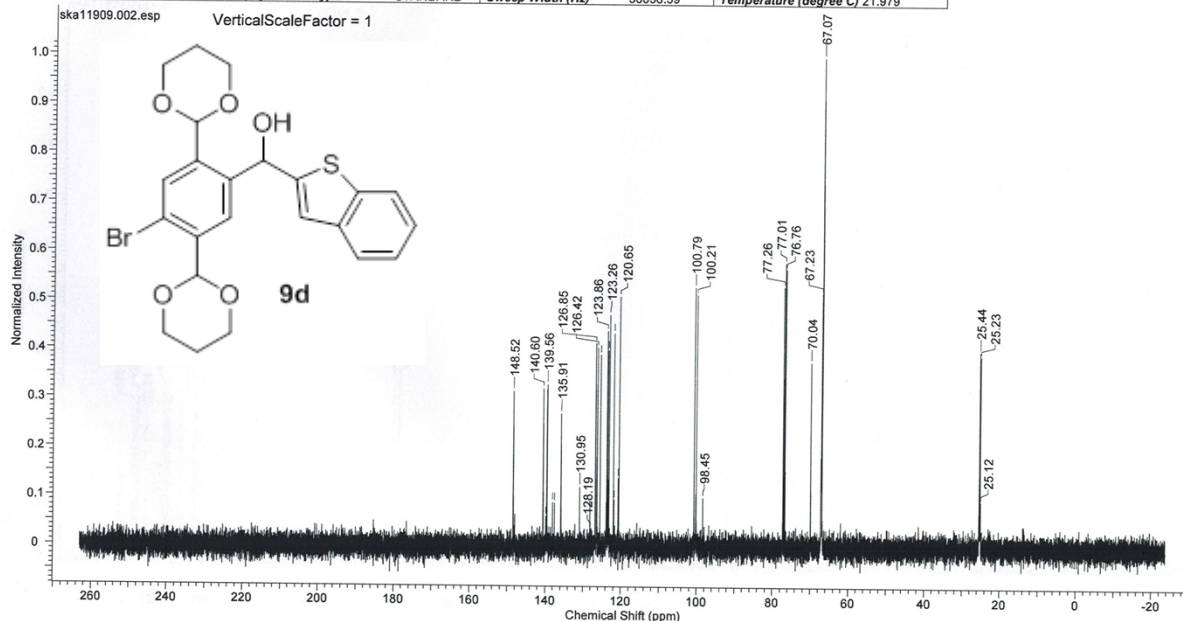



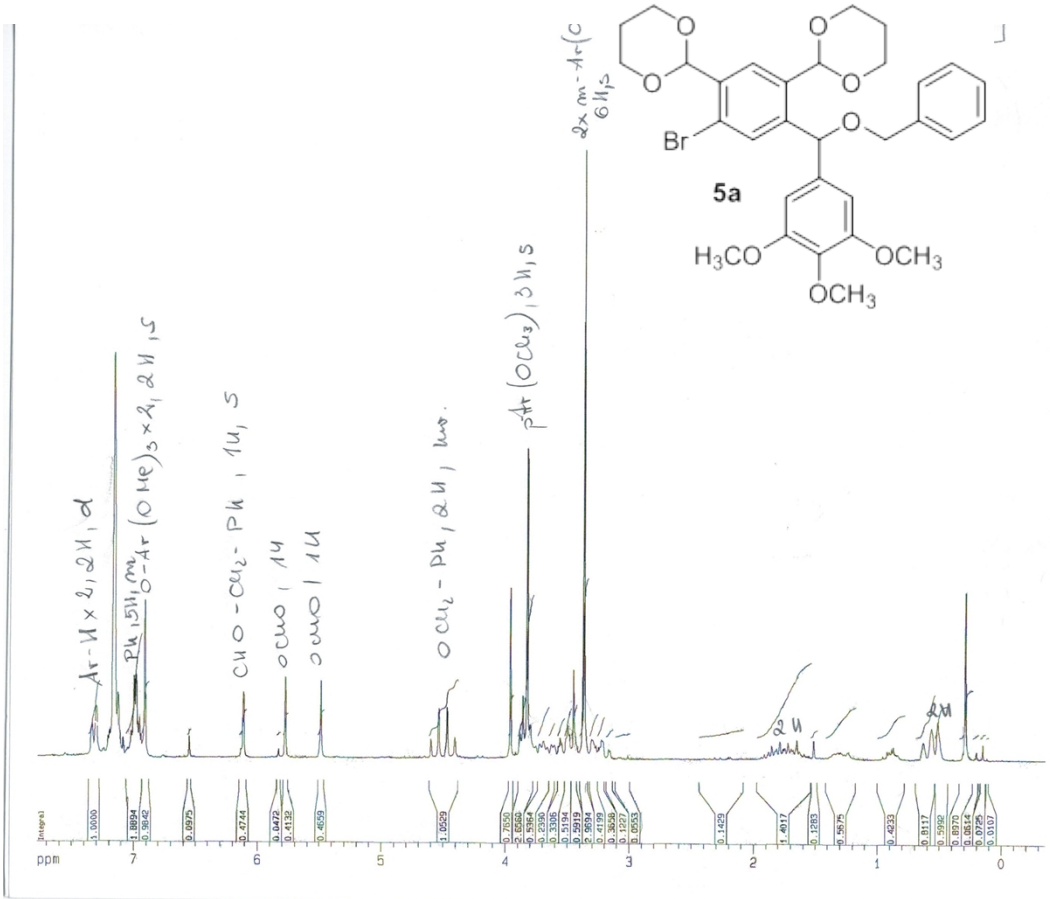

\*\*\* NMR LAB \*\*\*  
 \*\* AVANCE AV 200 \*\*  
 Tel: 0426803 226

Current Data Parameters  
 NAME skat10406  
 EXPNO 4  
 PROCNO 1  
 DU C/u  
 USER service

F2 - Acquisition Parameters  
 Date\_ 20090604  
 Time 18.20  
 INSTRUM AV\_200  
 PROBD 5 mm QNP 1H/1  
 PULPROG zgpg30  
 TD 16384  
 SOLVENT CDCl3  
 NS 34  
 DS 0  
 SWH 4139.073 Hz  
 FIDRES 0.252629 Hz  
 AQ 1.9792372 sec  
 RG 645.1  
 DM 120.800 usec  
 DE 7.00 usec  
 TE 298.2 K  
 D1 1.00000000 sec  
 MCREST 0.00000000 sec  
 MCNRK 0.01500000 sec

\*\*\*\*\* CHANNEL f1 \*\*\*\*\*  
 NUC1 1H  
 P1 9.70 usec  
 PL1 -1.00 dB  
 SFO1 200.1617014 MHz

F2 - Processing parameters  
 SI 8192  
 SF 200.1599339 MHz  
 MDW EM  
 SSB 0  
 LB 0.30 Hz  
 GB 0  
 PC 1.00

1D NMR plot parameters  
 CX 22.50 cm  
 CY 13.50 cm  
 F1P 7.775 ppm  
 F1 1556.24 Hz  
 F2P -0.352 ppm  
 F2 -70.38 Hz  
 PPMCM 0.36116 ppm/cm  
 HZCM 72.29410 Hz/cm

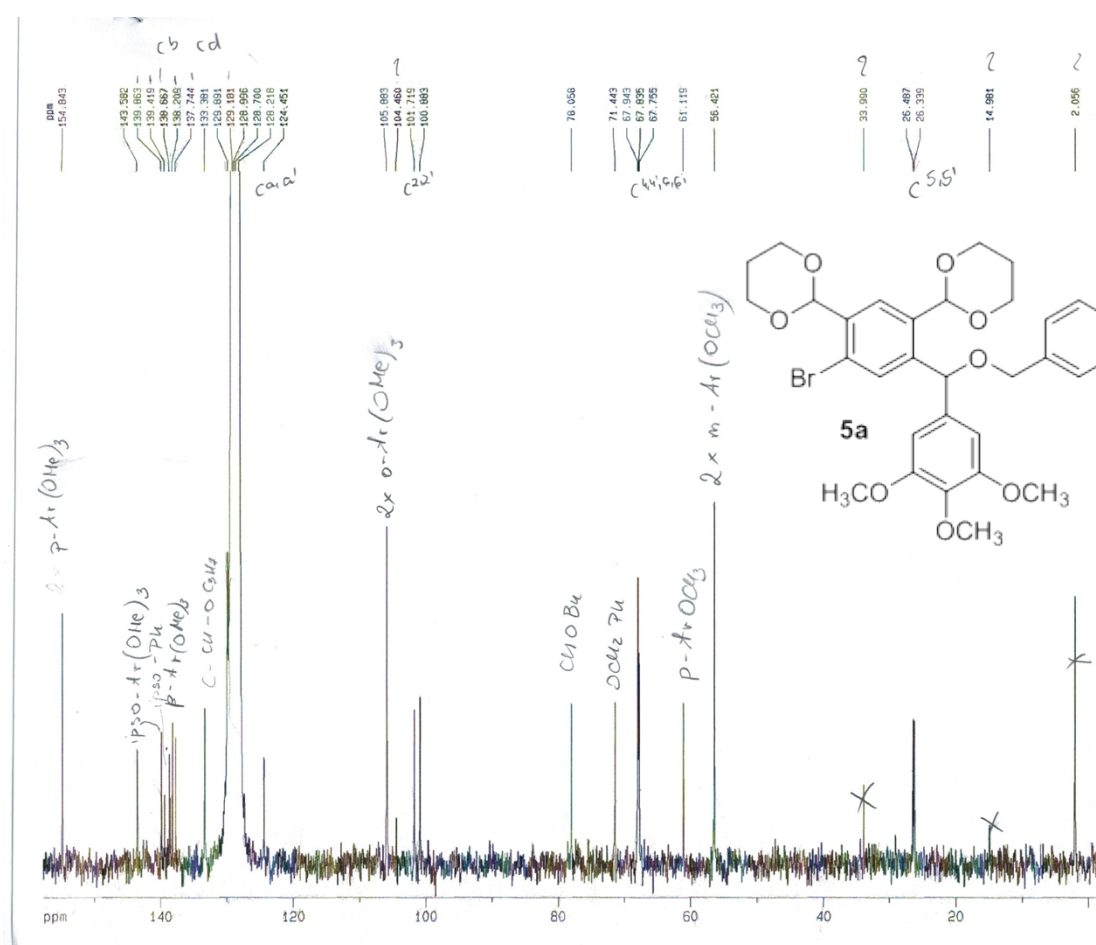

\*\*\* NMR LAB \*\*\*  
 \*\* AVANCE AV 200 \*\*  
 Tel: 0426803 226

Current Data Parameters  
 NAME skat1706  
 EXPNO 1  
 PROCNO 1  
 DU C/u  
 USER service

F2 - Acquisition Parameters  
 Date\_ 20090617  
 Time 21.14  
 INSTRUM AV\_200  
 PROBD 5 mm QNP 1H/1  
 PULPROG zgpg30  
 TD 32768  
 SOLVENT CDCl3  
 NS 12417  
 DS 2  
 SWH 12345.679 Hz  
 FIDRES 0.376750 Hz  
 AQ 1.3271540 sec  
 RG 4597.6  
 DM 40.500 usec  
 DE 7.00 usec  
 TE 298.2 K  
 D1 2.00000000 sec  
 d11 0.03000000 sec  
 DELTA 1.89999999 sec  
 MCREST 0.00000000 sec  
 MCNRK 0.01500000 sec

\*\*\*\*\* CHANNEL f1 \*\*\*\*\*  
 NUC1 13C  
 P1 4.75 usec  
 PL1 1.00 dB  
 SFO1 50.3368083 MHz

\*\*\*\*\* CHANNEL f2 \*\*\*\*\*  
 CPDPRG2 waltz16  
 NUC2 1H  
 PCH2 100.00 usec  
 PL2 -1.00 dB  
 PL12 22.10 dB  
 PL13 26.00 dB  
 SFO2 200.1610008 MHz

F2 - Processing parameters  
 SI 32768  
 SF 50.3302200 MHz  
 MDW EM  
 SSB 0  
 LB 2.00 Hz  
 GB 0  
 PC 1.40

1D NMR plot parameters  
 CX 22.50 cm  
 CY 454.34 cm  
 F1P 157.733 ppm  
 F1 7938.73 Hz  
 F2P -1.536 ppm  
 F2 -77.31 Hz  
 PPMCM 7.07951 ppm/cm  
 HZCM 396.26810 Hz/cm

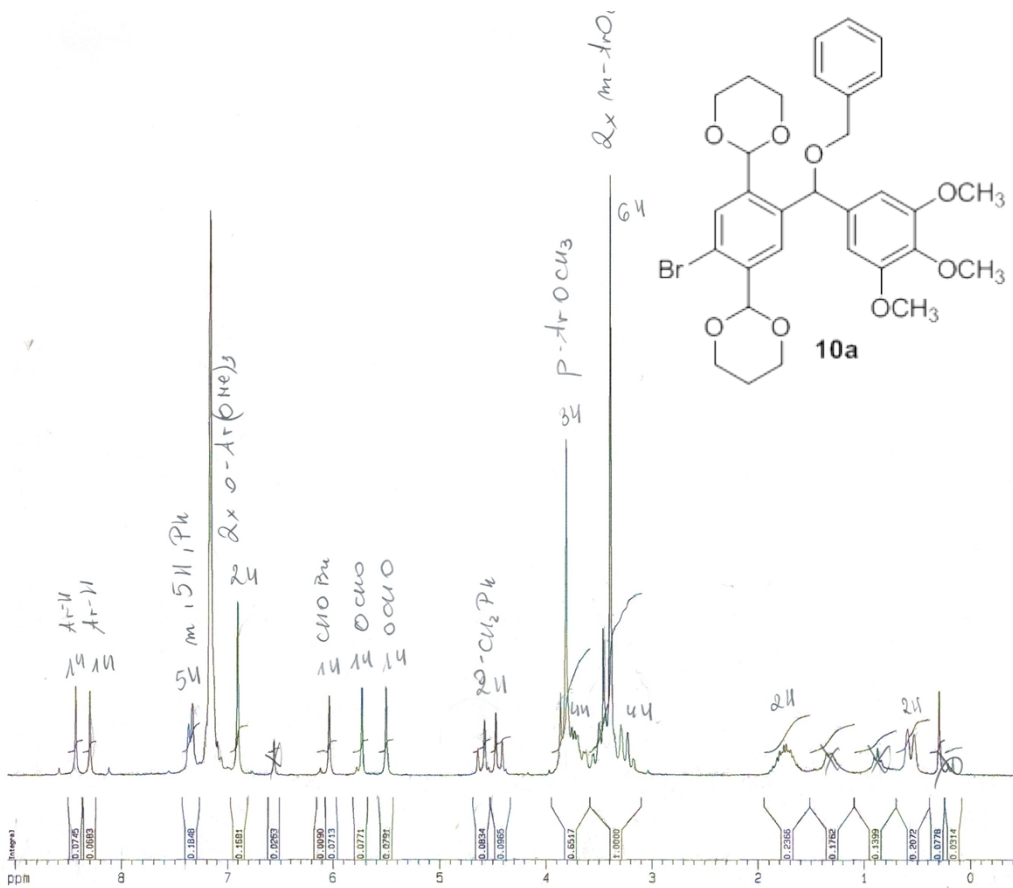

CBM1M PAN LOOZ  
 \*\*\* NMR LAB \*\*\*  
 \*\* AVANCE AV 200 \*\*  
 Tel: 0426803 226

Current Data Parameters  
 NAME skai2506  
 EXPNO 1  
 PROCNO 1  
 DU C /u  
 USER service

F2 - Acquisition Parameters  
 Date\_ 20090525  
 Time 20.46  
 INSTRUM AV\_200  
 PROBHD 5 mm QNP 1H/1  
 PULPROG zg30  
 TO 16364  
 SOLVENT C6D6  
 NS 24  
 DS 0  
 SWH 4139.073 Hz  
 FIDRES 0.252629 Hz  
 AQ 1.972372 sec  
 RG 574.7  
 DW 120.800 usec  
 DE 7.00 usec  
 TE 298.0 K  
 D1 1.00000000 sec  
 MCREST 0.00000000 sec  
 MCWFK 0.01500000 sec

\*\*\*\*\* CHANNEL f1 \*\*\*\*\*  
 NUC1 1H  
 P1 9.70 usec  
 PL1 -1.00 dB  
 SFO1 200.1517014 MHz

F2 - Processing parameters  
 SI 8192  
 SF 200.1599268 MHz  
 MDW EM  
 SSB 0  
 LB 0.30 Hz  
 GB 0  
 PC 1.00

1D NMR plot parameters  
 CX 22.50 cm  
 CY 13.50 cm  
 F1P 9.074 ppm  
 F1 1816.34 Hz  
 F2P -0.457 ppm  
 F2 -91.45 Hz  
 PPMCM 0.42261 ppm/cm  
 HZCM 84.79063 Hz/cm

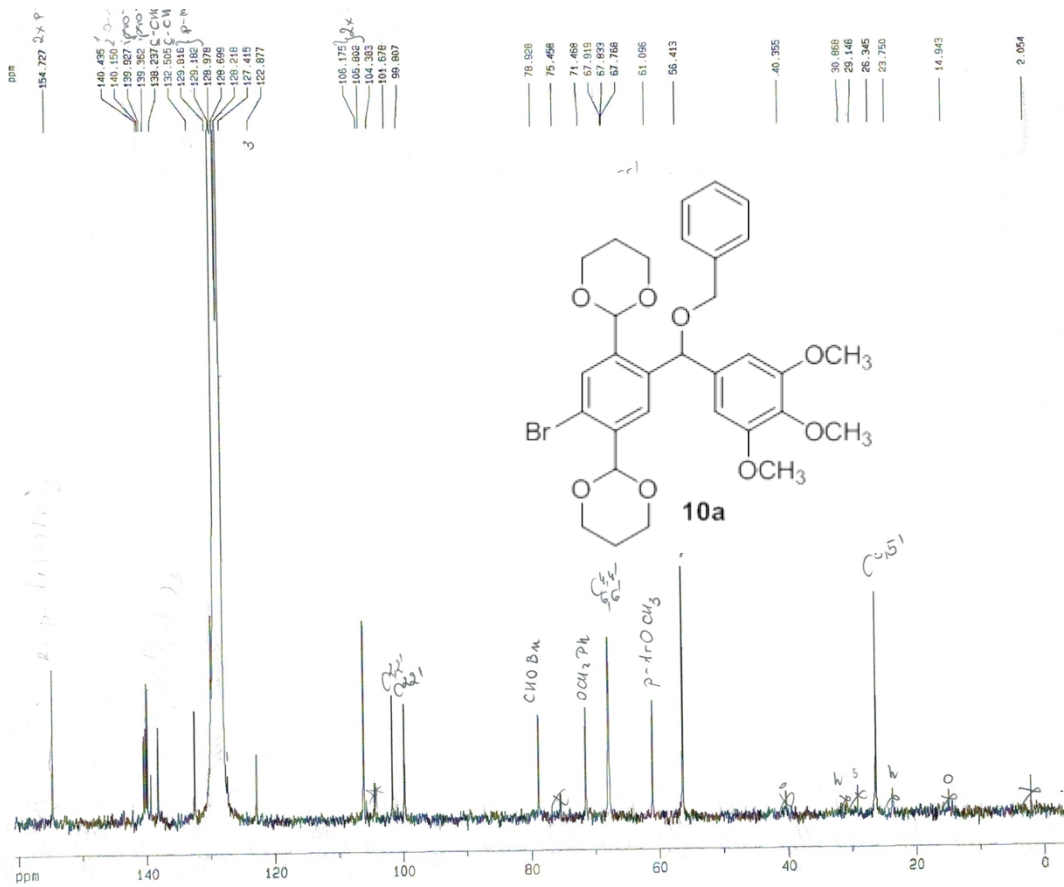

\*\* AVANCE AV 200 \*\*  
 Tel: 0426803 226

Current Data Parameters  
 NAME skai2506  
 EXPNO 2  
 PROCNO 1  
 DU C /u  
 USER service

F2 - Acquisition Parameters  
 Date\_ 20090525  
 Time 21.18  
 INSTRUM AV\_200  
 PROBHD 5 mm QNP 1H/1  
 PULPROG zgpg30  
 TO 32768  
 SOLVENT C6D6  
 NS 13301  
 DS 2  
 SWH 12345.678 Hz  
 FIDRES 0.376760 Hz  
 AQ 1.3271540 sec  
 RG 2580.3  
 DW 40.500 usec  
 DE 7.00 usec  
 TE 298.2 K  
 D1 2.00000000 sec  
 d11 0.03000000 sec  
 DELTA 1.99999999 sec  
 MCREST 0.00000000 sec  
 MCWFK 0.01500000 sec

\*\*\*\*\* CHANNEL f1 \*\*\*\*\*  
 NUC1 13C  
 P1 4.75 usec  
 PL1 1.00 dB  
 SFO1 50.3368083 MHz

\*\*\*\*\* CHANNEL f2 \*\*\*\*\*  
 CPDPRG2 waltz16  
 NUC2 1H  
 P2P2 100.00 usec  
 PL2 -1.00 dB  
 PL12 22.10 dB  
 PL13 26.00 dB  
 SFO2 200.1610008 MHz

F2 - Processing parameters  
 SI 32768  
 SF 50.3368083 MHz  
 MDW EM  
 SSB 0  
 LB 2.00 Hz  
 GB 0  
 PC 1.40

1D NMR plot parameters  
 CX 22.50 cm  
 CY 165.55 cm  
 F1P 160.676 ppm  
 F1 8066.79 Hz  
 F2P -3.756 ppm  
 F2 -189.02 Hz  
 PPMCM 7.30601 ppm/cm  
 HZCM 367.61376 Hz/cm

This report was created by ACD/NMR Processor Academic Edition. For more information go to [www.acdlabs.com/nmrproc/](http://www.acdlabs.com/nmrproc/)  
**m-TMBOBnVinyl**

12/14/2011 9:58:48 AM  
 m-TMBOBnVinyl

| Acquisition Time (sec)    | 1.9792                                       | Comment               | Skalik Joanna Vinyl2 | Date                   | 01 Dec 2011 13:09:36 |
|---------------------------|----------------------------------------------|-----------------------|----------------------|------------------------|----------------------|
| File Name                 | C:\Users\Asia\Desktop\Wydruk\m-TMBOVinyl\fid | Original Points Count | 8192                 | Owner                  | root                 |
| File Origin               | spect                                        | SW(cyclical) (Hz)     | 4139.07              | Solvent                | CHLOROFORM-d         |
| File Receiver Gain        | 22.60                                        | Spectrum Type         | STANDARD             | Temperature (degree C) | 19.500               |
| File Sweep Width (Hz)     | 4138.57                                      |                       |                      |                        |                      |
| File Spectrum Offset (Hz) | 1696.7002                                    |                       |                      |                        |                      |

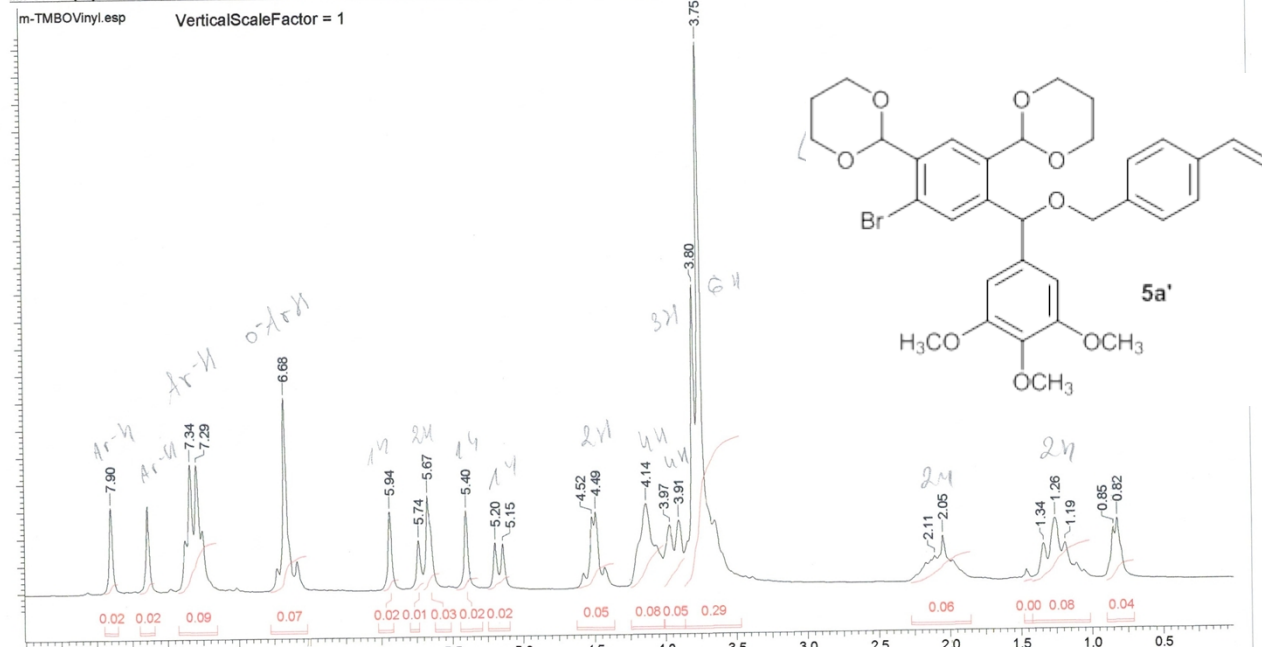

This report was created by ACD/NMR Processor Academic Edition. For more information go to [www.acdlabs.com/nmrproc/](http://www.acdlabs.com/nmrproc/)  
**m-TMBOBnVinylC13**

12/14/2011 10:28:05 AM  
 m-TMBOBnVinylC13

| Acquisition Time (sec) | 1.3271               | Comment          | J. Skalik mTMBOBnVinyl                        | Date                   | 09 Dec 2011 14:41:20 |
|------------------------|----------------------|------------------|-----------------------------------------------|------------------------|----------------------|
| Date Stamp             | 09 Dec 2011 14:41:20 | File Name        | C:\Users\Asia\Desktop\Wydruk\skala1091212\fid | Frequency (MHz)        | 50.33                |
| Nucleus                | 13C                  | Origin           | spect                                         | Original Points Count  | 16384                |
| Points Count           | 16384                | Receiver Gain    | 1290.20                                       | SW(cyclical) (Hz)      | 12345.68             |
| Spectrum Offset (Hz)   | 5471.0591            | Spectrum Type    | STANDARD                                      | Temperature (degree C) | 19.700               |
|                        |                      | Sweep Width (Hz) | 12344.92                                      |                        |                      |

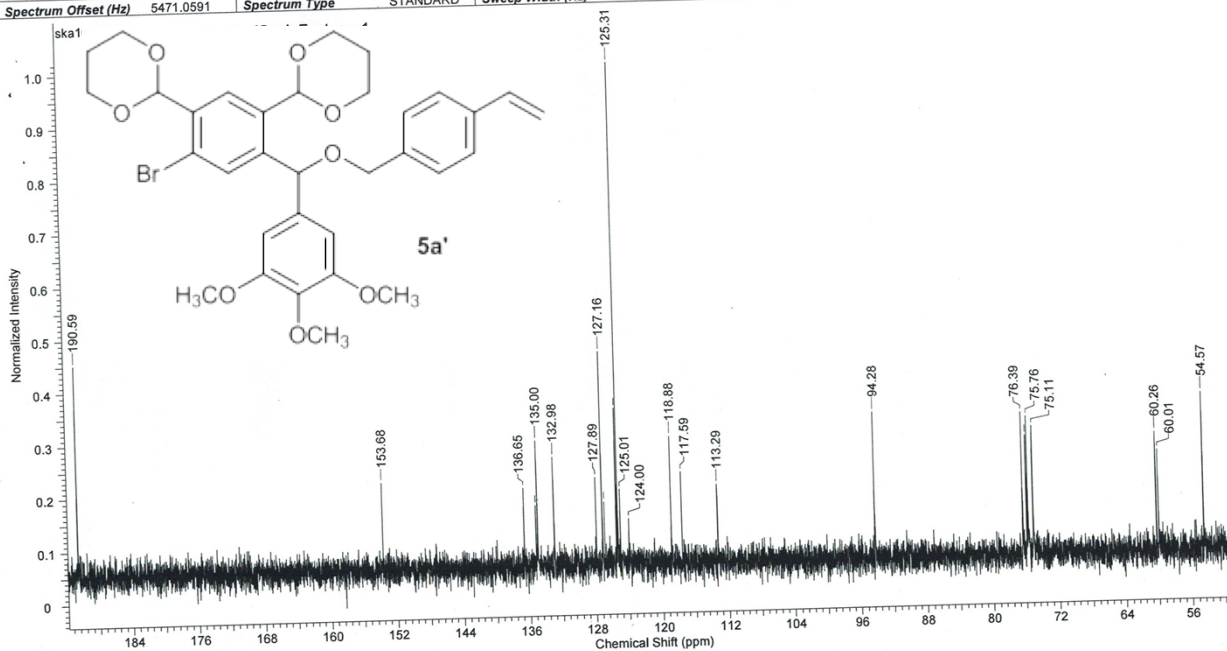

**194.JS**

7/18/2012 1:51:38 PM

|                        |                                       |                       |                  |         |                        |                      |                      |                |      |
|------------------------|---------------------------------------|-----------------------|------------------|---------|------------------------|----------------------|----------------------|----------------|------|
| Acquisition Time (sec) | 1.9792                                | Comment               | J. Skalik 2      | Date    | 17 Jul 2012 15:37:04   | Date Stamp           | 17 Jul 2012 15:37:04 |                |      |
| File Name              | C:\Users\User\Desktop\194js\194js.fid |                       | Frequency (MHz)  | 200.16  | Nucleus                | 1H                   | Number of Transients | 16             |      |
| Origin                 | spect                                 | Original Points Count | 8192             | Owner   | root                   | Points Count         | 8192                 | Pulse Sequence | zg30 |
| Receiver Gain          | 812.70                                | SW(cyclical) (Hz)     | 4139.07          | Solvent | CHLOROFORM-d           | Spectrum Offset (Hz) | 1696.7002            |                |      |
| Spectrum Type          | STANDARD                              |                       | Sweep Width (Hz) | 4138.57 | Temperature (degree C) |                      |                      |                |      |

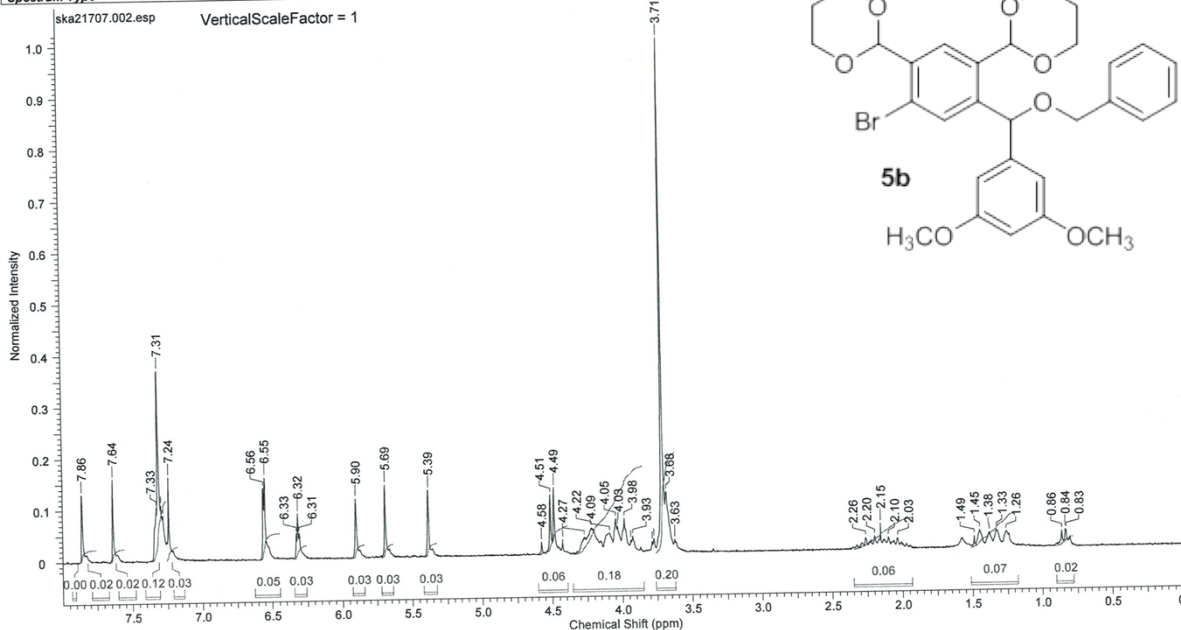

**j. skalik 194js 13C{1H}**

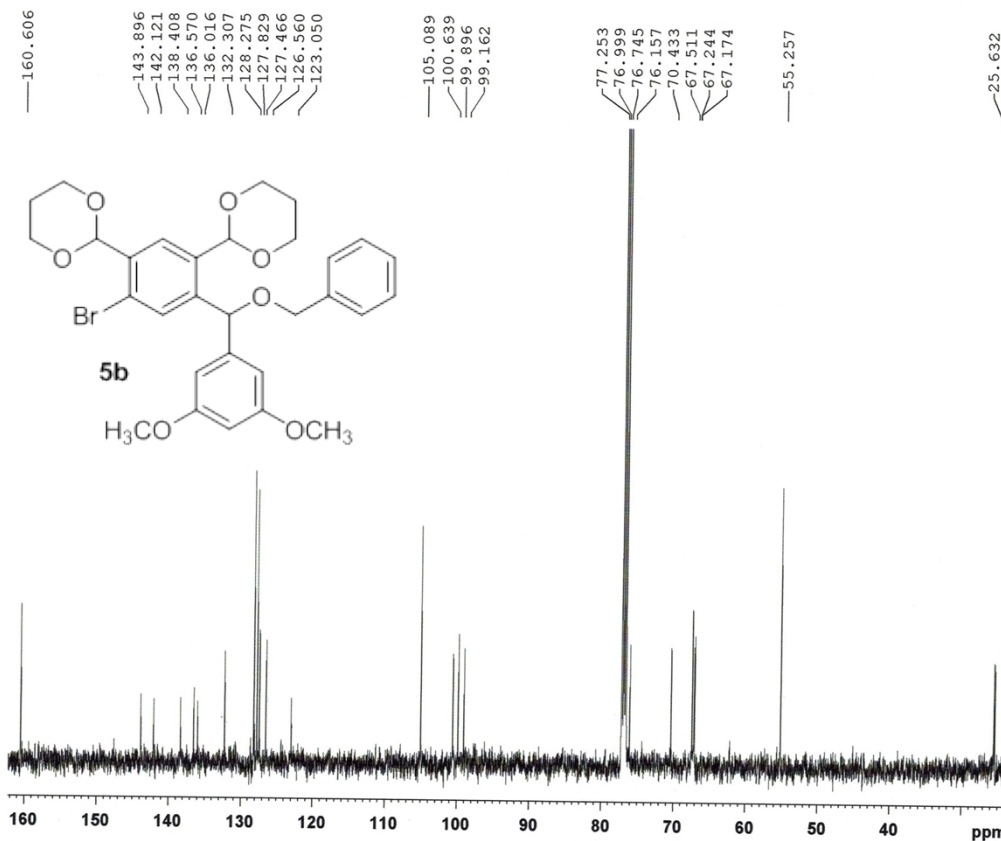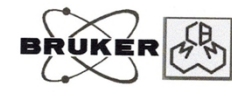

```

**CBM1M PAN LODZ**
**** NMR LAB ****
**AV III 500 MHz**
Tel:042 6803 307

Current Data Parameters
DATPATH C:\NMR_Data\Service\CBMM_2012
NAME Skali1307
EXPNO 2
PROCNO 1

F2 - Acquisition Parameters
Date_ 20120719
Time 11.32
INSTRUM AV III 500
PROBHD 5 mm Multinucl
PULPROG zgpg30
TD 65336
SOLVENT CDCl3
NS 512
DS 4
SWH 36057.691 Hz
FIDRES 0.550197 Hz
AQ 0.9088159 sec
RG 2050
DM 13.867 usec
DE 6.50 usec
TE 295.0 K
D1 2.0000000 sec
D11 0.0300000 sec
TDO 1

===== CHANNEL f1 =====
NUC1 13C
P1 11.00 usec
PLW1 160.0000000 W
SFO1 125.7728788 MHz

===== CHANNEL f2 =====
CPDPRG2 waltz16
NUC2 1H
PCPD2 100.00 usec
PLM2 10.0000000 W
PLW2 0.08556300 W
PLM13 0.08556300 W
SFO2 500.1324905 MHz

F2 - Processing parameters
SI 32768
SF 125.7577975 MHz
WDW EM
SSB 0
LB 2.00 Hz
GB 0
PC 1.40
SR 8.55 Hz
    
```



This report was created by ACD/NMR Processor Academic Edition. For more information go to [www.acdlabs.com/nmrproc/](http://www.acdlabs.com/nmrproc/)

### benzylowy alkohol p-dimetoksy

3/1/2013 9:29:12 AM

2

JS para dimetoksy benzylowy alkohol

| Acquisition Time (sec) | Comment                             | File Name                            | Date                          | Frequency (MHz)      |
|------------------------|-------------------------------------|--------------------------------------|-------------------------------|----------------------|
| 1.9792                 | JS para dimetoksy benzylowy alkohol | C:\Users\User\Desktop\ska10103\3\fid | 01 Mar 2013 09:02:08          | 200.16               |
| 01 Mar 2013 09:02:08   |                                     |                                      |                               |                      |
| 1H                     | Number of Transients 64             | Origin spect                         | Original Points Count 8192    | Owner root           |
| 8192                   | Pulse Sequence zg30                 | Receiver Gain 322.50                 | SW(cyclical) (Hz) 4139.07     | Solvent CHLOROFORM-d |
| 1696.7002              | Spectrum Type STANDARD              | Sweep Width (Hz) 4139.57             | Temperature (degree C) 18.500 |                      |

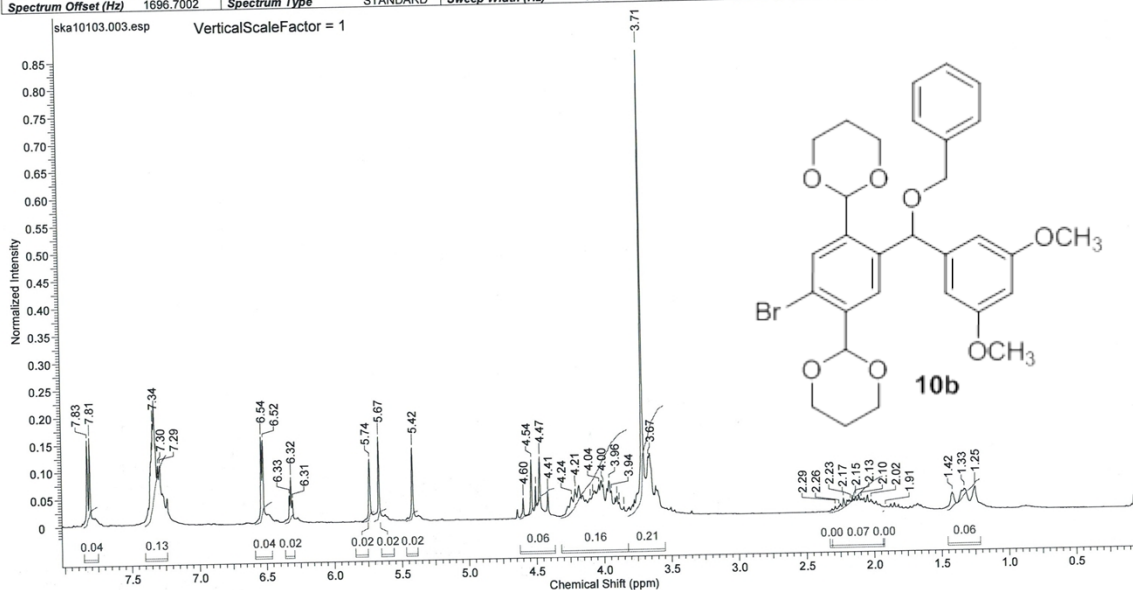

This report was created by ACD/NMR Processor Academic Edition. For more information go to [www.acdlabs.com/nmrproc/](http://www.acdlabs.com/nmrproc/)

### benzylowy alkohol p-dimetoksy

2/28/2013 4:06:44 PM

2

benzylowy p-dimetoksy

| Acquisition Time (sec) | Comment                   | File Name                   | Date                          | Frequency (MHz)      |
|------------------------|---------------------------|-----------------------------|-------------------------------|----------------------|
| 1.3271                 | benzylowy p-dimetoksy     | C:\Users\User\Desktop\2\fid | 28 Feb 2013 15:58:08          | 50.33                |
| 28 Feb 2013 15:58:08   |                           |                             |                               |                      |
| 13C                    | Number of Transients 1024 | Origin spect                | Original Points Count 16384   | Owner root           |
| 16384                  | Pulse Sequence zgpg30     | Receiver Gain 7298.20       | SW(cyclical) (Hz) 12345.68    | Solvent CHLOROFORM-d |
| 5471.0591              | Spectrum Type STANDARD    | Sweep Width (Hz) 12344.92   | Temperature (degree C) 19.500 |                      |

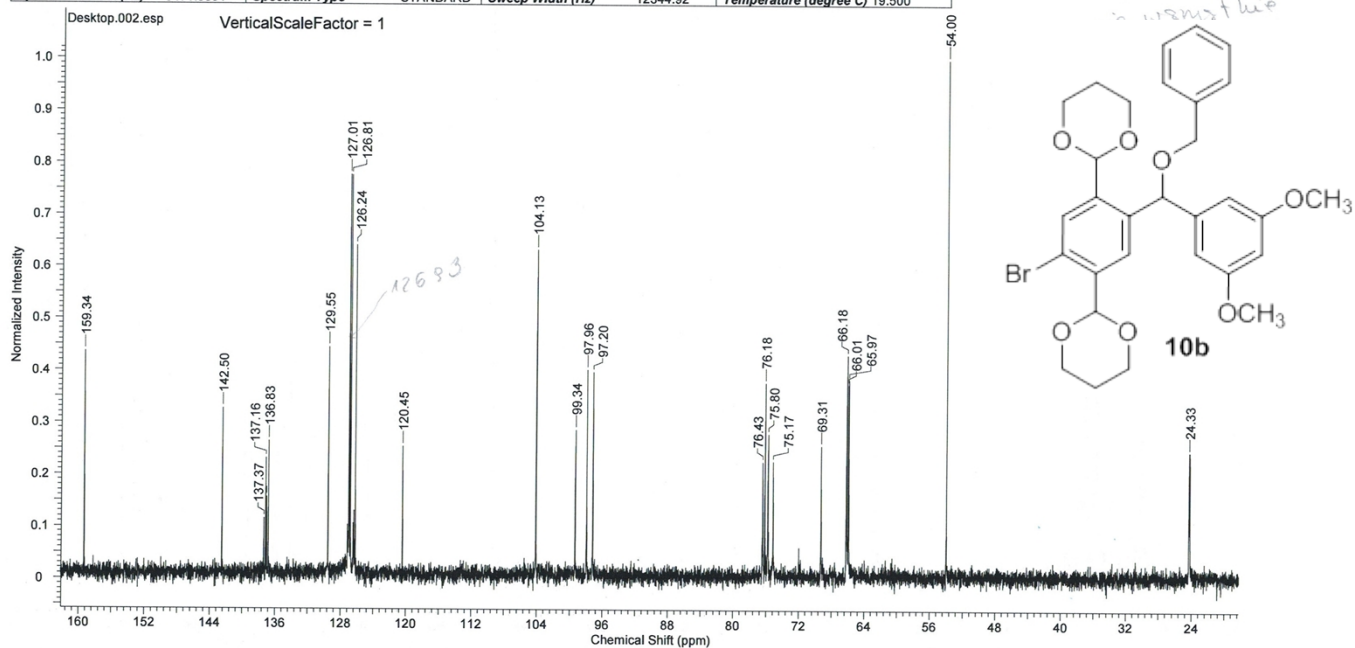

This report was created by ACD/NMR Processor Academic Edition. For more information go to [www.acdlabs.com/nmrproc/](http://www.acdlabs.com/nmrproc/)

### benzylowany monoalkohol meta indole

12/7/2011 9:59:28 AM

|                        |                      |                  |                             |                        |                      |
|------------------------|----------------------|------------------|-----------------------------|------------------------|----------------------|
| Acquisition Time (sec) | 1.9792               | Comment          | Skalik J. IndBn2            | Date                   | 06 Dec 2011 14:26:24 |
| Sample Name            | 06 Dec 2011 14:26:24 | File Name        | C:\Users\Asia\Desktop\2\fid | Frequency (MHz)        | 200.16               |
| Number of Transients   | 32                   | Origin           | spect                       | Original Points Count  | 8192                 |
| Pulse Sequence         | zg30                 | Receiver Gain    | 22.60                       | SW(cyclical) (Hz)      | 4139.07              |
| Spectrum Type          | STANDARD             | Sweep Width (Hz) | 4138.57                     | Temperature (degree C) | 19.400               |

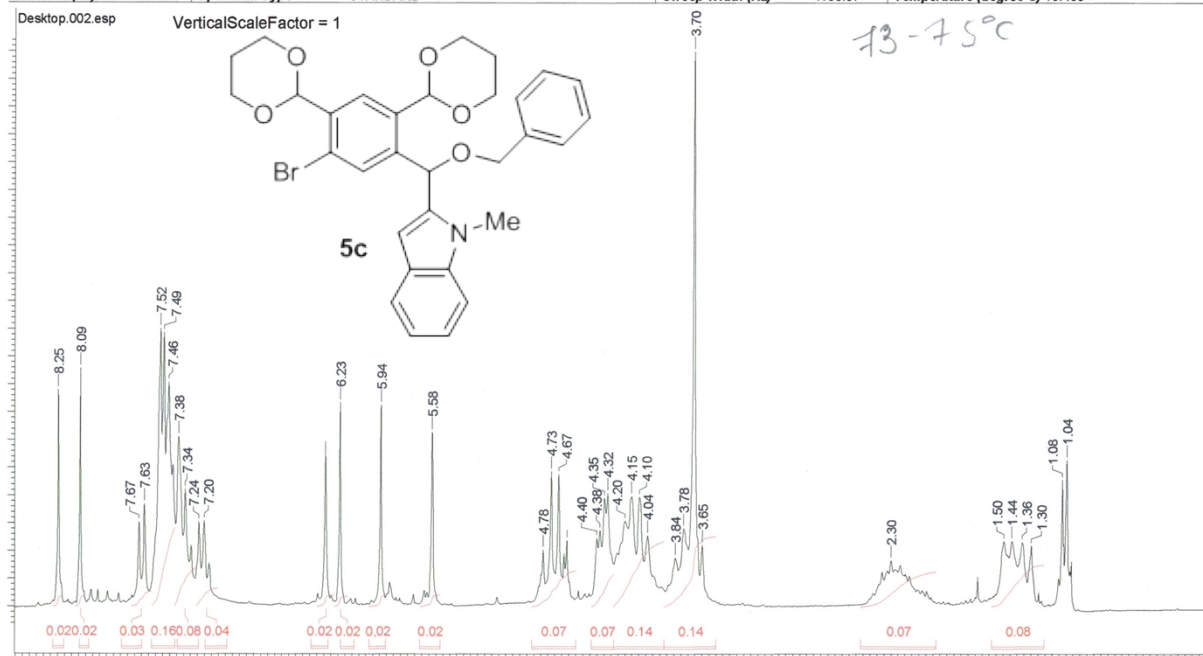

This report was created by ACD/NMR Processor Academic Edition. For more information go to [www.acdlabs.com/nmrproc/](http://www.acdlabs.com/nmrproc/)

### m-IndOBn

10/25/2013 2:46:46 PM  
j. skalik =p-indobu /9/= 13C{1H}

|                        |                      |                      |                                                  |                   |                      |
|------------------------|----------------------|----------------------|--------------------------------------------------|-------------------|----------------------|
| Acquisition Time (sec) | 0.9088               | Comment              | j. skalik =p-indobu /9/= 13C{1H}                 | Date              | 17 Oct 2013 03:10:24 |
| Date Stamp             | 17 Oct 2013 03:10:24 | File Name            | C:\Users\User\Desktop\Nowy folder\ska11610\4\fid | Frequency (MHz)   | 125.76               |
| Nucleus                | 13C                  | Number of Transients | 6776                                             | Origin            | AV_III_500           |
| Original Points Count  | 32768                | Owner                | nmsu                                             | Points Count      | 32768                |
| Pulse Sequence         | zgpg30               | Receiver Gain        | 2050.00                                          | SW(cyclical) (Hz) | 36057.69             |
| Solvent                | CHLOROFORM-d         | Spectrum Type        | STANDARD                                         | Sweep Width (Hz)  | 36056.59             |
| Temperature (degree C) | 22.001               | Spectrum Offset (Hz) | 15081.5615                                       |                   |                      |

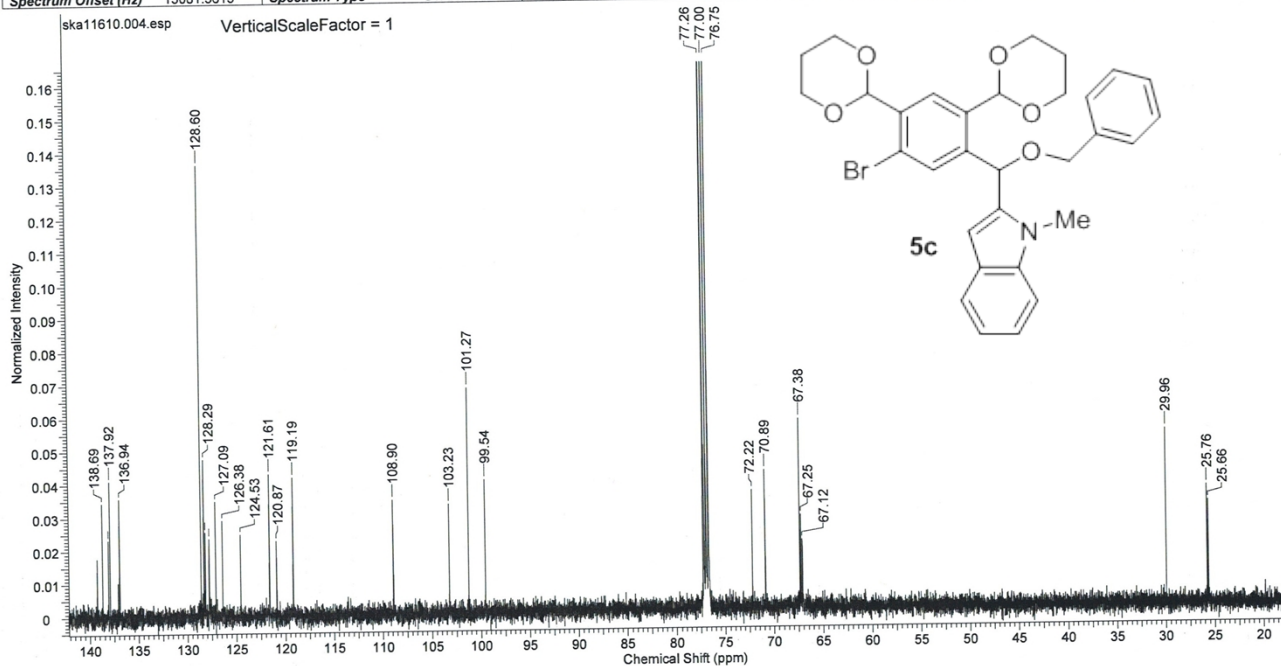

This report was created by ACD/NMR Processor Academic Edition. For more information go to [www.acdlabs.com/nmrproc/](http://www.acdlabs.com/nmrproc/)  
**p-IndOBn**

10/30/2013 11:23:12 AM  
 Skalik J. p-IndOBn

| Acquisition Time (sec) | Comment              | Skalik J. p-IndOBn   | Date                               | 29 Oct 2013 15:49:36   |              |
|------------------------|----------------------|----------------------|------------------------------------|------------------------|--------------|
| Date Stamp             | 29 Oct 2013 15:49:36 | File Name            | C:\Users\User\Desktop\sk129102\fid | Frequency (MHz)        | 200.16       |
| Nucleus                | 1H                   | Number of Transients | 64                                 | Origin                 | spect        |
| Points Count           | 8192                 | Pulse Sequence       | zg30                               | Receiver Gain          | 645.10       |
| Spectrum Offset (Hz)   | 1696.7002            | Spectrum Type        | STANDARD                           | SW(cyclical) (Hz)      | 4139.07      |
|                        |                      | Sweep Width (Hz)     | 4138.57                            | Temperature (degree C) | 19.900       |
|                        |                      |                      |                                    | Owner                  | root         |
|                        |                      |                      |                                    | Solvent                | CHLOROFORM-d |

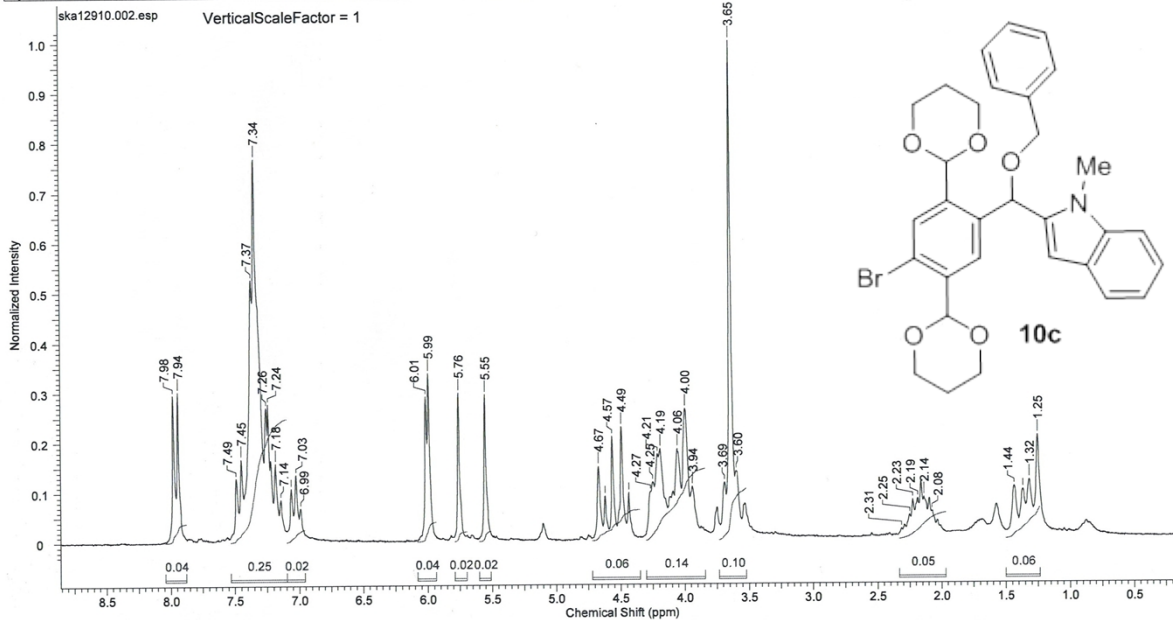

This report was created by ACD/NMR Processor Academic Edition. For more information go to [www.acdlabs.com/nmrproc/](http://www.acdlabs.com/nmrproc/)  
**p-IndOBn**

10/30/2013 11:52:16 AM  
 j. skalik -p-indobu /9/= 13C{1H}

| Acquisition Time (sec) | Comment              | j. skalik -p-indobu /9/= 13C{1H} | Date                                     | 17 Oct 2013 03:10:24   |              |
|------------------------|----------------------|----------------------------------|------------------------------------------|------------------------|--------------|
| Date Stamp             | 17 Oct 2013 03:10:24 | File Name                        | C:\Users\User\Desktop\PRACA\sk116104\fid |                        |              |
| Frequency (MHz)        | 125.76               | Nucleus                          | 13C                                      | Number of Transients   | 6776         |
| Original Points Count  | 32768                | Owner                            | nimsu                                    | Points Count           | 32768        |
| Receiver Gain          | 2050.00              | SW(cyclical) (Hz)                | 35057.69                                 | Pulse Sequence         | zgpg30       |
| Spectrum Offset (Hz)   | 15081.5615           | Spectrum Type                    | STANDARD                                 | Solvent                | CHLOROFORM-d |
|                        |                      | Sweep Width (Hz)                 | 36056.59                                 | Temperature (degree C) | 22.001       |

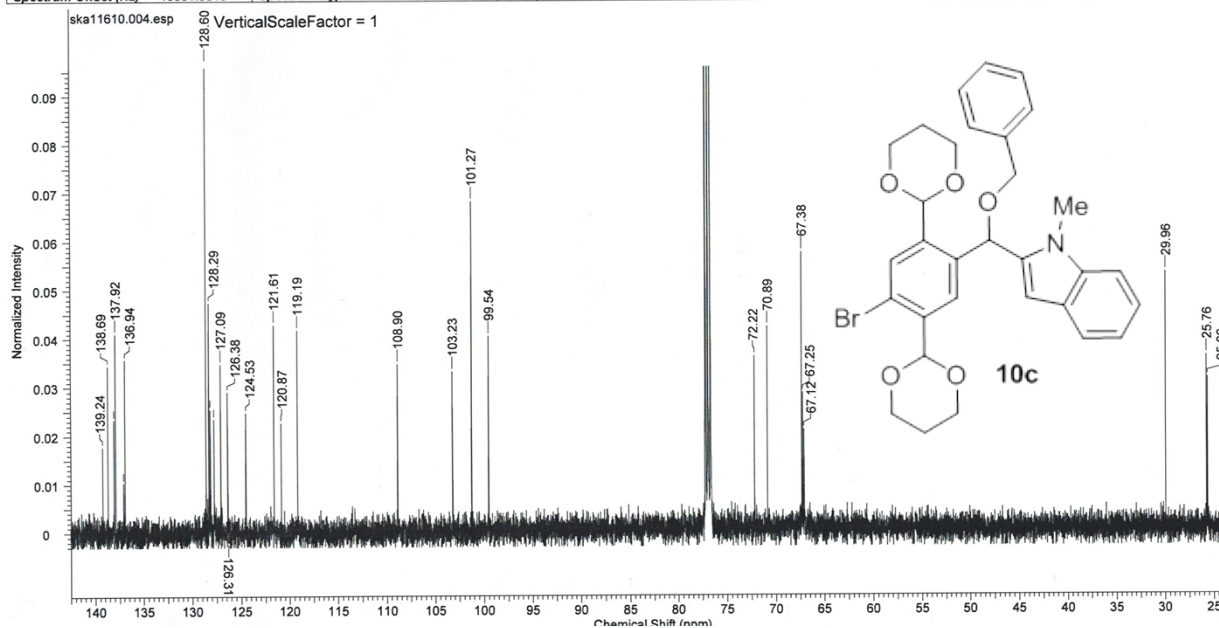





This report was created by ACD/NMR Processor Academic Edition. For more information go to [www.acdlabs.com/nmrproc/](http://www.acdlabs.com/nmrproc/)

### p-BTFOBn

9/24/2013 1:18:17 PM  
p-BTFOBn

| Acquisition Time (sec) | 1.9792                              | Comment               | p-BTFOBn     | Date             | 24 Sep 2013 12:48:32 | Date Stamp             | 24 Sep 2013 12:48:32 |
|------------------------|-------------------------------------|-----------------------|--------------|------------------|----------------------|------------------------|----------------------|
| File Name              | C:\Users\User\Desktop\sk22409\2\fid | Original Points Count | 8192         | Frequency (MHz)  | 200.16               | Nucleus                | <sup>1</sup> H       |
| Origin                 | spect                               | SW(cyclical) (Hz)     | 4139.07      | Owner            | root                 | Points Count           | 8192                 |
| Receiver Gain          | 181.00                              | Solvent               | CHLOROFORM-d | Sweep Width (Hz) | 4138.57              | Temperature (degree C) | 19.200               |
| Spectrum Type          | STANDARD                            |                       |              |                  |                      | Puls                   |                      |
|                        |                                     |                       |              |                  |                      | Spec                   |                      |

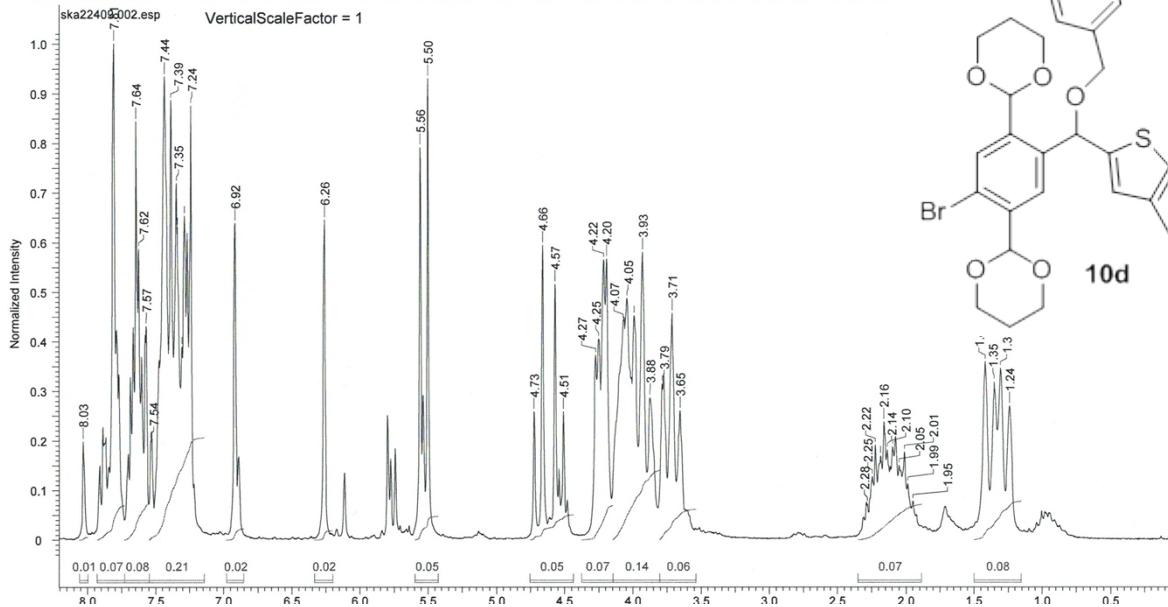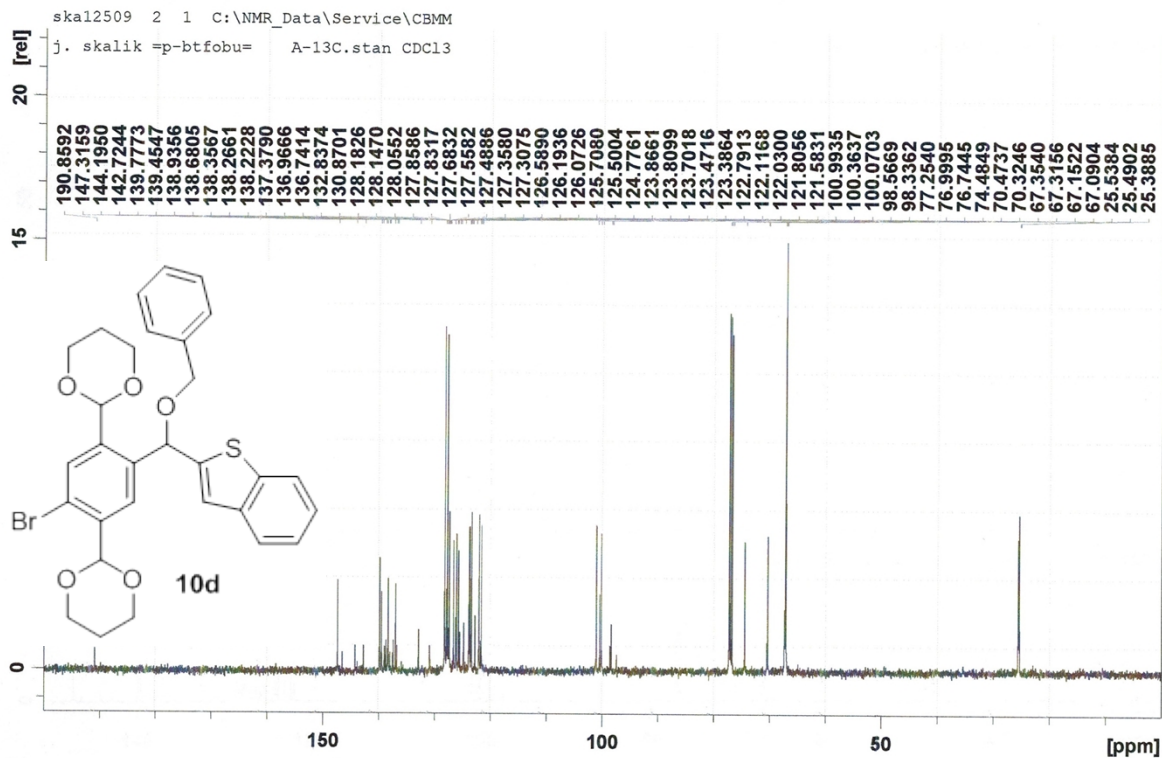

**MANTRA**

2/23/2015 5:23:28 PM

|                        |                      |                      |                                               |                      |                      |
|------------------------|----------------------|----------------------|-----------------------------------------------|----------------------|----------------------|
| Acquisition Time (sec) | 1.9792               | Comment              | MANTRA 2                                      | Date                 | 23 Jan 2015 15:49:36 |
| Date Stamp             | 23 Jan 2015 15:49:36 | File Name            | C:\USERS\ASIA\DESKTOP\MISTPOPRAWK\IMANTRA\FID |                      |                      |
| Frequency (MHz)        | 200.16               | Nucleus              | <sup>1</sup> H                                | Number of Transients | 32                   |
| Owner                  | root                 | Points Count         | 8192                                          | Pulse Sequence       | zg30                 |
| Solvent                | CHLOROFORM-d         | Receiver Gain        | 1824.60                                       | SW(cyclical) (Hz)    | 4139.07              |
| Temperature (degree C) | 19.500               | Spectrum Offset (Hz) | 1626.7002                                     | Spectrum Type        | STANDARD             |
|                        |                      | Sweep Width (Hz)     |                                               |                      | 4138.57              |

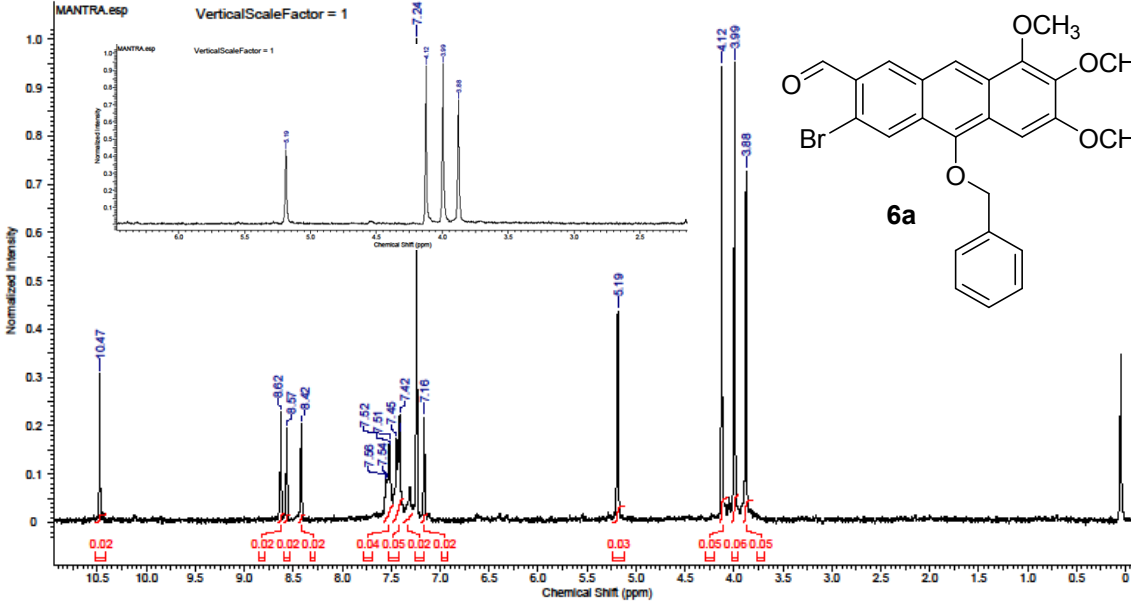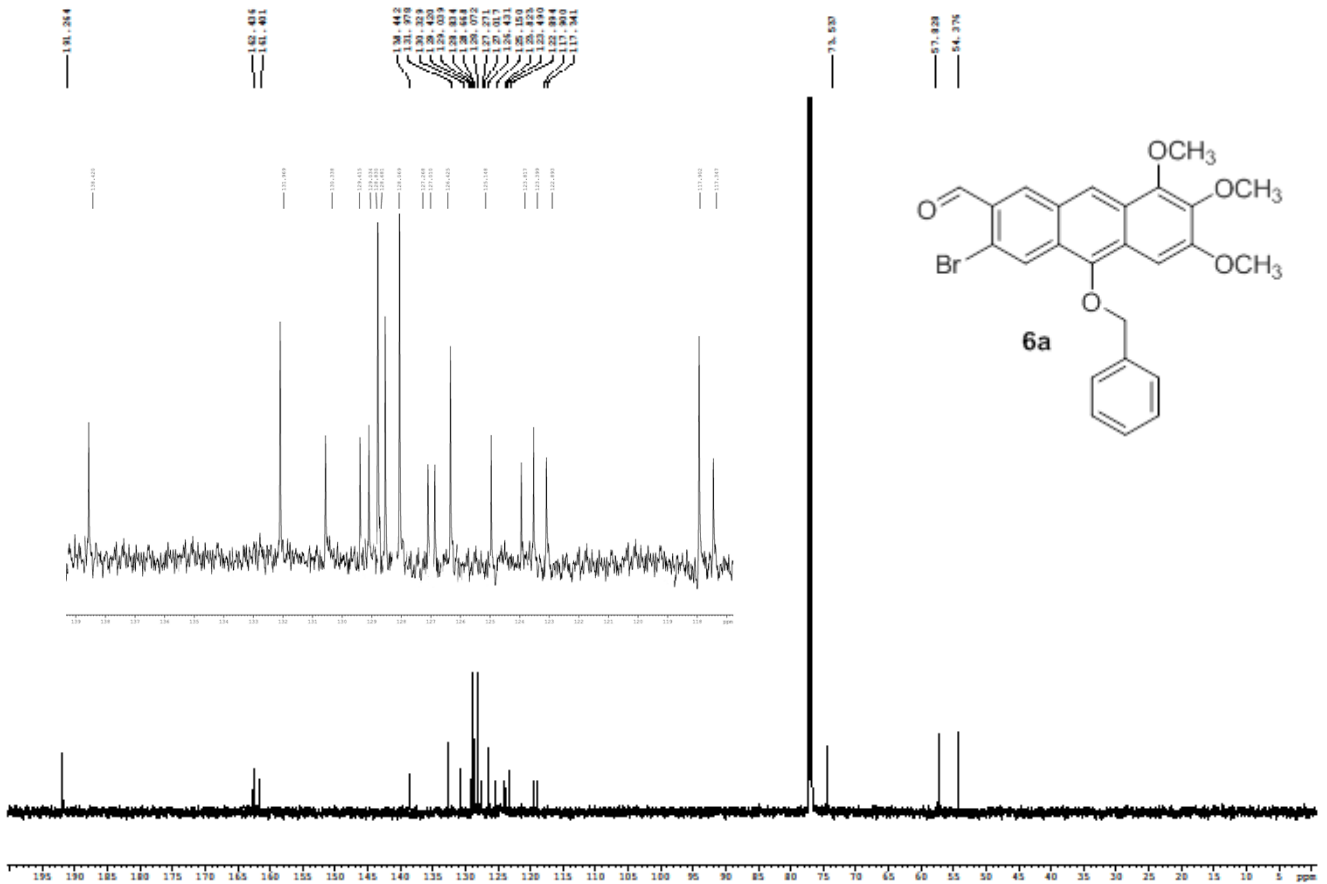

This report was created by ACD/NMR Processor Academic Edition. For more information go to www.acdlabs.com/nmrproc/

### p-ANTRA

10/11/2013 1:11:43 PM  
p-Antra

|                        |                                   |                       |              |                  |                      |                      |                      |
|------------------------|-----------------------------------|-----------------------|--------------|------------------|----------------------|----------------------|----------------------|
| Acquisition Time (sec) | 1.9792                            | Comment               | p-Antra      | Date             | 10 Oct 2013 15:13:36 | Date Stamp           | 10 Oct 2013 15:13:36 |
| File Name              | C:\Users\User\Desktop\p-antra\fid | Original Points Count | 8192         | Frequency (MHz)  | 200.16               | Nucleus              | 1H                   |
| Origin                 | spect                             | SW(cyclical) (Hz)     | 4139.07      | Owner            | root                 | Points Count         | 8192                 |
| Receiver Gain          | 1290.20                           | Solvent               | CHLOROFORM-d | Sweep Width (Hz) |                      | Pulse Sequence       | zg30                 |
| Spectrum Type          | STANDARD                          |                       |              |                  |                      | Spectrum Offset (Hz) | 1696.7002            |

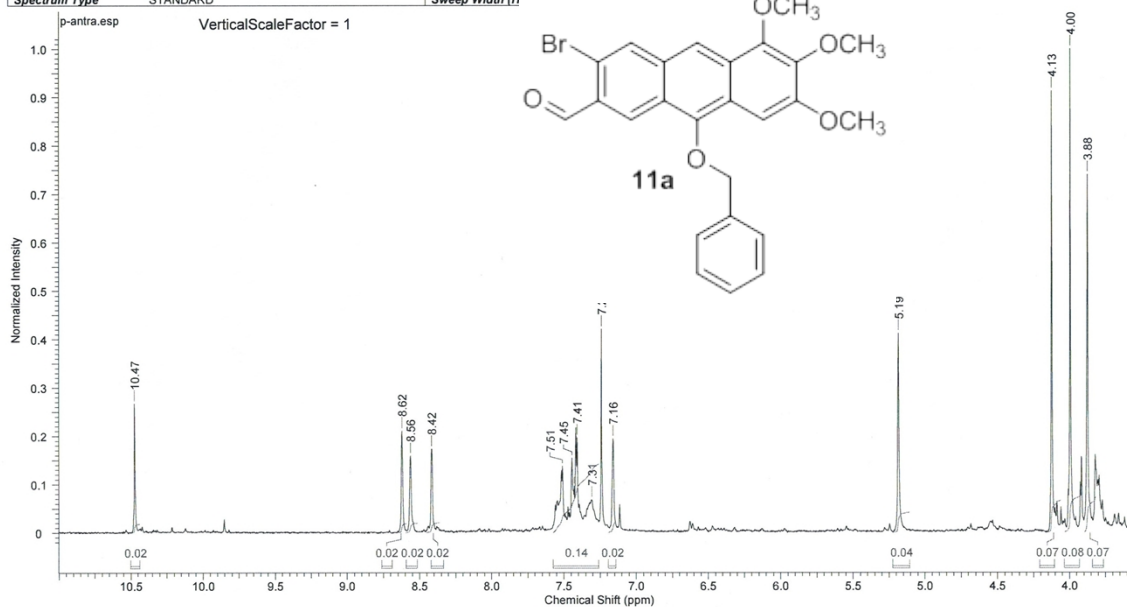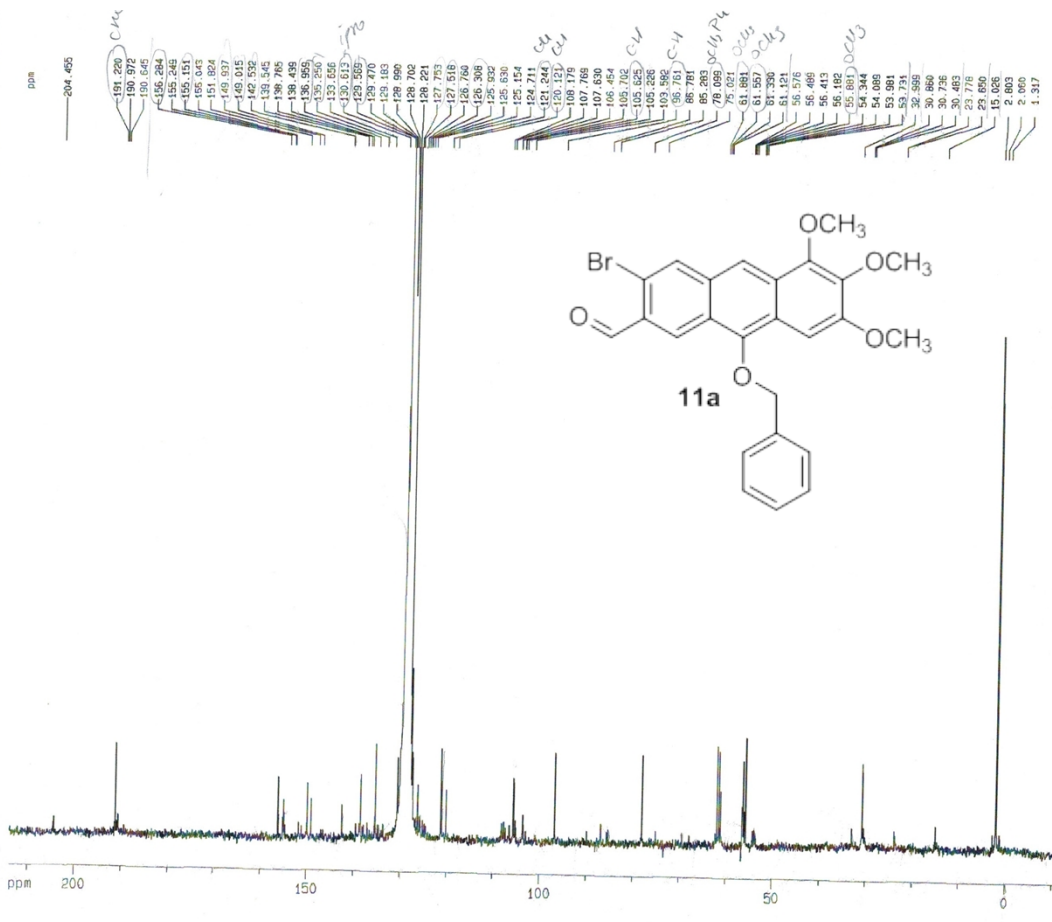

```

*** NMR LAB ***
** AVANCE AV 200 **
Tel: 0426803 226

Current Data Parameters
NAME          ska20010
EXPNO        2
PROCNO       1
DU           C:/u
USER         service

F2 - Acquisition Parameters
Date_        20131009
Time         19.45
INSTRUM     AV_200
PROBHD      5 mm QNP 1H/1
PULPROG     zgpg30
TD          32768
SOLVENT     CDCl3
NS          (65548)
DS          2
SWH         12345.679 Hz
FIDRES     0.337650 Hz
AQ         1.3271540 sec
RG         5190.6
DW         40.500 usec
DE         7.00 usec
TE         300.2 K
D1         2.0000000 sec
d11        0.0300000 sec
DELTA      1.8999999 sec
NCREST     0.0000000 sec
NCHW       0.0150000 sec

===== CHANNEL f1 =====
NUC1        13C
P1          4.75 usec
PL1         1.00 dB
SFO1       50.3359083 MHz

===== CHANNEL f2 =====
CHOPROG     waltz16
NUC2         1H
PCPD2       100.00 usec
PL2         -1.00 dB
PL12        22.10 dB
PL13        26.00 dB
SFO2       200.1610008 MHz

F2 - Processing parameters
SI          32768
SF          50.3302200 MHz
RGW         EM
SSB         0
LB          2.00 Hz
GB          0
PC          1.40

1D NMR plot parameters
CX          22.50 cm
CY          212.10 cm
F1P         213.905 ppm
F1          10765.91 Hz
F2          -12.216 ppm
F2          -614.85 Hz
P1MCH      10.04886 ppm/cm
H2CN       505.81152 Hz/cm
    
```



**MANTRADM**

1/20/2015 3:50:15 PM  
3

|                        |                                        |                       |         |                        |                      |                      |                      |
|------------------------|----------------------------------------|-----------------------|---------|------------------------|----------------------|----------------------|----------------------|
| Acquisition Time (sec) | 1.9792                                 | Comment               | 3       | Date                   | 16 Jan 2015 14:43:28 | Date Stamp           | 16 Jan 2015 14:43:28 |
| File Name              | C:\USERS\USER\DESKTOP\NEWSKA215013\FID | Frequency (MHz)       | 200.16  | Nucleus                | <sup>1</sup> H       | Number of Transients | 16                   |
| Origin                 | AV-200                                 | Original Points Count | 8192    | Owner                  | root                 | Points Count         | 8192                 |
| Receiver Gain          | 1290.20                                | SWH (Hz)              | 4139.07 | Solvent                | CHLOROFORM-d         | Pulse Sequence       | zg30                 |
| Spectrum Type          | STANDARD                               | Sweep Width (Hz)      | 4136.57 | Temperature (degree C) | 19.500               | Spectrum Offset (Hz) | 1696.7002            |

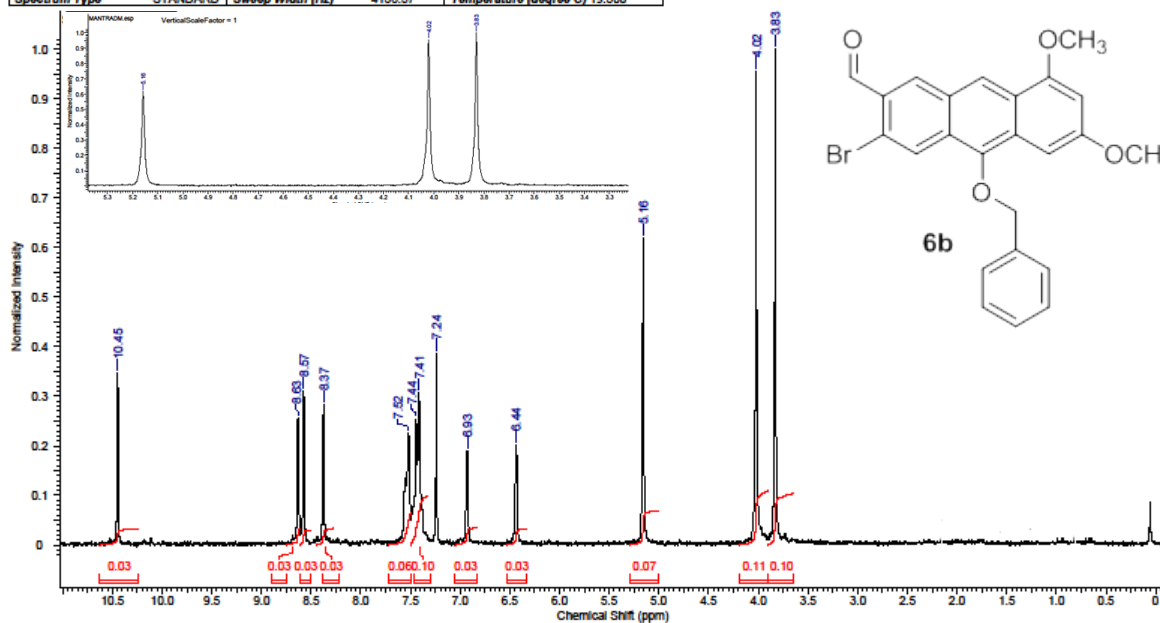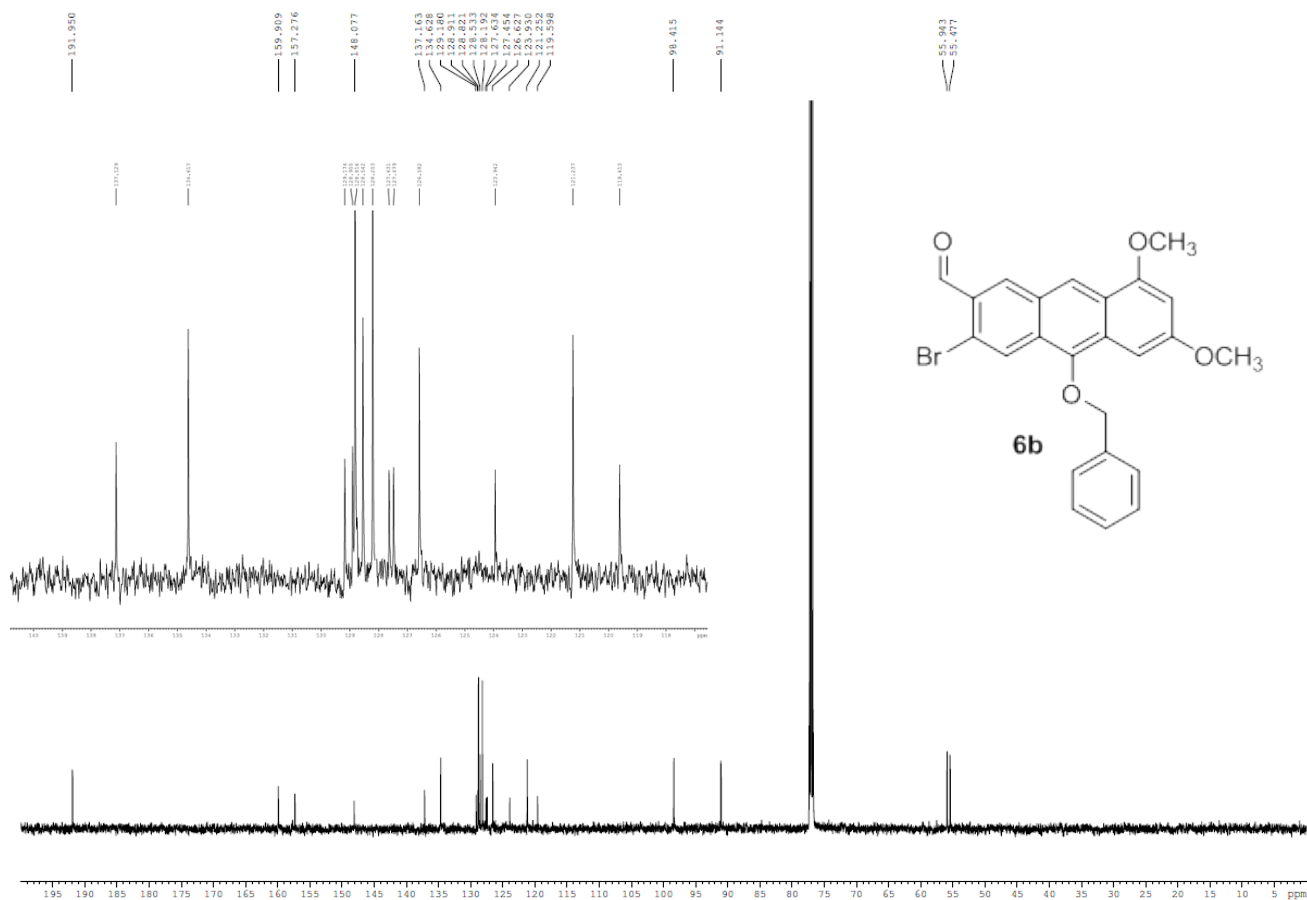



9/16/2013 12:50:05 PM  
 cyklizacja p dimet

| Acquisition Time (sec) | 1.9792               | Comment              | cyklizacja p dimet                  | Date              | 16 Sep 2013 12:35:44   |        |
|------------------------|----------------------|----------------------|-------------------------------------|-------------------|------------------------|--------|
| Date Stamp             | 16 Sep 2013 12:35:44 | File Name            | C:\Users\User\Desktop\sk11609\11f.d | Frequency (MHz)   | 200.16                 |        |
| Nucleus                | <sup>1</sup> H       | Number of Transients | 128                                 | Origin            | spect                  |        |
| Points Count           | 8192                 | Pulse Sequence       | zg30                                | Receiver Gain     | 2298.80                |        |
| Spectrum Offset (Hz)   | 1696.7002            | Spectrum Type        | STANDARD                            | SW(cyclical) (Hz) | 4139.07                |        |
|                        |                      |                      | Sweep Width (Hz)                    | 4138.57           | Temperature (degree C) | 17.300 |

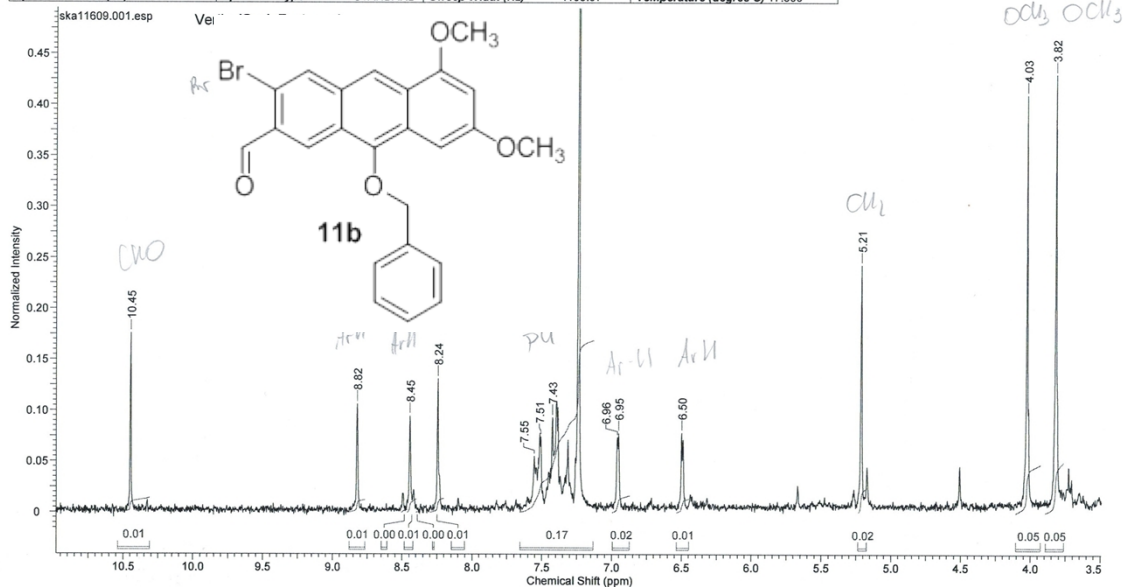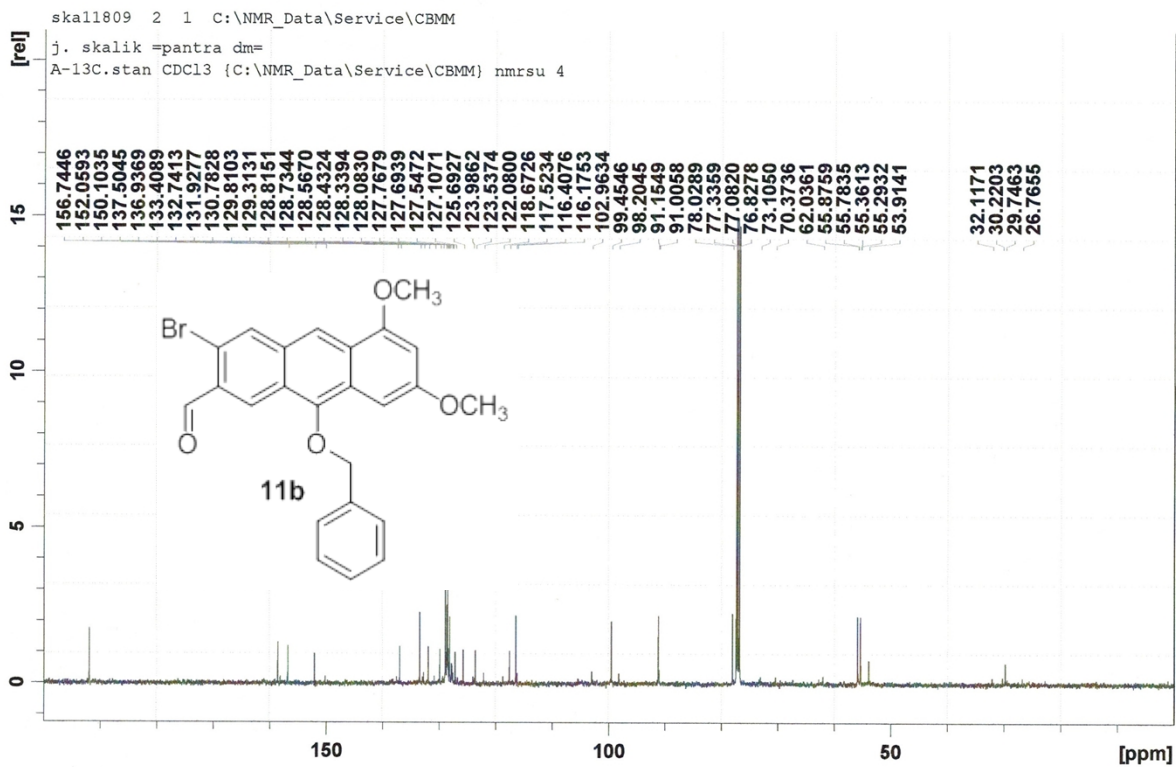



This report was created by ACD/NMR Processor Academic Edition. For more information go to [www.acdlabs.com/nmrproc/](http://www.acdlabs.com/nmrproc/)  
**p-IND**

10/25/2013 9:50:29 AM  
 J. Skalik p-IND

| Acquisition Time (sec) | Comment              | J. Skalik p-IND      | Date                                 | 24 Oct 2013 13:54:40   |              |
|------------------------|----------------------|----------------------|--------------------------------------|------------------------|--------------|
| Date Stamp             | 24 Oct 2013 13:54:40 | File Name            | C:\Users\User\Desktop\ska12410\1\fid | Frequency (MHz)        | 200.16       |
| Nucleus                | 1H                   | Number of Transients | 32                                   | Origin                 | spect        |
| Points Count           | 8192                 | Pulse Sequence       | zg30                                 | Receiver Gain          | 1824.60      |
| Spectrum Offset (Hz)   | 1696.7002            | Spectrum Type        | STANDARD                             | SW(cyclical) (Hz)      | 4139.07      |
|                        |                      | Sweep Width (Hz)     | 4138.57                              | Temperature (degree C) | 19.900       |
|                        |                      |                      |                                      | Owner                  | root         |
|                        |                      |                      |                                      | Solvent                | CHLOROFORM-d |

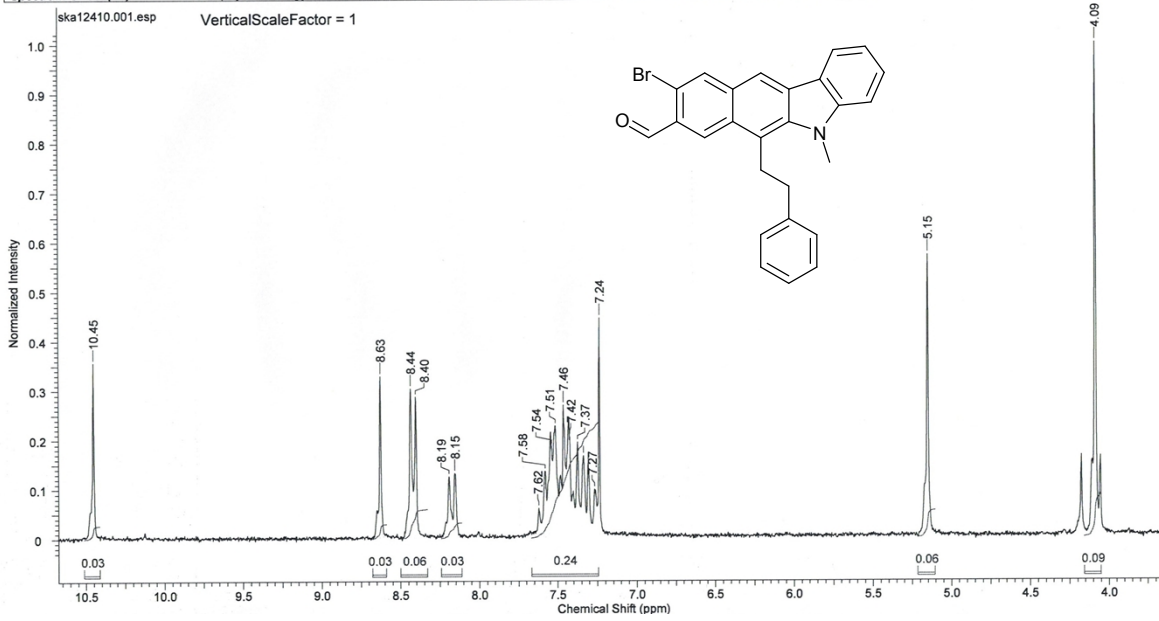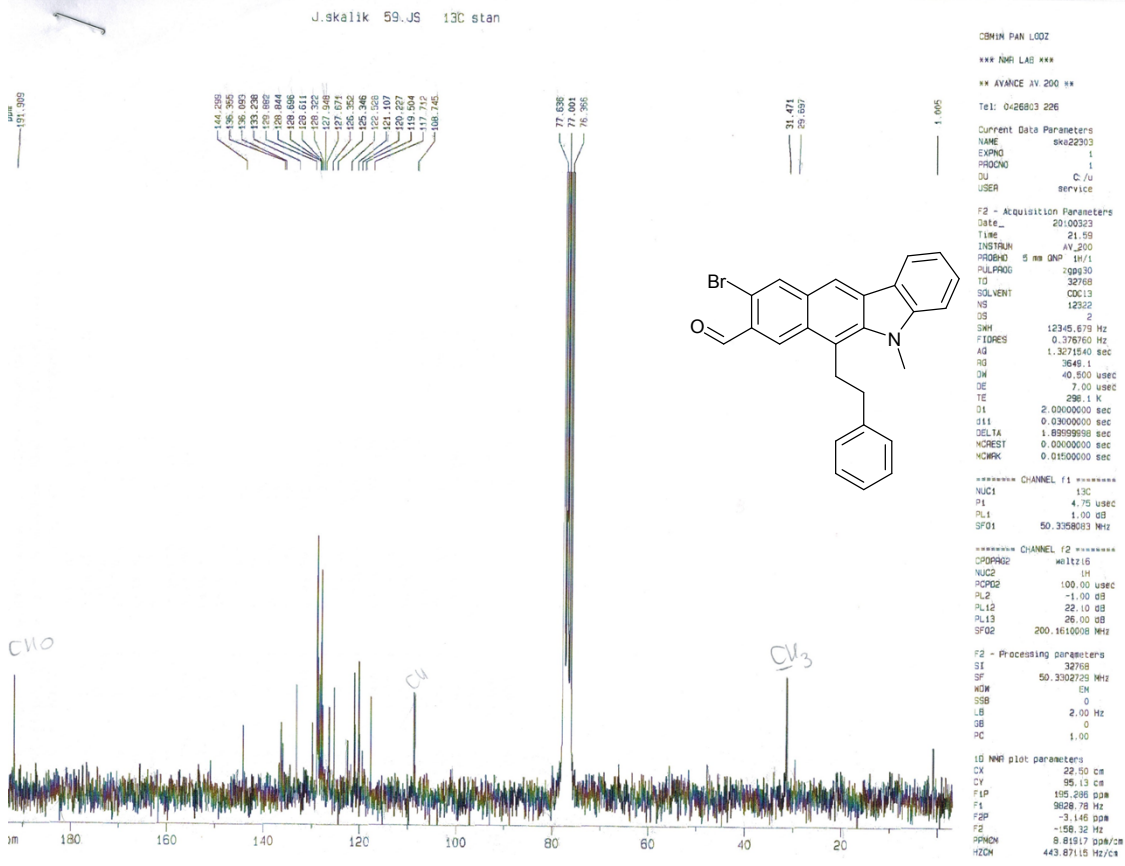



### MBTF

2/23/2015 5:14:37 PM

| Acquisition Time (sec) | Comment                                 | bif           | Date     | 20 Feb 2015 14:13:36  | Date Stamp | 20 Feb 2015 14:13:36   |                |
|------------------------|-----------------------------------------|---------------|----------|-----------------------|------------|------------------------|----------------|
| File Name              | C:\USERS\ASIA\DESKTOP\MISTPO\RAWKIBTFID |               |          | Frequency (MHz)       | 200.16     | Nucleus                | <sup>1</sup> H |
| Number of Transients   | 64                                      | Origin        | AV-200   | Original Points Count | 8192       | Owner                  | root           |
| Pulse Sequence         | zg30                                    | Receiver Gain | 2048.00  | SW(cyclical) (Hz)     | 4139.07    | Solvent                | CHLOROFORM-d   |
| Spectrum Offset (Hz)   | 1696.7002                               | Spectrum Type | STANDARD | Sweep Width (Hz)      | 4138.57    | Temperature (degree C) | 19.300         |

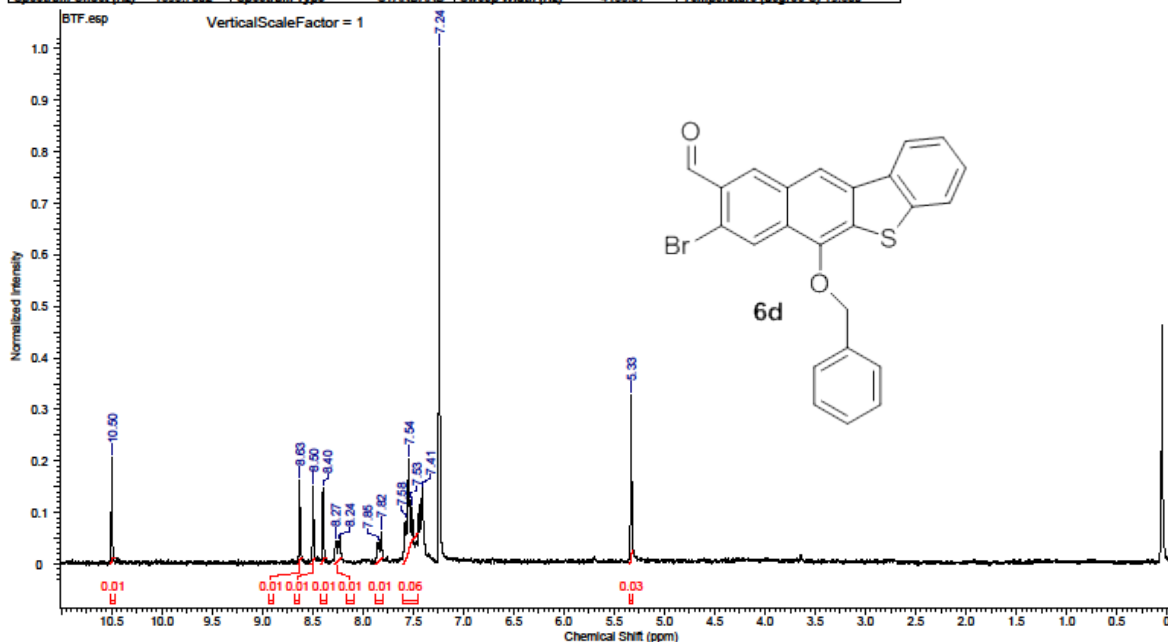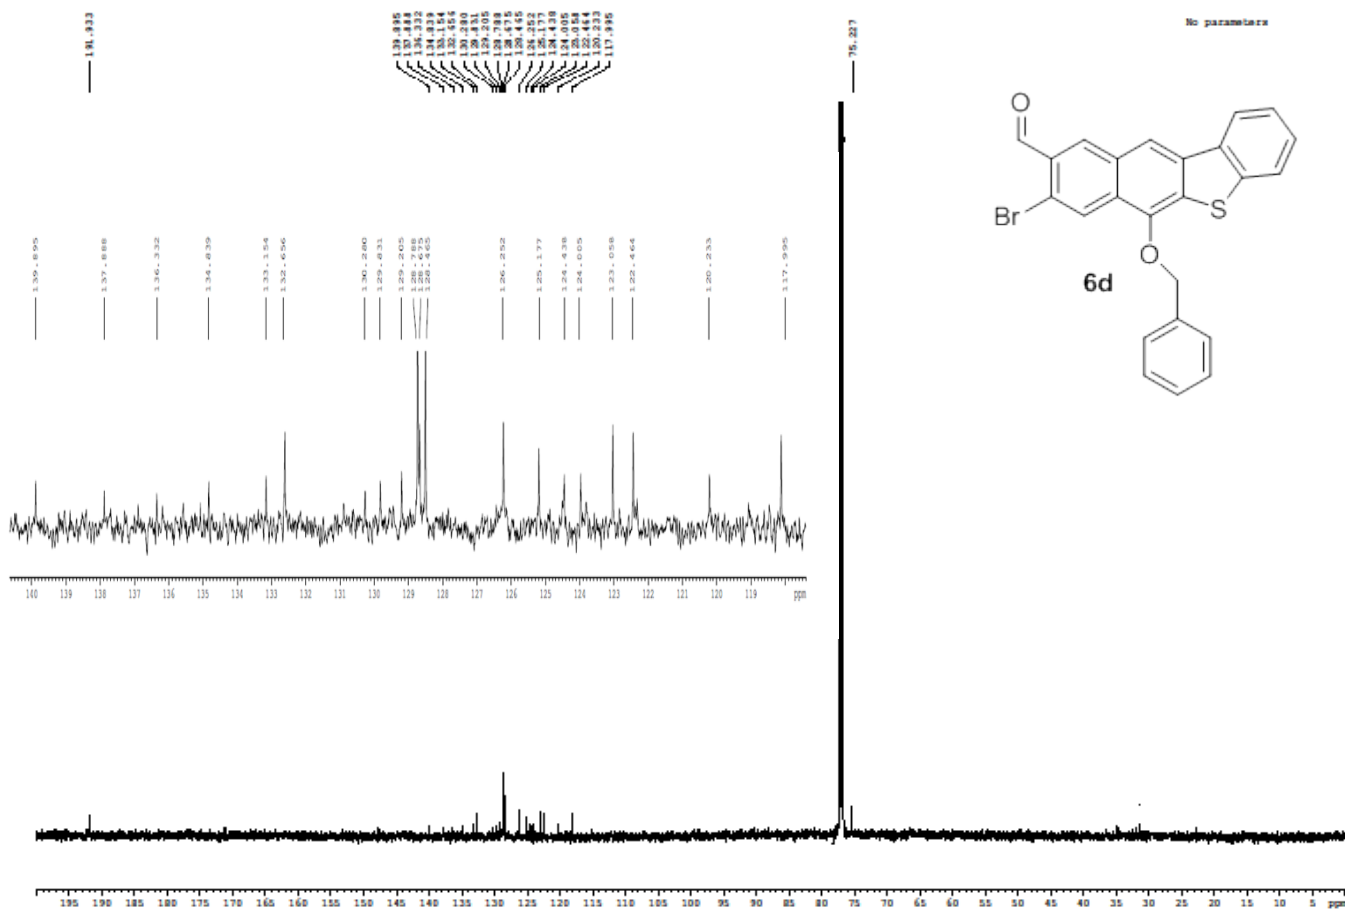

This report was created by ACD/NMR Processor Academic Edition. For more information go to [www.acdlabs.com/nmrproc/](http://www.acdlabs.com/nmrproc/)  
**p-BTF**

|                        |                      |                      |                             |                        |                      |
|------------------------|----------------------|----------------------|-----------------------------|------------------------|----------------------|
| Acquisition Time (sec) | 1.9792               | Comment              | Skalik J. p-BTF             | Date                   | 02 Oct 2013 08:51:44 |
| Date Stamp             | 02 Oct 2013 08:51:44 | File Name            | C:\Users\User\Desktop\2\fid | Frequency (MHz)        | 200.16               |
| Nucleus                | 1H                   | Number of Transients | 32                          | Origin                 | spect                |
| Points Count           | 8192                 | Pulse Sequence       | zg30                        | Receiver Gain          | 1625.50              |
| Spectrum Offset (Hz)   | 1696.7002            | Spectrum Type        | STANDARD                    | SW(cyclical) (Hz)      | 4139.07              |
|                        |                      |                      |                             | Sweep Width (Hz)       | 4138.57              |
|                        |                      |                      |                             | Temperature (degree C) | 18.800               |

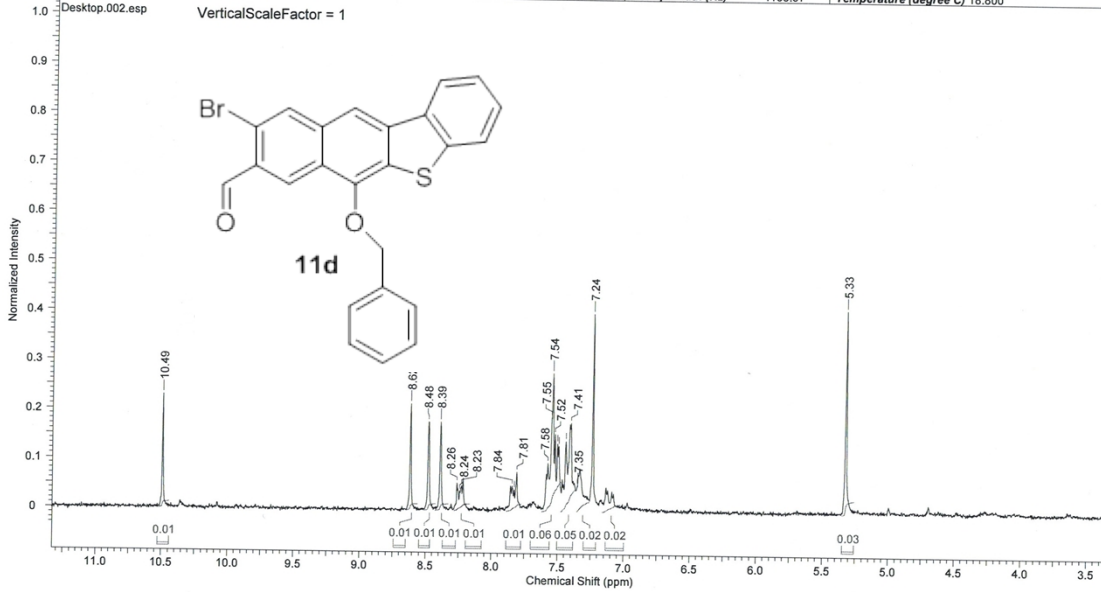

j. skalik =p-btf= 13C{1H}

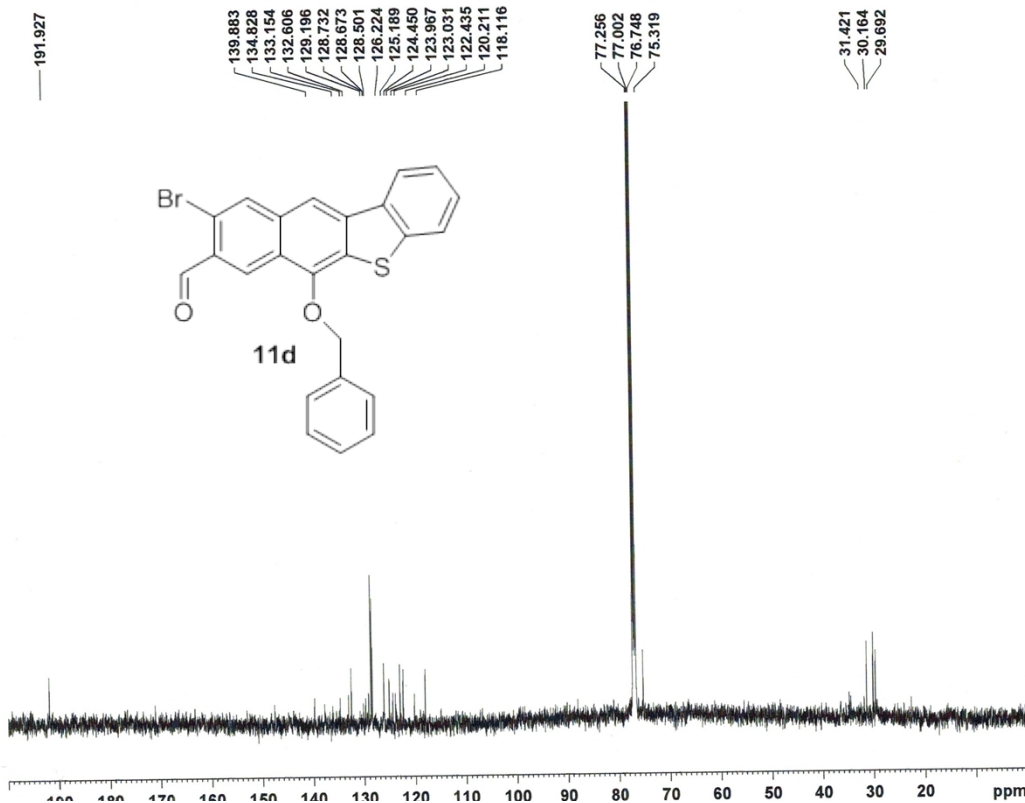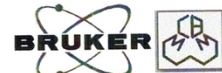

\*\*\*CBMIM PAN LODZ\*\*  
 \*\*\*\* NMR LAB \*\*\*\*  
 \*\*AV III 500 MHz\*\*  
 Tel:042 6803 307

Current Data Parameters  
 DATPATH C:\NMR\_Data\Service\CBMM  
 NAME skat0210  
 EXPNO 2  
 PROCNO 1

F2 - Acquisition Parameters  
 Date\_ 20131002  
 Time 9.50  
 INSTRUM AV III 500  
 PROBHD 5 mm TXI 31P Z  
 PULPROG zgpg30  
 TD 65536  
 SOLVENT CDCl3  
 NS 3072  
 DS 4  
 SWH 36057.891 Hz  
 FIDRES 0.550197 Hz  
 AQ 0.9087659 sec  
 RG 2050  
 DW 13.867 usec  
 DE 6.50 usec  
 TE 295.0 K  
 D1 2.0000000 sec  
 D11 0.0300000 sec  
 TD0 6

===== CHANNEL f1 =====  
 SF01 125.7728788 MHz  
 NUC1 13C  
 P1 11.50 usec  
 PLW1 226.0000000 W

===== CHANNEL f2 =====  
 SF02 500.1324005 MHz  
 NUC2 1H  
 CPDPRG2 waltz16  
 PCPD2 100.00 usec  
 PLW2 9.0000000 W  
 PLW12 0.08398400 W  
 PLW13 0.08398400 W

F2 - Processing parameters  
 SI 32768  
 SF 125.7577956 MHz  
 WDW EM  
 SSB 0  
 LB 2.00 Hz  
 GB 0  
 PC 1.40  
 SR 6.61 Hz
